# Supplementary material for: Centrosome amplification and aneuploidy driven by the HIV-1-induced Vpr•VprBP•Plk4 complex in CD4+ T cells
Source: Research Square preprint supplement (doi:10.21203/rs.3.rs-2924123/v1), 2023-08-22
Supplement: Supplementary file 1 [file 53da1d68485be3c79d7f3262.xlsx]

## Sheet: Fig. 1
	Fig. 1B
			Total	T cells with multi-centrosomes
			Count	Count	% Cells
		Healthy Person 1	523	0	0
		Healthy Person 2	387	0	0
		Patient 1	316	16	5.06329
		Patient 2	330	8	2.42424
		Patient 3	370	19	5.13514
		Patient 4	326	3	0.920245
		Patient 5	313	3	0.958466

## Sheet: Fig. 4b, c
	Fig. 4b																																			Fig. 4c
										Vpr		P value															Plk4		P value								% Cells with multi-centrosome
										shLuc	shVprBP	<0.0001	****														shLuc	shVprBP	<0.0001	****								shLuc	shVprBP	shPlk4				P value
										shLuc	shPlk4	0.0053	**														shLuc	shPlk4	<0.0001	****							Mean	18.6507	4.24901	1.72219		shLuc	shVprBP	<0.0001	****
																																					S.D.	1.25946	0.603595	0.532949		shLuc	shPlk4	<0.0001	****
		Centrosomal Vpr intensity								Rel. centrosomal Vpr intensity									Centrosomal Plk4 intensity								Rel. centrosomal Plk4 intensity
			mGFP-Vpr								mGFP-Vpr									mGFP-Vpr								mGFP-Vpr
			shLuc		shVprBP		shPlk4				shLuc		shVprBP		shPlk4					shLuc		shVprBP		shPlk4				shLuc		shVprBP		shPlk4					No. of cells with multi-centrosome
			1 ≤ n ≤ 2	n ≥ 3	1 ≤ n ≤ 2	n ≥ 3	1 ≤ n ≤ 2	n ≥ 3			1 ≤ n ≤ 2	n ≥ 3	1 ≤ n ≤ 2	n ≥ 3	1 ≤ n ≤ 2	n ≥ 3				1 ≤ n ≤ 2	n ≥ 3	1 ≤ n ≤ 2	n ≥ 3	1 ≤ n ≤ 2	n ≥ 3			1 ≤ n ≤ 2	n ≥ 3	1 ≤ n ≤ 2	n ≥ 3	1 ≤ n ≤ 2	n ≥ 3				Exp 1		multi-cent.	Total			% Cells with multi-centrosome
		Exp 1	765.49	7011.13	180.339	1100.72	899.677	1045.34		Exp 1	0.86621	7.93362	0.204067	1.24555	1.01805	1.18288			Exp 1	2692.48	5581.28	1001.78	2731.63	902.021	871.073		Exp 1	0.87562	1.81509	0.325788	0.888355	0.293346	0.283282					shLuc	104	519			shLuc	shVprBP	shPlk4
			1180.89	8501.47	106.709	671.862	1078.34				1.33627	9.62005	0.120749	0.760263	1.22023					2206.96	1794.05	525.704	1883.16	226.85				0.717727	0.583444	0.170964	0.612423	0.0737738						shVprBP	21	451		Exp 1	20.0385	4.65632	2.31579
			432.313	2263.86	469.709		578.846				0.489195	2.56173	0.531512		0.655008					4478.05	3875.52	1416.76		632.049				1.45631	1.26036	0.460746		0.205549						shPlk4	11	475		Exp 2	18.3333	4.53515	1.2848
			1060.74	284.58	445.086		624.369				1.20031	0.322024	0.503649		0.706521					2459.75	3436.56	1306.33		768.804				0.799936	1.1176	0.424832		0.250023										Exp 3	17.5803	3.55556	1.566
			939.412	1714.68	211.116		887.064				1.06302	1.94029	0.238894		1.00378					4365.06	2855.5	1282.92		348.383				1.41956	0.928639	0.417219		0.113298					Exp 2		multi-cent.	Total		Mean	18.6507	4.24901	1.72219
			602.554	2501.82	66.8654		966.995				0.681836	2.831	0.0756632		1.09423					4575.16	1472.23	2203.62		598.367				1.48789	0.478782	0.71664		0.194595						shLuc	88	480		S.D.	1.25946	0.603595	0.532949
			361.159	4555.41	346.635		788.136				0.408678	5.15479	0.392244		0.891835					2642.45	3870.29	2297.38		511.473				0.859352	1.25866	0.747131		0.166336						shVprBP	20	441
			664.409	3963.28	653.444		340.559				0.751829	4.48475	0.739422		0.385368					3267.28	1276.88	3043.92		596.239				1.06255	0.415254	0.989913		0.193903						shPlk4	6	467
			909.095	387.978	610.133		771.843				1.02871	0.439027	0.690412		0.873398					2815.32	2609.88	901.829		521.226				0.915572	0.848759	0.293284		0.169508
			1031.11	6338.92	412.43		214.022				1.16678	7.17297	0.466695		0.242182					3157.33	4571.3	1187.69		716.415				1.0268	1.48663	0.386249		0.232985					Exp 3		multi-cent.	Total
			239.645		655.472		211.883				0.271176		0.741716		0.239762					2702.25		2134.27		277.182				0.878799		0.694085		0.0901423						shLuc	93	529
			744.118		204.177		533.546				0.842025		0.231041		0.603747					1519.81		891.23		866.13				0.494258		0.289837		0.281674						shVprBP	16	450
			687.007		364.696		490.895				0.777401		0.412681		0.555485					3754.14		1190.67		239.678				1.22089		0.387218		0.0779457						shPlk4	7	447
			2650.82		660.051		343.108				2.99961		0.746897		0.388253					3539.45		1257.89		596.421				1.15107		0.409079		0.193962
			2574.48		102.182		385.926				2.91322		0.115626		0.436705					2518.07		944.29		836.116				0.818902		0.307093		0.271913
			2421.02		361.783		2192.82				2.73956		0.409385		2.48135					2862.8		1846.15		211.976				0.931012		0.600386		0.0689367
			400.159		30.7358		423.694				0.45281		0.0347798		0.479442					3369.82		1059.72		510.285				1.0959		0.344631		0.16595
			1181.81		0		672.143				1.33731		0		0.76058					4684.29		648.277		513.071				1.52338		0.210826		0.166856
			272.218		286.291		356.608				0.308035		0.32396		0.403529					3494.31		1712.42		324.061				1.13638		0.556897		0.105388
			1455.74		184.748		1697.38				1.64728		0.209056		1.92071					1605.31		1085.11		44.2733				0.522064		0.352889		0.0143981
			430.226		153.743		669.294				0.486833		0.173972		0.757357					4298.68		840.343		733.476				1.39798		0.273288		0.238534
			184.246		50.9832		636.509				0.208488		0.0576914		0.720258					2373.49		1773.44		0				0.771884		0.57674		0
			266.637		352.61		8.44933				0.30172		0.399005		0.00956106					3129.53		610.67		664.886				1.01775		0.198596		0.216228
			248.247		308.129		75.5131				0.28091		0.348672		0.0854488					3083.86		2595.04		555.802				1.0029		0.843934		0.180753
			1117.26		32.6127		76.0587				1.26426		0.0369037		0.0860661					1654.91		1778.5		406.501				0.538192		0.578386		0.132198
			155.996		726.54		256.281				0.176521		0.822135		0.290001					2697.74		2431.18		0				0.877331		0.790643		0
		Ave. of			11.4667		163.481						0.0129755		0.184991				Ave. of			1135.67		997.169						0.369332		0.324289
		rel. intensities			53.1222		302.738						0.0601117		0.342571				rel. intensities			1074.67		423.031						0.349494		0.137574
		883.724					118.436								0.134019				3074.94					391.75								0.127401
		Exp 2	2666.57	223.835	135.596	86.7212	159.707			Exp 2	3.88737	0.326311	0.197674	0.126424	0.232823				Exp 2	1846.35	3532.13	1480.46	4133.22	334.264			Exp 2	0.908764	1.7385	0.728677	2.03435	0.164523
			1249.38	2599.25	322.822		381.896				1.82136	3.78923	0.470615		0.556735					3715.48	2768.61	3098.01		149.002				1.82874	1.3627	1.52482		0.0733379
			1073.21	1387.5	95.0833		1609.42				1.56454	2.02272	0.138614		2.34625					5284.42	2681.08	2584.57		355.294				2.60096	1.31962	1.27211		0.174874
			39.0554	5617.4	12.8906		102.336				0.0569356	8.18914	0.0187921		0.149187					2561.93	6061.98	1144.63		429.104				1.26097	2.98368	0.56338		0.211203
			1020.96	1405.01	240.121		255.203				1.48837	2.04824	0.350052		0.372039					1625.32	5204.14	868.164		0				0.799977	2.56145	0.427306		0
			845.012	2648.35	53.6087		1368.61				1.23187	3.86081	0.0781516		1.99518					1442.92	3675.81	592.441		666.042				0.710199	1.80921	0.291596		0.327822
			1580.21	2922.02	0		443.244				2.30365	4.25977	0		0.646169					3887.08	2760.06	1829.03		564.676				1.9132	1.35849	0.90024		0.277931
			271.034	1375.07	100.686		148.291				0.395118	2.00461	0.146782		0.216181					2653.31	3492.03	674.45		989.285				1.30594	1.71876	0.331961		0.486921
			2061.74	1975.05	586.231		196.722				3.00564	2.87927	0.854618		0.286784					1215.83	3254.43	1874.67		592.455				0.598428	1.60181	0.922705		0.291603
			106.793	4642.73	253.393		1169.5				0.155685	6.76825	0.369401		1.70492					2137.56	4088.34	3141.53		451.129				1.05209	2.01226	1.54625		0.222044
			-24.1743	604.004	247.675		1103.9				-0.0352417	0.880527	0.361065		1.60928					2580.33	4777.87	2920.21		611.61				1.27003	2.35164	1.43731		0.301031
			103.07		97.003		35.0179				0.150257		0.141413		0.0510497					1388.45		1043.68		747.207				0.68339		0.513695		0.367772
			456.214		118.317		735.784				0.665076		0.172484		1.07264					4499.42		1429.84		375.723				2.21459		0.703759		0.184929
			726.037		13.6788		65.1551				1.05843		0.0199412		0.0949842					1676.64		2191.87		849.349				0.825232		1.07883		0.418045
			371.711		110.273		1331.44				0.541887		0.160758		1.941					2242.41		1286.29		766.29				1.1037		0.633107		0.377164
			340.93		131.449		13.1476				0.497013		0.191628		0.0191668					1713.73		1885		509.74				0.843487		0.92779		0.250892
			463.867		55.1652		16.3763				0.676233		0.0804208		0.0238736					733.082		1168.77		164.026				0.360819		0.57526		0.0807328
			439.127		16.2557		169.533				0.640166		0.0236978		0.247148					1103.97		1398.2		655.779				0.543369		0.688189		0.322771
			180.559		0.832938		121.392				0.263222		0.00121427		0.176968					985.866		1218.87		605.395				0.485238		0.599922		0.297972
			803.788		45.8902		176.255				1.17177		0.0668995		0.256947					1389.88		0		311.659				0.684093		0		0.153397
			1901.9		79.5528		1328.82				2.77263		0.115973		1.93717					2533.02		1588.13		179.669				1.24674		0.781668		0.088432
			82.0468		13.7004		1415.31				0.119609		0.0199727		2.06327					1926.43		1386.6		396.137				0.948178		0.682479		0.194977
			375.514		100.4		3.24547				0.547431		0.146364		0.0047313					755.973		761.932		11.0114				0.372086		0.375019		0.00541974
			14.6485		297.505		247.394				0.0213548		0.433708		0.360655					837.422		1913.2		636.833				0.412175		0.941667		0.313446
			126.148		1.04347		596.753				0.183901		0.00152119		0.869957					1309.56		916.035		227.183				0.644561		0.450868		0.111819
			136.806		40.6421		389.812				0.199437		0.0592487		0.568274					907.778		988.888		784.422				0.446804		0.486726		0.386089
			1108.7		15.7618		452.705				1.61628		0.0229778		0.65996					1902.15		1476.9		449.33				0.93623		0.726923		0.221158
		Ave. of			24.2208		148.518						0.0353095		0.216512				Ave. of			1203.31		714.974						0.592265		0.351906
		rel. intensities			19.0381		179.552						0.0277541		0.261754				rel. intensities			591.986		515.946						0.291373		0.253946
		685.957					217.315								0.316806				2031.72					254.146								0.125089
		Exp 3	452.312	2178.06	210.866	91.9868	213.223	479.971		Exp 3	0.559686	2.6951	0.260923	0.113823	0.263839	0.593911			Exp 3	1343.67	5050.69	230.471	3991.09	539.06	1609.03		Exp 3	0.745569	2.80249	0.127882	2.21455	0.29911	0.892808
			420.005	5379.37	274.774	240.084	363.462	2965.36			0.51971	6.65637	0.340003	0.297077	0.449744	3.6693				4115.76	5115.43	1892.92	3244.33	109.435	1960.2			2.28373	2.83842	1.05033	1.80019	0.0607228	1.08766
			249.29	6590.03	130.38		430.056				0.308468	8.15443	0.16133		0.532146					4219.83	4528.88	937.2		561.868				2.34147	2.51295	0.520027		0.311766
			1792.31	2054.33	676.877		246.864				2.21779	2.542	0.837559		0.305467					2148.91	2892.04	2543.31		1053.47				1.19237	1.60472	1.41122		0.584541
			2498.57	760.271	322.808		714.955				3.09171	0.94075	0.399439		0.884677					2707.34	4338.33	1763.9		599.461				1.50223	2.40722	0.978739		0.332625
			407.936	927.217	37.4449		918.568				0.504775	1.14733	0.0463339		1.13662					1134.72	3967.62	1443.76		638.349				0.629624	2.20153	0.801106		0.354203
			305.486	2145.03	138.624		771.93				0.378005	2.65423	0.171531		0.955177					2439.35	2356.74	1418.98		583.834				1.35353	1.30769	0.787355		0.323954
			1032.45	4702.2	344.221		417.927				1.27754	5.81845	0.425934		0.517138					1629.27	5297.82	2256.6		415.28				0.904036	2.93962	1.25213		0.230428
			842.586	7334.24	220.911		375.227				1.04261	9.0753	0.273352		0.464301					2091.63	5151.44	281.953		504.363				1.16059	2.85839	0.156448		0.279858
			935.892	1578.37	246.868		822.885				1.15806	1.95305	0.305472		1.01823					4596.64	1014.55	2249.77		945.574				2.55055	0.562947	1.24834		0.524674
			956.554		333.058		273.125				1.18363		0.412122		0.337962					2963.29		2363.92		329.657				1.64425		1.31168		0.182918
			474.857		152.396		471.465				0.587583		0.188573		0.583385					1646.06		345.394		454.882				0.913353		0.19165		0.252402
			531.805		146.063		119.842				0.658049		0.180737		0.148291					884.359		1581.77		333.821				0.490707		0.877681		0.185228
			711.215		138.434		683.959				0.880049		0.171297		0.846324					1228.74		1778.15		695.122				0.681795		0.986645		0.385705
			866.132		81.5684		73.0837				1.07174		0.100932		0.0904329					1370.71		1558.22		717.861				0.760572		0.864615		0.398322
			138.819		230.375		247.375				0.171774		0.285063		0.306099					1122.78		3116.12		421.067				0.622999		1.72905		0.233639
			258.902		265.46		174.57				0.320362		0.328478		0.216011					1577.34		640.027		276.98				0.875222		0.355134		0.153689
			1463.19		93.4355		1569.95				1.81053		0.115616		1.94263					1237.37		2419.86		637.946				0.686584		1.34271		0.353979
			912.412		0		108.394				1.12901		0		0.134125					2085.5		455.781		0				1.15719		0.252901		0
			928.561		15.1817		65.6141				1.14899		0.0187856		0.0811901					860.151		1684.38		538.704				0.477275		0.934619		0.298912
			1505.5		16.6907		68.0148				1.86289		0.0206529		0.0841607					938.373		1406.36		542.355				0.520678		0.780354		0.300938
			1393.2		30.1174		1694.23				1.72392		0.0372669		2.09643					505.769		1119.45		527.895				0.280638		0.621155		0.292915
			112.388		48.5317		331.015				0.139068		0.0600526		0.409595					919.755		1456.66		506.017				0.510347		0.80826		0.280775
			836.026		62.2236		2.86521				1.03449		0.0769948		0.00354537					599.161		670.282		256.87				0.332458		0.371922		0.14253
			177.45		112.32		486.246				0.219574		0.138984		0.601675					688.872		1318.26		638.785				0.382237		0.731468		0.354445
					294.723		1893.78						0.364687		2.34334							1580.46		781.166						0.876957		0.433448
		Ave. of			222.484		160.094						0.275299		0.198098				Ave. of			1931.15		160.024						1.07154		0.0887931
		rel. intensities			102.207		1007.78						0.126469		1.24701				rel. intensities			2106.43		377.417						1.1688		0.209419
		808.154			128.108								0.158519						1802.21			599.055								0.332399
											1	3.90729	0.233597	0.508628	0.671569	1.81537												1	1.7112	0.674478	1.50997	0.224996	0.754584
			mGFP-Vpr
		Total	shLuc	shVprBP	shPlk4
		Exp 1	36	30	30
		Exp 2	38	30	30
		Exp 3	35	31	30

## Sheet: Fig. 4d, e
	Fig. 4d																										Fig. 4e
					P value											% Plk4 ring or dot												% Cells with Sas6											% Cells with CP110 ≥ 5
		mGFP	mGFP-Vpr		<0.0001	****											DMSO		MG132									Mean	n = 0	1 ≤ n ≤ 2	n ≥ 3									Mean	S.D.
		mGFP-Vpr	mGFP-Vpr(1–79)		<0.0001	****											mGFP		mGFP		mGFP-Vpr		mGFP-Vpr(1–79)					mGFP	34.0651	64.8483	1.08664								mGFP	0.948247	0.0700408
																	Ring	Dot	Ring	Dot	Ring	Dot	Ring	Dot				mGFP-Vpr	21.135	62.0264	16.8386								mGFP-Vpr	28.1105	2.12861
																Mean	23.917	76.083	75.0163	24.9837	35.7836	64.2164	69.4636	30.5364				mGFP-Vpr(1–79)	33.1067	65.5885	1.30476								mGFP-Vpr(1–79)	2.14408	0.127449
		mGFP intensity at centrosome														S.D.	1.69845	1.69845	2.66034	2.66034	2.65626	2.65626	3.33433	3.33433
			mGFP	mGFP-Vpr	mGFP-Vpr(1–79)		mGFP	mGFP-Vpr	mGFP-Vpr(1–79)		mGFP	mGFP-Vpr	mGFP-Vpr(1–79)															S.D.	n = 0	1 ≤ n ≤ 2	n ≥ 3								n ≥ 5			P value
		Exp 1	6.29178	82.0349	81.03	Exp 2	0.437906	87.1224	57.2198	Exp 3	2.3462	13.6335	54.9795							P value								mGFP	1.85289	2.06089	0.361342								mGFP	mGFP-Vpr		< 0.0001	****
			13.748	1.112	236.912		2.78281	2.61951	135.304		56.4474	34.8551	154.356			MG132	mGFP	mGFP-Vpr		<0.0001	****							mGFP-Vpr	2.49496	3.35824	1.24905								mGFP-Vpr	mGFP-Vpr(1–79)		< 0.0001	****
			123.105	16.3725	21.6348		11.1412	3.34978	10.8196		59.7814	8.18387	132.715				mGFP-Vpr	mGFP-Vpr(1–79)		0.0002	***							mGFP-Vpr(1–79)	2.96767	2.77129	0.436898
			136.121	161.553	0.962213		1.80424	53.6805	169.16		0.874188	93.7974	27.939				mGFP	mGFP-Vpr(1–79)		0.0872	ns
			11.4541	1.29046	1.38257		184.097	934.929	7.69121		14.7537	510.202	55.8311															n ≥ 3			P value								No. of cells with CP110 ≥ 5
			9.66657	31.4835	29.7801		65.978	1.27391	2.38617		13.36	162.238	110.549															mGFP	mGFP-Vpr		< 0.0001	****							Exp 1	n ≥ 5	Total		% Cells with CP110 ≥ 5
			5.57932	1131.61	291.568		111.597	42.3958	201.619		58.2956	137.427	85.8046			No. of Plk4 ring or dot						% Plk4 ring or dot						mGFP-Vpr	mGFP-Vpr(1–79)		< 0.0001	****							mGFP	4	417		0.959233
			5.20455	2.3621	74.6096		72.5542	180.542	211.611		20.0855	332.38	92.7451			Exp 1		Ring	Dot	Total		Ring	Dot																mGFP-Vpr	135	453		29.8013
			82.7365	6.33804	40.9096		17.7046	1207.84	88.9108		0.416	841.999	88.1177			DMSO	mGFP	55	164	219		25.1142	74.8858																mGFP-Vpr(1–79)	13	570		2.2807
			14.8007	5.82365	392.404		2.26818	7.03755	92.5123		8.36995	254.161	179.923			MG132	mGFP	117	33	150		78	22						No. of cells with Sas6					% Cells with Sas6
			2.05854	35.2326	56.388		11.1201	30.9115	133.534		3.5088	421.453	414.309				mGFP-Vpr	88	142	230		38.2609	61.7391					Exp 1	n=0	1≤n≤2	n≥3	Total		n=0	1≤n≤2	n≥3			Exp 2	n ≥ 5	Total		% Cells with CP110 ≥ 5
			4.07154	181.073	3.84567		13.2383	197.189	125.84		4.71991	71.1325	491.716				mGFP-Vpr(1–79)	107	39	146		73.2877	26.7123					mGFP	174	308	5	487		35.729	63.2444	1.02669			mGFP	4	458		0.873362
			203.2	149.968	2.0184		2.56757	104.527	42.4757		7.84874	180.986	63.2293															mGFP-Vpr	98	239	74	411		23.8443	58.1509	18.0049			mGFP-Vpr	138	479		28.81
			67.633	23.1378	50.9907		31.2473	3.70792	228.096		59.524	163.314	149.843			Exp 2		Ring	Dot	Total		Ring	Dot					mGFP-Vpr(1–79)	139	286	4	429		32.4009	66.6667	0.932401			mGFP-Vpr(1–79)	10	493		2.0284
			72.6199	404.129	178.859		15.1665	9.5874	25.4047		0.556	114.998	249.126			DMSO	mGFP	55	168	223		24.6637	75.3363
			13.4659	20.5295	41.3751		1.28969	8.4564	138.032		61.7159	259.127	205.688			MG132	mGFP	132	46	178		74.1573	25.8427					Exp 2	n=0	1≤n≤2	n≥3	Total		n=0	1≤n≤2	n≥3			Exp 3	n ≥ 5	Total		% Cells with CP110 ≥ 5
			2.1477	2.24007	86.1358		12.8917	11.2818	265.877		9.13977	16.9223	263.146				mGFP-Vpr	93	189	282		32.9787	67.0213					mGFP	169	354	4	527		32.0683	67.1727	0.759013			mGFP	5	494		1.01215
			4.96894	9.2685	12.6791		12.5258	225.948	66.3412		7.6	602.406	88.4168				mGFP-Vpr(1–79)	89	42	131		67.9389	32.0611					mGFP-Vpr	78	264	70	412		18.932	64.0777	16.9903			mGFP-Vpr	125	486		25.7202
			63.9129	4.72672	17.1859		223.429	2.9349	21.32		12.1733	141.004	9.03257															mGFP-Vpr(1–79)	154	341	9	504		30.5556	67.6587	1.78571			mGFP-Vpr(1–79)	10	471		2.12314
			26.515	192.235	18.6548		8.60653	361.334	69.1227		89.8362	1016.77	117.632			Exp 3		Ring	Dot	Total		Ring	Dot
			9.93889	3.12486	349.916		187.569	360.525	152.049		8.83959	984.292	203.235			DMSO	mGFP	49	174	223		21.9731	78.0269					Exp 3	n=0	1≤n≤2	n≥3	Total		n=0	1≤n≤2	n≥3
			0.93836	40.6029	126.426		89.1232	0.555142	7.54456		85.9448	200.989	138.283			MG132	mGFP	121	45	166		72.8916	27.1084					mGFP	140	261	6	407		34.398	64.1278	1.4742
			32.5918	119.258	12.9354		114.436	605.146	359.42		91.015	216.736	72.8472				mGFP-Vpr	65	115	180		36.1111	63.8889					mGFP-Vpr	105	325	79	509		20.6287	63.8507	15.5206
			43.9071	1435.85	19.678		114.344	2122.99	29.7012		116.258	674.646	132.237				mGFP-Vpr(1–79)	90	44	134		67.1642	32.8358					mGFP-Vpr(1–79)	152	261	5	418		36.3636	62.4402	1.19617
			75.0801	1458.83	11.832		11.8393	673.56	68.4765		6.6356	349.026	21.7311
			20.875	8.93827	1.07188		10.9246	4657.81	6.34777		4.77101	189.79	123.217				DMSO		MG132
			1.29741	1104.56	134.319		11.6258	2178.39	110.549		1.24942	787.345	199.465				mGFP		mGFP		mGFP-Vpr		mGFP-Vpr(1–79)
			47.1293	265.49	216.667		24.36	234.817	242.311		8.73256	665.689	1.68949				Ring	Dot	Ring	Dot	Ring	Dot	Ring	Dot
			11.8939	86.3065	174.177		107.532	396.011	66.4093		4.72909	2384.68	13.7684			Exp 1	25.1142	74.8858	78	22	38.2609	61.7391	73.2877	26.7123
			57.3832	3264.31	3.17833		91.9887	41.5633	42.2371		22.5504	693.066	101.297			Exp 2	24.6637	75.3363	74.1573	25.8427	32.9787	67.0213	67.9389	32.0611
			15.5826	1287.2			7.86044	815.584	19.3183		3.68591	206.292	98.832			Exp 3	21.9731	78.0269	72.8916	27.1084	36.1111	63.8889	67.1642	32.8358
			8.46375	5341.48			14.568	4783.25	132.996		125.21	613.199	258.13			Mean	23.917	76.083	75.0163	24.9837	35.7836	64.2164	69.4636	30.5364
			138.931	1454.33			16.2569	1182.01			95.0995	4340.3	102.196			S.D.	1.69845	1.69845	2.66034	2.66034	2.65626	2.65626	3.33433	3.33433
			92.3225	1104.96			22.0579	688.721			9.87237	3730.61	73.8573
			5.48319	124.642			5.55294	784.2			14.3889	4707.66
			19.598	224.58			2.49517	2011.28			36.375	3734.51
			112.933	2358.83			2.13301	5223.07			2.10722	202.549
				1639.05			120.638	155.644			22.3045	1640.76
				2144.85				886.164				433.936
				4081.28				2962.98				1064.6
				2519.36				924.085				1517
								230.278				371.487
												1690.75
		Total	mGFP	mGFP-Vpr	mGFP-Vpr(1–79)
		Exp 1	37	41	30
		Exp 2	38	42	32
		Exp 3	38	43	34

## Sheet: Fig. 5b, c
	Fig. 5b														Fig. 5c
		% Cells with multi-Centrosome														% Cells
			mGFP		mGFP-Vpr		mGFP-Vpr		mGFP-Vpr(1–79)		mGFP-Vpr						mGFP		mGFP-Vpr
			mCherry		mCherry		mCh-VprBP		mCh-VprBP		mCh-VprBP(1–1427)						siLuc		siLuc		siCul4A		siDDB1
		Mean	1.09123		18.0914		36.328		1.11697		9.738						1≤n≤2	n≥3	1≤n≤2	n≥3	1≤n≤2	n≥3	1≤n≤2	n≥3
		S.D.	0.38386		0.55067		2.71491		0.372622		1.64512					Mean	99.0858	0.817676	79.5745	19.0021	78.7227	20.4494	75.4984	22.8399
																S.D.	0.382297	0.304234	1.22596	1.33007	1.86092	1.88383	1.95591	2.03877
							P value
		mGFP/mCh		mGFP-Vpr/mCh			<0.0001	****											P value
		mGFP-Vpr/mCh		mGFP-Vpr/mCh-VprBP			0.0003	***								siLuc	mGFP	mGFP-Vpr	<0.0001	****
		mGFP-Vpr/mCh-VprBP		mGFP-Vpr(1–79)/mCh-VprBP			<0.0001	****								mGFP-Vpr	siLuc	siCul4A	0.3382	ns
		mGFP-Vpr/mCh-VprBP		mGFP-Vpr/mCh-VprBP(1–1427)			0.0001	***									siLuc	siDDB1	0.0524	ns
		No. of cells with multi-Centrosome														No. of cells						% Cells
			mGFP		mGFP-Vpr		mGFP-Vpr		mGFP-Vpr(1–79)		mGFP-Vpr					Exp 1		1 ≤ n ≤ 2	n ≥ 3	Total		1 ≤ n ≤ 2	n ≥ 3
			mCherry		mCherry		mCh-VprBP		mCh-VprBP		mCh-VprBP(1–1427)					mGFP	siLuc	601	7	609		98.6864	1.14943
			n ≥ 3	Total	n ≥ 3	Total	n ≥ 3	Total	n ≥ 3	Total	n ≥ 3	Total				mGFP-Vpr	siLuc	543	142	694		78.2421	20.4611
		Exp 1	1	154	35	189	62	159	1	144	14	134					siCul4A	509	132	647		78.6708	20.4019
		Exp 2	2	156	32	175	55	151	2	143	18	165					siDDB1	499	165	675		73.9259	24.4444
		Exp 3	2	149	29	166	48	143	2	159	11	140
																Exp 2		1 ≤ n ≤ 2	n ≥ 3	Total		1 ≤ n ≤ 2	n ≥ 3
		% Cells with multi-Centrosome														mGFP	siLuc	721	4	725		99.4483	0.551724
			mGFP		mGFP-Vpr		mGFP-Vpr		mGFP-Vpr(1–79)		mGFP-Vpr					mGFP-Vpr	siLuc	645	151	808		79.8267	18.6881
			mCherry		mCherry		mCh-VprBP		mCh-VprBP		mCh-VprBP(1–1427)						siCul4A	509	148	662		76.8882	22.3565
		Exp 1	0.649351		18.5185		38.9937		0.694444		10.4478						siDDB1	471	148	629		74.8808	23.5294
		Exp 2	1.28205		18.2857		36.4238		1.3986		10.9091
		Exp 3	1.34228		17.4699		33.5664		1.25786		7.85714					Exp 3		1 ≤ n ≤ 2	n ≥ 3	Total		1 ≤ n ≤ 2	n ≥ 3
		Mean	1.09123		18.0914		36.328		1.11697		9.738					mGFP	siLuc	791	6	798		99.1228	0.75188
		S.D.	0.38386		0.55067		2.71491		0.372622		1.64512					mGFP-Vpr	siLuc	542	120	672		80.6548	17.8571
																	siCul4A	503	116	624		80.609	18.5897
																	siDDB1	484	128	623		77.6886	20.5457
																	mGFP		mGFP-Vpr
																	siLuc		siLuc		siCul4A		siDDB1
																	1≤n≤2	n≥3	1≤n≤2	n≥3	1≤n≤2	n≥3	1≤n≤2	n≥3
																Exp 1	98.6864	1.14943	78.2421	20.4611	78.6708	20.4019	73.9259	24.4444
																Exp 2	99.4483	0.551724	79.8267	18.6881	76.8882	22.3565	74.8808	23.5294
																Exp 3	99.1228	0.75188	80.6548	17.8571	80.609	18.5897	77.6886	20.5457
																Mean	99.0858	0.817676	79.5745	19.0021	78.7227	20.4494	75.4984	22.8399
																S.D.	0.382297	0.304234	1.22596	1.33007	1.86092	1.88383	1.95591	2.03877

## Sheet: Fig. 6a, b
	Fig. 6a																				Fig. 6b
		% TZM-bl cells																				% TZM-bl cells with multi-centrosomes
		Mean	1 ≤ n ≤ 2	3 ≤ n ≤ 4	n ≥ 5		3 ≤ n ≤ 4			P value														Mean	S.D.					P value
		Uninfected	96.0462	3.95385	0		Uninfected	HIV-1		<0.0001	****											shLuc	Uninfected	3.38408	0.3349		shLuc	Uninfected	HIV-1	<0.0001	****
		HIV-1	42.0264	29.2883	27.4005		HIV-1	HIV-1 Vpr(1–79)		0.0005	***												HIV-1	69.3115	3.45681		shVprBP	Uninfected	HIV-1	0.0031	**
		HIV-1 Vpr(1–79)	81.3452	15.859	0.757317		HIV-1	HIV-1 Vpr(-)		0.0017	**											shVprBP	Uninfected	3.06512	0.396351		Uninfected	shLuc	shVprBP	0.347	ns
		HIV-1 Vpr(-)	79.0137	16.4476	1.55781																		HIV-1	12.3886	2.50333		HIV-1	shLuc	shVprBP	<0.0001	****
							n ≥ 5			P value
		S.D.	1 ≤ n ≤ 2	3 ≤ n ≤ 4	n ≥ 5		Uninfected	HIV-1		0.0003	***
		Uninfected	0.215933	0.215933	0		HIV-1	HIV-1 Vpr(1–79)		0.0004	***											No. of TZM-bl cells with multi-centrosomes
		HIV-1	2.09595	2.27638	4.18969		HIV-1	HIV-1 Vpr(-)		0.0005	***												shLuc				shVprBP
		HIV-1 Vpr(1–79)	1.13157	0.394416	0.054438																		Uninfected		HIV-1		Uninfected		HIV-1
		HIV-1 Vpr(-)	3.04514	1.87558	0.677852																		n ≥ 3	Total	n ≥ 3	Total	n ≥ 3	Total	n ≥ 3	Total
																						Exp 1	7	232	151	209	6	222	38	254
																						Exp 2	9	260	153	218	7	233	30	245
		No. of TZM-bl cells																				Exp 3	9	245	150	229	9	258	25	251
			Uninfected				HIV-1				HIV-1 Vpr(1–79)				HIV-1 Vpr(-)
			1 ≤ n ≤ 2	3 ≤ n ≤ 4	n ≥ 5	Total	1 ≤ n ≤ 2	3 ≤ n ≤ 4	n ≥ 5	Total	1 ≤ n ≤ 2	3 ≤ n ≤ 4	n ≥ 5	Total	1 ≤ n ≤ 2	3 ≤ n ≤ 4	n ≥ 5	Total				% TZM-bl cells with multi-centrosomes
		Exp 1	205	8	0	213	82	56	66	207	197	40	2	246	164	40	5	217					shLuc				shVprBP
		Exp 2	229	10	0	239	92	67	50	212	218	41	2	265	166	30	2	204					Uninfected		HIV-1		Uninfected		HIV-1
		Exp 3	245	10	0	255	87	59	54	202	232	45	2	284	173	35	3	216				Exp 1	3.01724		72.2488		2.7027		14.9606
																						Exp 2	3.46154		70.1835		3.00429		12.2449
		% TZM-bl cells																				Exp 3	3.67347		65.5022		3.48837		9.96016
			Uninfected				HIV-1				HIV-1 Vpr(1–79)				HIV-1 Vpr(-)							Mean	3.38408		69.3115		3.06512		12.3886
			1 ≤ n ≤ 2	3 ≤ n ≤ 4	n ≥ 5		1 ≤ n ≤ 2	3 ≤ n ≤ 4	n ≥ 5		1 ≤ n ≤ 2	3 ≤ n ≤ 4	n ≥ 5		1 ≤ n ≤ 2	3 ≤ n ≤ 4	n ≥ 5					S.D.	0.3349		3.45681		0.396351		2.50333
		Exp 1	96.2441	3.75587	0		39.6135	27.0531	31.8841		80.0813	16.2602	0.813008		75.576	18.4332	2.30415
		Exp 2	95.8159	4.1841	0		43.3962	31.6038	23.5849		82.2642	15.4717	0.754717		81.3725	14.7059	0.980392
		Exp 3	96.0784	3.92157	0		43.0693	29.2079	26.7327		81.6901	15.8451	0.704225		80.0926	16.2037	1.38889
		Mean	96.0462	3.95385	0		42.0264	29.2883	27.4005		81.3452	15.859	0.757317		79.0137	16.4476	1.55781
		S.D.	0.215933	0.215933	0		2.09595	2.27638	4.18969		1.13157	0.394416	0.054438		3.04514	1.87558	0.677852

## Sheet: Fig. 6c, d
	Fig. 6c													Fig. 6d
		% CD4+ T cells with multi-centrosome													% CD4+ T cells
			Uninfected	HIV-1	HIV-1 Vpr(1–79)					P value						Chromosome number
		Mean	0.286024	18.9627	1.51844		Uninfected	HIV-1		0.0004	***				Mean	n ≤ 42	43	44	45	46	47	48				P value
		S.D.	0.104047	3.01935	0.379136		HIV-1	HIV-1 Vpr(1–79)		0.0006	***				Uninfected	0.668129	0.30581	2.17987	4.49007	91.6672	0.30581	0.383142		Uninfected	HIV-1	0.0006	***
															HIV-1	2.99181	5.15998	8.38725	8.20966	72.1562	2.03726	1.05788		HIV-1	HIV-1 Vpr(1-79)	0.0005	***
															HIV-1 Vpr(1–79)	1.03093	0.928838	1.84083	3.82011	91.7941	0.258398	0.326797		Uninfected	HIV-1 Vpr(1-79)	0.6692	ns
		No. of CD4+ T cells with multi-centrosome					% CD4+ T cells with multi-centrosome
		Exp 1	1 ≤ n ≤ 2	n ≥ 3	total		n ≥ 3									Chromosome number
		Uninfected	1147	2	1149		0.174064								S.D.	n ≤ 42	43	44	45	46	47	48
		HIV-1	764	140	904		15.4867								Uninfected	0.584792	0.529679	1.26543	0.996806	0.331431	0.529679	0.663621
		HIV-1 Vpr(1–79)	1022	13	1035		1.25604								HIV-1	0.899197	2.57226	1.4458	2.25449	3.34653	1.79933	1.14447
															HIV-1 Vpr(1–79)	1.78562	0.135438	0.987689	1.39312	0.343883	0.447558	0.56603
		Exp 2	1 ≤ n ≤ 2	n ≥ 3	total		n ≥ 3
		Uninfected	787	3	790		0.379747
		HIV-1	443	114	557		20.4668								No. of CD4+ T cells										% CD4+ T cells
		HIV-1 Vpr(1–79)	513	7	520		1.34615									Chromosome number										Chromosome number
															Exp 1	n≤42	43	44	45	46	47	48	Total		Exp 1	n≤42	43	44	45	46	47	48
		Exp 3	1 ≤ n ≤ 2	n ≥ 3	total		n ≥ 3								Uninfected	0	0	3	3	80	0	1	87		Uninfected	0	0	3.44828	3.44828	91.954	0	1.14943
		Uninfected	983	3	986		0.30426								HIV-1	2	2	7	6	66	3	2	88		HIV-1	2.27273	2.27273	7.95455	6.81818	75	3.40909	2.27273
		HIV-1	423	112	535		20.9346								HIV-1 Vpr(1–79)	3	1	1	3	89	0	0	97		HIV-1 Vpr(1–79)	3.09278	1.03093	1.03093	3.09278	91.7526	0	0
		HIV-1 Vpr(1–79)	753	15	768		1.95312
																Chromosome number										Chromosome number
		% CD4+ T cells with multi-centrosome													Exp 2	n≤42	43	44	45	46	47	48	Total		Exp 2	n≤42	43	44	45	46	47	48
			Uninfected	HIV-1	HIV-1 Vpr(1–79)										Uninfected	1	0	2	5	84	0	0	92		Uninfected	1.08696	0	2.17391	5.43478	91.3043	0	0
		Exp 1	0.174064	15.4867	1.25604										HIV-1	3	8	8	12	76	3	1	111		HIV-1	2.7027	7.20721	7.20721	10.8108	68.4685	2.7027	0.900901
		Exp 2	0.379747	20.4668	1.34615										HIV-1 Vpr(1–79)	0	1	3	3	94	0	1	102		HIV-1 Vpr(1–79)	0	0.980392	2.94118	2.94118	92.1569	0	0.980392
		Exp 3	0.30426	20.9346	1.95312
		Mean	0.286024	18.9627	1.51844											Chromosome number										Chromosome number
		S.D.	0.104047	3.01935	0.379136										Exp 3	n≤42	43	44	45	46	47	48	Total		Exp 3	n≤42	43	44	45	46	47	48
															Uninfected	1	1	1	5	100	1	0	109		Uninfected	0.917431	0.917431	0.917431	4.58716	91.7431	0.917431	0
															HIV-1	4	6	10	7	73	0	0	100		HIV-1	4	6	10	7	73	0	0
															HIV-1 Vpr(1–79)	0	1	2	7	118	1	0	129		HIV-1 Vpr(1–79)	0	0.775194	1.55039	5.42636	91.4729	0.775194	0

## Sheet: Sup. Fig. 4a, b
	Sup. Fig. 4a																							Sup. Fig. 4b
							Centrosome		P value									Nuclear		P value					% Cells with Plk4
							shLuc	shVprBP	<0.0001	****								shLuc	shVprBP	<0.0001	****				Mean		Ring	Ring + Dot	Dot		Dot		P value
							shLuc	Antigen blocking	<0.0001	****								shLuc	Antigen blocking	<0.0001	****				shLuc	mCherry	14.223	17.327	68.45		shLuc/mCh		<0.0001	****
																									shVprBP	mCherry	21.1942	27.4879	51.3179		shVprBP/mCh
		VprBP intensity (centrosome )					Rel. VprBP signal (centrosome)						VprBP intensity (nucleus )					Rel. VprBP signal (nucleus)								mCh-VprBP	16.318	21.7261	61.9559		shVprBP/mCh		0.0008	***
			shLuc	shVprBP	Antigen blocking			shLuc	shVprBP	Antigen blocking				shLuc	shVprBP	Antigen blocking			shLuc	shVprBP	Antigen blocking					mCh-VprBP(1–1427)	18.1513	26.3497	55.499		shVprBP/mCh-VprBP
		Exp 1	338.91	400.901	198.085		Exp 1	0.637972	0.754665	0.37288			Exp 1	686.08	210.277	58.5163		Exp 1	1.09615	0.335959	0.0934916										shVprBP/mCh-VprBP		0.0386	*
			856.113	207.809	90.1031			1.61157	0.391185	0.169612				611.595	114.51	53.9413			0.977146	0.182952	0.0861821				S.D.		Ring	Ring + Dot	Dot		shVprBP/mCh-VprBP(1–1427)
			621.597	218.071	151.06			1.17011	0.410501	0.284359				594.871	116.244	28.8446			0.950426	0.185723	0.0460851				shLuc	mCherry	2.15524	1.83539	1.10965		shVprBP/mCh		0.1216	ns
			297.204	283.839	90.594			0.559464	0.534304	0.170536				661.196	93.1906	42.4758			1.05639	0.148891	0.0678637				shVprBP	mCherry	3.15377	2.99121	1.45684		shVprBP/mCh-VprBP(1–1427)
			490.909	285.583	72.03			0.924098	0.537587	0.135591				510.376	152.513	35.5658			0.815429	0.24367	0.0568235					mCh-VprBP	1.38515	0.048535	1.43087
			438.933	115.537	93.1304			0.826257	0.217489	0.175311				875.493	170.334	65.0777			1.39878	0.272143	0.103975					mCh-VprBP(1–1427)	1.09798	2.45635	3.39574
			557.014	690.443	124.635			1.04854	1.2997	0.234615				526.455	176.521	53.9413			0.841119	0.282029	0.0861821
			291.426	378.636	38.4382			0.548587	0.712753	0.072357				785.761	120.633	51.7242			1.25541	0.192736	0.0826398				No. of cells with Plk4							% Cells with Plk4
			549.991	622.195	34.8727			1.03532	1.17123	0.0656452				557.506	106.632	48.2957			0.890728	0.170366	0.0771622				Exp 1		Ring	Ring + Dot	Dot	Total		Ring	Ring + Dot	Dot
			601.84	260.102	96.4226			1.13292	0.489622	0.181508				525.093	149.505	42.5448			0.838943	0.238865	0.0679739				shLuc	mCherry	13	21	74	108		12.037	19.4444	68.5185
			445.25	568.983	77.924			0.838148	1.07107	0.146686				676.892	137.144	28.5216			1.08147	0.219114	0.045569				shVprBP	mCherry	19	31	51	101		18.8119	30.6931	50.495
			573.06	295.671	143.444			1.07874	0.556577	0.270023				961.877	164.038	34.0369			1.53679	0.262083	0.0543808					mCh-VprBP	18	22	61	101		17.8218	21.7822	60.396
			474.925	253.883	56.3782			0.894009	0.477915	0.106128				530.125	121.288	79.1316			0.846982	0.193783	0.126429					mCh-VprBP(1–1427)	16	24	53	93		17.2043	25.8065	56.9892
			674.576	359.84	86.1595			1.26984	0.677371	0.162188				753.72	254.748	52.7682			1.20422	0.407011	0.0843078
			708.982	200.81	157.332			1.3346	0.378009	0.296165				537.768	117.393	94.7155			0.859192	0.187558	0.151327				Exp 2		Ring	Ring + Dot	Dot	Total		Ring	Ring + Dot	Dot
			657.328	339.918	83.7147			1.23737	0.639869	0.157586				541.84	28.1538	15.3844			0.865698	0.0449813	0.0245797				shLuc	mCherry	17	17	70	104		16.3462	16.3462	67.3077
			325.971	244.36	154.479			0.613615	0.459989	0.290794				606.132	84.4506	66.2665			0.968418	0.134927	0.105874				shVprBP	mCherry	20	27	53	100		20	27	53
			286.688	211.754	187.017			0.539668	0.398611	0.352044				659.249	129.215	24.3056			1.05328	0.206447	0.0388331					mCh-VprBP	16	23	67	106		15.0943	21.6981	63.2075
			710.669	235.414	103.655			1.33778	0.443149	0.195123				469.756	116.936	73.9443			0.750531	0.186829	0.118141					mCh-VprBP(1–1427)	17	23	55	95		17.8947	24.2105	57.8947
			575.961	334.905	206.355			1.0842	0.630432	0.388447				588.493	100.946	44.8287			0.940236	0.161282	0.0716229
		Ave. of	637.643	501.763	195.93			1.20031	0.94453	0.368823				709.791	104.468	71.5591			1.13404	0.166908	0.11433				Exp 3		Ring	Ring + Dot	Dot	Total		Ring	Ring + Dot	Dot
		rel. intensities	674.054	332.17	152.097			1.26885	0.625283	0.286312			Ave. of	766.67	116.482	79.4032			1.22491	0.186104	0.126863				shLuc	mCherry	15	17	73	105		14.2857	16.1905	69.5238
		531.231	429.257	494.569				0.808044	0.930988				rel. intensities	547.119	56.6319	64.2159			0.874134	0.090481	0.102598				shVprBP	mCherry	27	27	55	109		24.7706	24.7706	50.4587
		Exp 2	577.732	338.131	136.657		Exp 2	0.804011	0.470567	0.190181			625.899	337.716		79.4032			0.539569		0.126863					mCh-VprBP	17	23	66	106		16.0377	21.6981	62.2642
			718.807	220.443	375.372			1.00034	0.306783	0.522394			Exp 2	588.081	162.905	64.4266		Exp 2	0.925209	0.256293	0.10136					mCh-VprBP(1–1427)	18	27	48	93		19.3548	29.0323	51.6129
			523.735	403.22	244.851			0.728865	0.561149	0.340751				779.597	134.919	68.9409			1.22652	0.212264	0.108462
			325.018	468.908	149.469			0.452318	0.652564	0.208012				568.255	87.7976	97.7961			0.894018	0.138129	0.153859
			669.756	377.029	112.303			0.932079	0.5247	0.156289				603.412	88.5097	93.3296			0.949329	0.139249	0.146832
			617.77	299.333	48.2531			0.859731	0.416573	0.0671523				435.752	134.175	96.4591			0.685555	0.211093	0.151756
			664.553	180.552	55.7136			0.924838	0.251269	0.0775349				696.334	78.9174	89.3613			1.09552	0.124158	0.140589
			682.109	282.268	74.3459			0.94927	0.392824	0.103465				426.472	93.663	126.927			0.670955	0.147357	0.19969
			691.04	324.613	134.12			0.961699	0.451754	0.18665				425.49	100.65	117.651			0.66941	0.15835	0.185096
			1009.82	165.741	230.89			1.40534	0.230657	0.321323				493.556	175.56	71.1891			0.776496	0.276203	0.112
			932.543	336.743	103.882			1.29779	0.468635	0.14457				831.711	223.919	100.138			1.3085	0.352284	0.157544
			1153.78	241.36	135.13			1.60568	0.335893	0.188056				569.635	132.092	109.263			0.896189	0.207817	0.171899
			992.841	428.284	112.608			1.38171	0.596029	0.156713				692.734	128.64	87.5387			1.08986	0.202385	0.137722
			581.47	386.498	89.5708			0.809213	0.537877	0.124653				924.109	126.749	109.877			1.45387	0.199411	0.172866
			552.123	287.989	123.146			0.768372	0.400785	0.171379				693.305	289.909	75.6991			1.09076	0.456104	0.119095
			236.472	355.494	154.943			0.329091	0.49473	0.215629				451.789	89.1019	101.698			0.710784	0.140181	0.159998
			1397.87	667.383	75.18			1.94537	0.928776	0.104626				492.441	144.852	107.95			0.774742	0.227891	0.169834
			821.369	533.314	90.0878			1.14307	0.742197	0.125372				390.323	76.1792	91.087			0.614082	0.11985	0.143304
			606.72	582.506	121.517			0.844353	0.810656	0.169112				914.893	134.806	82.6665			1.43937	0.212086	0.130057
			845.312	235.704	192.74			1.17639	0.328021	0.268231				621.122	148.591	87.4345			0.977192	0.233773	0.137558
		Ave. of	511.621	633.306	137.456			0.712006	0.881352	0.191294				1098.58	196.615	98.2776			1.72836	0.309328	0.154617
		rel. intensities	848.643	363.733	116.269			1.18103	0.506196	0.161808				551.41	141.201	58.9321			0.867516	0.222147	0.092716
		718.562	565.818	403.907				0.787431	0.562104				Ave. of	820.723	70.38	67.3627			1.29122	0.110727	0.10598
		Exp 3	791.884	388.702	125.86		Exp 3	1.17103	0.574809	0.186121			rel. intensities	370.682	187.122	63.9615			0.583181	0.294394	0.100629
			875.955	450.036	117.056			1.29535	0.665508	0.173101			635.62	814.463		54.739			1.28137		0.0861191
			692.535	213.664	184.878			1.02411	0.315963	0.273396			Exp 3	676.755	141.201	81.2873		Exp 3	0.921751	0.192318	0.110715
			891.272	286.499	162.71			1.318	0.423672	0.240614				710.454	148.591	81.01			0.967651	0.202383	0.110337
			429.868	82.18	184.801			0.635685	0.121527	0.273282				405.777	74.599	108.887			0.552675	0.101605	0.148305
			621.157	465.461	254.974			0.91856	0.688319	0.377053				521.708	110.26	101.781			0.710575	0.150176	0.138628
			838.336	216.699	200.115			1.23972	0.320452	0.295928				668.616	105.443	66.7829			0.910667	0.143615	0.0909595
			629.739	585.623	70.7			0.931252	0.866013	0.10455				1096.57	192.992	107.331			1.49355	0.262859	0.146187
			563.779	627.605	153.039			0.833709	0.928096	0.226312				754.52	176.735	109.732			1.02767	0.240716	0.149457
			1274.34	212.62	148.898			1.88448	0.314421	0.220189				624.743	189.397	81.6518			0.85091	0.257962	0.111211
			982.341	273.42	153.286			1.45268	0.40433	0.226678				671.35	142.811	73.3717			0.91439	0.194512	0.0999335
			335.829	211.473	346.658			0.49662	0.312725	0.512634				739.902	83.8087	92.2541			1.00776	0.114149	0.125652
			618.011	324.738	180.366			0.913907	0.480218	0.266723				728.454	142.054	57.8791			0.992166	0.19348	0.0788323
			808.226	226.454	112.58			1.1952	0.334877	0.166482				394.423	91.5794	107.968			0.537211	0.124733	0.147055
			553.352	263.314	100.975			0.818291	0.389386	0.149321				514.728	159.438	79.0168			0.701068	0.217157	0.107622
			372.619	536.181	62.8233			0.551024	0.792898	0.0929024				417.064	84.6479	85.7692			0.568048	0.115292	0.116819
			554.835	259.916	163.168			0.820483	0.38436	0.241291				624.289	105.028	94.4925			0.850292	0.143049	0.1287
			723.778	192.173	84.1451			1.07032	0.284183	0.124433				1323.17	115.188	61.732			1.80217	0.156888	0.08408
			631.36	204.802	139.812			0.933648	0.30286	0.206752				1022.63	68.7906	60.0682			1.39284	0.0936939	0.0818139
			434.251	274.651	80.6711			0.642166	0.40615	0.119296				1029.16	61.8483	103.028			1.40174	0.0842384	0.140325
			1127.03	244.09	99.9188			1.66663	0.360958	0.147759				689.967	57.0203	75.0874			0.939746	0.0776626	0.10227
		Ave. of	499.569	237.629	295.889			0.738757	0.351403	0.437558				1001.26	44.9033	95.2604			1.36373	0.061159	0.129746
		rel. intensities	303.209	258.274	206.432			0.448383	0.381932	0.305269				948.45	38.2193	95.2604			1.2918	0.0520553	0.129746
		676.229		286.854					0.424197					457.645	75.3295	72.4951			0.62332	0.1026	0.0987395
													Ave. of	602.831	66.9986	63.7457			0.821066	0.0912532	0.0868228
								1	0.534774	0.215606			rel. intensities	963.038	78.3096	103.216			1.31167	0.106659	0.140582
													734.205	767.632		113.094			1.04553		0.154036
																			1	0.187608	0.114497
		Total	shGL	shVprBP	Antigen blocking								Total	shGL	shVprBP	Antigen blocking
		Exp 1	23	23	22								Exp 1	24	23	24
		Exp 2	23	23	22								Exp 2	24	23	24
		Exp 3	23	24	23								Exp 3	24	23	24

## Sheet: Sup. Fig. 4d, g
	Sup. Fig. 4d													Sup. Fig. 4g
		% Cells with Sas6															No. of cells with multi-centrosome					% Cells with multi-centrosome				% Cells with multi-centrosome
		Mean	n = 0	1 ≤ n ≤ 2	n ≥ 3					P value					MG132	Exp 1	3	4	n ≥ 5	Total		3	4	n ≥ 5		Mean	Cen. #	3	4	n ≥ 5
		Puro	11.7156	86.7868	1.49763		Puro	HA-Vpr		<0.0001	****					mGFP	3	3	0	554		0.541516	0.541516	0		MG132	mGFP	0.785813	0.622624	0
		HA-Vpr	7.82614	52.3035	39.8703		Puro	HA-Vpr (K27M)		<0.0001	****					mGFP-Vpr	38	85	20	667		5.69715	12.7436	2.9985			mGFP-Vpr	5.52179	11.8323	3.0232
		HA-Vpr (K27M)	17.1023	57.2446	25.6531		HA-Vpr	HA-Vpr (K27M)		<0.0001	****					mGFP-Vpr(1–79)	7	10	0	625		1.12	1.6	0			mGFP-Vpr(1–79)	1.0899	1.35316	0
																										Asyn	mGFP	0.655078	0.647736	0
		S.D.	n = 0	1 ≤ n ≤ 2	n ≥ 3											Exp 2	3	4	n ≥ 5	Total		3	4	n ≥ 5			mGFP-Vpr	5.16868	11.136	2.76195
		Puro	1.10995	1.65734	0.566623											mGFP	5	4	0	576		0.868056	0.694444	0			mGFP-Vpr(1–79)	0.783894	1.28535	0
		HA-Vpr	2.86736	1.78687	1.09942											mGFP-Vpr	39	78	16	637		6.12245	12.2449	2.51177		Thy	mGFP	0.679592	0.250102	0
		HA-Vpr (K27M)	2.27555	3.03961	0.764139											mGFP-Vpr(1–79)	6	7	0	609		0.985222	1.14943	0			mGFP-Vpr	6.544	8.78589	1.93422
																											mGFP-Vpr(1–79)	1.13756	0.843214	0.0597372
																Exp 3	3	4	n ≥ 5	Total		3	4	n ≥ 5		Noc	mGFP	0.823674	0.834196	0.0620732
		No. of cells with Sas6						% Cells with Sas6								mGFP	6	4	0	633		0.947867	0.631912	0			mGFP-Vpr	7.82651	14.8731	3.01735
		Exp 1	n = 0	1 ≤ n ≤ 2	n ≥ 3	Total		n = 0	1 ≤ n ≤ 2	n ≥ 3						mGFP-Vpr	28	62	21	590		4.74576	10.5085	3.55932			mGFP-Vpr(1–79)	1.08211	2.73768	0
		Puro	25	174	4	203		12.3153	85.7143	1.97044						mGFP-Vpr(1–79)	8	9	0	687		1.16448	1.31004	0
		HA-Vpr	23	104	80	207		11.1111	50.2415	38.6473																S.D.	Cen. #	3	4	n ≥ 5
		HA-Vpr (K27M)	38	119	55	212		17.9245	56.1321	25.9434							No. of cells with multi-centrosome					% Cells with multi-centrosome				MG132	mGFP	0.215298	0.076886	0
															Asyn	Exp 1	3	4	n ≥ 5	Total		3	4	n ≥ 5			mGFP-Vpr	0.704898	1.1733	0.524211
		Exp 2	n = 0	1 ≤ n ≤ 2	n ≥ 3	Total		n = 0	1 ≤ n ≤ 2	n ≥ 3						mGFP	4	3	0	534		0.749064	0.561798	0			mGFP-Vpr(1–79)	0.0933441	0.22836	0
		Puro	12	102	1	115		10.4348	88.6957	0.869565						mGFP-Vpr	38	82	19	680		5.58824	12.0588	2.79412		Asyn	mGFP	0.125968	0.178766	0
		HA-Vpr	6	55	42	103		5.82524	53.3981	40.7767						mGFP-Vpr(1–79)	9	8	0	757		1.1889	1.0568	0			mGFP-Vpr	0.690624	0.838714	0.897556
		HA-Vpr (K27M)	17	71	29	117		14.5299	60.6838	24.7863																	mGFP-Vpr(1–79)	0.436821	0.229177	0
																Exp 2	3	4	n ≥ 5	Total		3	4	n ≥ 5		Thy	mGFP	0.525851	0.113323	0
		Exp 3	n = 0	1 ≤ n ≤ 2	n ≥ 3	Total		n = 0	1 ≤ n ≤ 2	n ≥ 3						mGFP	4	3	0	568		0.704225	0.528169	0			mGFP-Vpr	0.988503	0.849191	1.07324
		Puro	15	104	2	121		12.3967	85.9504	1.65289						mGFP-Vpr	33	62	11	595		5.54622	10.4202	1.84874			mGFP-Vpr(1–79)	0.251067	0.802167	0.103468
		HA-Vpr	7	57	43	107		6.54206	53.271	40.1869						mGFP-Vpr(1–79)	2	8	0	623		0.321027	1.28411	0		Noc	mGFP	0.339901	0.127577	0.107514
		HA-Vpr (K27M)	23	67	32	122		18.8525	54.918	26.2295																	mGFP-Vpr	0.747235	1.68466	2.14209
																Exp 3	3	4	n ≥ 5	Total		3	4	n ≥ 5			mGFP-Vpr(1–79)	0.580035	0.400398	0
																mGFP	3	5	0	586		0.511945	0.853242	0
																mGFP-Vpr	24	60	20	549		4.37158	10.929	3.64299					P value
																mGFP-Vpr(1–79)	5	9	0	594		0.841751	1.51515	0		MG132	mGFP	mGFP-Vpr	< 0.0001	****
																											mGFP-Vpr	mGFP-Vpr(1–79)	< 0.0001	****
																	No. of cells with multi-centrosome					% Cells with multi-centrosome				Asyn	mGFP	mGFP-Vpr	< 0.0001	****
															Thy	Exp 1	3	4	n ≥ 5	Total		3	4	n ≥ 5			mGFP-Vpr	mGFP-Vpr(1–79)	< 0.0001	****
																mGFP	2	2	0	525		0.380952	0.380952	0		Thy	mGFP	mGFP-Vpr	0.0002	***
																mGFP-Vpr	51	80	27	894		5.7047	8.94855	3.02013			mGFP-Vpr	mGFP-Vpr(1–79)	0.0003	***
																mGFP-Vpr(1–79)	5	0	1	558		0.896057	0	0.179211		Noc	mGFP	mGFP-Vpr	< 0.0001	****
																											mGFP-Vpr	mGFP-Vpr(1–79)	< 0.0001	****
																Exp 2	3	4	n ≥ 5	Total		3	4	n ≥ 5		mGFP-Vpr	MG132	Asyn	0.3003	ns
																mGFP	7	1	0	544		1.28676	0.183824	0		mGFP-Vpr	Asyn	Thy	0.2701	ns
																mGFP-Vpr	36	45	5	572		6.29371	7.86713	0.874126		mGFP-Vpr	Asyn	Noc	0.006	**
																mGFP-Vpr(1–79)	7	8	0	501		1.39721	1.59681	0
																Exp 3	3	4	n ≥ 5	Total		3	4	n ≥ 5
																mGFP	2	1	0	539		0.371058	0.185529	0
																mGFP-Vpr	40	50	10	524		7.63359	9.54198	1.9084
																mGFP-Vpr(1–79)	6	5	0	536		1.1194	0.932836	0
																	No. of cells with multi-centrosome					% Cells with multi-centrosome
															Noc	Exp 1	3	4	n ≥ 5	Total		3	4	n ≥ 5
																mGFP	3	5	1	537		0.558659	0.931099	0.18622
																mGFP-Vpr	48	92	20	591		8.12183	15.5668	3.38409
																mGFP-Vpr(1–79)	9	12	0	526		1.71103	2.28137	0
																Exp 2	3	4	n ≥ 5	Total		3	4	n ≥ 5
																mGFP	7	4	0	580		1.2069	0.689655	0
																mGFP-Vpr	39	90	4	559		6.97674	16.1002	0.715564
																mGFP-Vpr(1–79)	3	16	0	528		0.568182	3.0303	0
																Exp 3	3	4	n ≥ 5	Total		3	4	n ≥ 5
																mGFP	4	5	0	567		0.705467	0.881834	0
																mGFP-Vpr	44	68	26	525		8.38095	12.9524	4.95238
																mGFP-Vpr(1–79)	5	15	0	517		0.967118	2.90135	0

## Sheet: Sup. Fig. 6b
	Sup. Fig. 6b
		% CEM-SS cells
		Mean	1 ≤ n ≤ 2	3 ≤ n ≤ 4	n ≥ 5			3 ≤ n ≤ 4			P value
		Uninfected	99.1714	0.828579	0			Uninfected	HIV-1		<0.0001	****
		HIV-1	57.7317	34.7139	6.15796			HIV-1	HIV-1 Vpr(1–79)		<0.0001	****
		HIV-1 Vpr(1–79)	87.0978	8.46856	0			HIV-1	HIV-1 Vpr(-)		0.0002	***
		HIV-1 Vpr(-)	85.045	10.5994	0.144928
								n ≥ 5			P value
		S.D.	1 ≤ n ≤ 2	3 ≤ n ≤ 4	n ≥ 5			Uninfected	HIV-1		0.0005	***
		Uninfected	0.61149	0.61149	0			HIV-1	HIV-1 Vpr(1–79)		0.0005	***
		HIV-1	2.47819	1.86562	1.00873			HIV-1	HIV-1 Vpr(-)		0.0006	***
		HIV-1 Vpr(1–79)	0.865904	0.378806	0
		HIV-1 Vpr(-)	1.67169	2.40481	0.251022
		No. of CEM-SS cells
			Uninfected				HIV-1				HIV-1 Vpr(1–79)				HIV-1 Vpr(-)
			1 ≤ n ≤ 2	3 ≤ n ≤ 4	n ≥ 5	Total	1 ≤ n ≤ 2	3 ≤ n ≤ 4	n ≥ 5	Total	1 ≤ n ≤ 2	3 ≤ n ≤ 4	n ≥ 5	Total	1 ≤ n ≤ 2	3 ≤ n ≤ 4	n ≥ 5	Total
		Exp 1	300	2	0	302	143	92	18	254	219	22	0	254	200	18	1	230
		Exp 2	327	5	0	332	134	84	15	238	230	23	0	264	187	27	0	223
		Exp 3	314	1	0	315	143	77	12	236	219	20	0	249	199	28	0	236
		% CEM-SS cells
			Uninfected				HIV-1				HIV-1 Vpr(1–79)				HIV-1 Vpr(-)
			1 ≤ n ≤ 2	3 ≤ n ≤ 4	n ≥ 5		1 ≤ n ≤ 2	3 ≤ n ≤ 4	n ≥ 5		1 ≤ n ≤ 2	3 ≤ n ≤ 4	n ≥ 5		1 ≤ n ≤ 2	3 ≤ n ≤ 4	n ≥ 5
		Exp 1	99.3377	0.662252	0		56.2992	36.2205	7.08661		86.2205	8.66142	0		86.9565	7.82609	0.434783
		Exp 2	98.494	1.50602	0		56.3025	35.2941	6.30252		87.1212	8.71212	0		83.8565	12.1076	0
		Exp 3	99.6825	0.31746	0		60.5932	32.6271	5.08475		87.9518	8.03213	0		84.322	11.8644	0
		Mean	99.1714	0.828579	0		57.7317	34.7139	6.15796		87.0978	8.46856	0		85.045	10.5994	0.144928
		S.D.	0.61149	0.61149	0		2.47819	1.86562	1.00873		0.865904	0.378806	0		1.67169	2.40481	0.251022
