# Supplementary material for: Centrosome amplification and aneuploidy driven by the HIV-1-induced Vpr•VprBP•Plk4 complex in CD4+ T cells
Source: Research Square preprint supplement (doi:10.21203/rs.3.rs-2924123/v1), 2023-08-22
Supplement: Supplementary file 2 [file e9bc18ed96582a304ffdb1bf.xlsx]

## Sheet: Sup. Table 4_Mass spec
	Experiment 1					Experiment 2
	Protein	Accession	Vector	Plk4 (581-884)		Protein	Accession	Vector	Plk4 (581–970)
	Uncharacterized protein C9orf174 OS=Homo sapiens GN=C9orf174 PE=1 SV=2	Q9P1Z9	490	486		Kinesin-like protein KIF11	P52732	1300	835
	Actin, aortic smooth muscle OS=Homo sapiens GN=ACTA2 PE=1 SV=1	P62736	172	317		Thyroid hormone receptor-associated protein 3	Q9Y2W1	1219	705
	Plectin OS=Homo sapiens GN=PLEC PE=1 SV=3	Q15149	173	233		Eukaryotic translation initiation factor 4B	P23588	598	618
	Ig kappa chain C region OS=Homo sapiens GN=IGKC PE=1 SV=1	P01834	174	151		Protein arginine N-methyltransferase 5	O14744	756	618
	Ig gamma-1 chain C region OS=Homo sapiens GN=IGHG1 PE=1 SV=1	P01857	187	140		Heat shock cognate 71 kDa protein	P11142	178	600
	Alpha-actinin-1 OS=Homo sapiens GN=ACTN1 PE=1 SV=2	P12814	48	138		RNA binding motif protein 10, isoform CRA_d	A0A0A0MR66	739	582
	Protein VPRBP OS=Homo sapiens GN=VPRBP PE=1 SV=3	Q9Y4B6		138		Keratin, type I cytoskeletal 10	P13645	599	561
	Filamin-A OS=Homo sapiens GN=FLNA PE=1 SV=4	P21333	125	130		DNA-dependent protein kinase catalytic subunit	P78527	257	467
	Spectrin alpha chain, non-erythrocytic 1 OS=Homo sapiens GN=SPTAN1 PE=1 SV=3	Q13813	46	130		Heat shock 70 kDa protein 1B	P0DMV9	194	432
	Heterogeneous nuclear ribonucleoprotein M OS=Homo sapiens GN=HNRNPM PE=1 SV=3	P52272	75	109		Serine/threonine-protein kinase PLK4	J3KR82	24	365
	Actin, cytoplasmic 1 OS=Homo sapiens GN=ACTB PE=1 SV=1	P60709	37	105		Nucleolin	P19338	176	321
	DNA damage-binding protein 1 OS=Homo sapiens GN=DDB1 PE=1 SV=1 (DDB1)	Q16531	4	104		Bcl-2-associated transcription factor 1	Q9NYF8	653	293
	Drebrin OS=Homo sapiens GN=DBN1 PE=1 SV=4	Q16643	40	100		Heterogeneous nuclear ribonucleoprotein M	A0A087X0X3	92	284
	Terminal uridylyltransferase 4 OS=Homo sapiens GN=ZCCHC11 PE=1 SV=3	Q5TAX3	100	100		Protein IGKV2D-29	A0A087X0P6	302	284
	Spectrin beta chain, non-erythrocytic 1 OS=Homo sapiens GN=SPTBN1 PE=1 SV=2	Q01082	44	94		Bcl-2-associated transcription factor 1	E9PK91	588	261
	Serine/threonine-protein kinase PLK4 OS=Homo sapiens GN=PLK4 PE=1 SV=3	O00444		89		Heterogeneous nuclear ribonucleoproteins A2/B1	P22626	203	258
	Myosin-9 OS=Homo sapiens GN=MYH9 PE=1 SV=4	P35579	112	83		HIV Tat-specific factor 1	O43719	5	257
	Tropomyosin alpha-1 chain OS=Homo sapiens GN=TPM1 PE=1 SV=2	P09493	33	76		U5 small nuclear ribonucleoprotein 200 kDa helicase	O75643	311	235
	Filamin-C OS=Homo sapiens GN=FLNC PE=1 SV=3	Q14315	88	75		Centrosomal protein of 152 kDa	O94986		233
	Histone H1.2 OS=Homo sapiens GN=HIST1H1C PE=1 SV=2	P16403	66	74		Nucleoprotein TPR	P12270	3	219
	Filamin-B OS=Homo sapiens GN=FLNB PE=1 SV=2	O75369	53	74		Pre-mRNA-processing-splicing factor 8	Q6P2Q9	298	215
	Cytospin-A OS=Homo sapiens GN=SPECC1L PE=1 SV=2	Q69YQ0	19	71		Probable ATP-dependent RNA helicase DDX17	Q92841	131	198
	Annexin A2 OS=Homo sapiens GN=ANXA2 PE=1 SV=2	P07355	33	66		Splicing factor, proline- and glutamine-rich	P23246	230	196
	Caldesmon OS=Homo sapiens GN=CALD1 PE=1 SV=3	Q05682	15	64		Splicing factor 3B subunit 1	O75533	162	192
	Ig lambda-2 chain C regions OS=Homo sapiens GN=IGLC2 PE=1 SV=1	P0CG05	77	64		ATP-dependent RNA helicase A	Q08211	139	190
	Coronin-1C OS=Homo sapiens GN=CORO1C PE=1 SV=1	Q9ULV4	9	61		Heterogeneous nuclear ribonucleoprotein M (Fragment)	M0QZM1	55	180
	Nucleolin OS=Homo sapiens GN=NCL PE=1 SV=3	P19338	48	61		78 kDa glucose-regulated protein	P11021	83	174
	Putative beta-actin-like protein 3 OS=Homo sapiens GN=POTEKP PE=5 SV=1	Q9BYX7	25	59		Cytoplasmic dynein 1 heavy chain 1	Q14204	95	173
	78 kDa glucose-regulated protein OS=Homo sapiens GN=HSPA5 PE=1 SV=2	P11021	69	57		Filamin-A	P21333	208	170
	Vimentin OS=Homo sapiens GN=VIM PE=1 SV=4	P08670	24	56		Protein VPRBP	Q9Y4B6	1	160
	Alpha-actinin-4 OS=Homo sapiens GN=ACTN4 PE=1 SV=2	O43707	15	55		Heterogeneous nuclear ribonucleoprotein R	O43390	90	160
	Heat shock cognate 71 kDa protein OS=Homo sapiens GN=HSPA8 PE=1 SV=1	P11142	40	53		Heterogeneous nuclear ribonucleoprotein K	P61978	117	144
	Dedicator of cytokinesis protein 10 OS=Homo sapiens GN=DOCK10 PE=1 SV=3	Q96BY6	30	49		Heterogeneous nuclear ribonucleoprotein U	Q00839	94	142
	Immunoglobulin lambda-like polypeptide 5 OS=Homo sapiens GN=IGLL5 PE=2 SV=2	B9A064	63	45		Heterogeneous nuclear ribonucleoprotein Q	O60506	71	139
	Zyxin OS=Homo sapiens GN=ZYX PE=1 SV=1	Q15942	42	45		Poly [ADP-ribose] polymerase 1	P09874	64	138
	Stress-70 protein, mitochondrial OS=Homo sapiens GN=HSPA9 PE=1 SV=2	P38646	57	44		Heterogeneous nuclear ribonucleoproteins C1/C2	G3V2Q1	82	136
	Clathrin heavy chain 1 OS=Homo sapiens GN=CLTC PE=1 SV=5	Q00610	39	43		Heterogeneous nuclear ribonucleoproteins C1/C2	B2R5W2	80	134
	Uncharacterized protein OS=Homo sapiens PE=4 SV=1	C9JWB5	52	43		ATP-dependent RNA helicase DDX3X	A0A0D9SFB3	140	133
	60 kDa heat shock protein, mitochondrial OS=Homo sapiens GN=HSPD1 PE=1 SV=2	P10809	32	41		Heterogeneous nuclear ribonucleoprotein A3	P51991	106	131
	Neuroblast differentiation-associated protein AHNAK OS=Homo sapiens GN=AHNAK PE=1 SV=2	Q09666	34	41		Matrin-3	P43243	57	131
	Prelamin-A/C OS=Homo sapiens GN=LMNA PE=1 SV=1	P02545	38	40		Probable ATP-dependent RNA helicase DDX5	J3KTA4	92	122
	LIM domain and actin-binding protein 1 OS=Homo sapiens GN=LIMA1 PE=1 SV=1	Q9UHB6	13	38		Splicing factor 3B subunit 3	Q15393	109	122
	Transferrin receptor protein 1 OS=Homo sapiens GN=TFRC PE=1 SV=2	P02786	51	38		Methylosome subunit pICln	P54105	76	121
	Protein Wnt-3a OS=Homo sapiens GN=WNT3A PE=1 SV=2	P56704	25	37		Polyadenylate-binding protein	A0A087WTT1	158	121
	Elongation factor 1-alpha 1 OS=Homo sapiens GN=EEF1A1 PE=1 SV=1	P68104	25	35		DNA damage-binding protein 1 (DDB1)	Q16531		117
	Ig gamma-2 chain C region OS=Homo sapiens GN=IGHG2 PE=1 SV=2	P01859	29	32		Heterogeneous nuclear ribonucleoprotein Q	B7Z645	61	113
	Myosin regulatory light chain 12A OS=Homo sapiens GN=MYL12A PE=1 SV=2	P19105	18	32		Interleukin enhancer-binding factor 3	Q12906	112	110
	Reticulocalbin-1 OS=Homo sapiens GN=RCN1 PE=1 SV=1	Q15293	25	32		Myb-binding protein 1A	Q9BQG0	40	109
	Heterogeneous nuclear ribonucleoprotein K OS=Homo sapiens GN=HNRNPK PE=1 SV=1	P61978	21	31		Spectrin alpha chain, non-erythrocytic 1	A0A0D9SF54	177	108
	Zinc finger protein 292 OS=Homo sapiens GN=ZNF292 PE=1 SV=3	O60281	36	31		Splicing factor 3B subunit 2	A0A087WZZ5	98	108
	Splicing factor, proline- and glutamine-rich OS=Homo sapiens GN=SFPQ PE=1 SV=2	P23246	15	30		Myosin-10	P35580	105	103
	Lupus La protein OS=Homo sapiens GN=SSB PE=1 SV=2	P05455	21	29		Nucleophosmin	P06748	127	103
	DNA replication licensing factor MCM3 OS=Homo sapiens GN=MCM3 PE=1 SV=3	P25205	11	28		60S ribosomal protein L6	Q02878	47	100
	Tropomyosin alpha-4 chain OS=Homo sapiens GN=TPM4 PE=1 SV=3	P67936	10	28		60 kDa heat shock protein, mitochondrial	P10809	31	96
	Cadherin-24 OS=Homo sapiens GN=CDH24 PE=1 SV=1	Q86UP0	24	26		T-complex protein 1 subunit zeta	P40227	48	95
	Elongation factor Tu, mitochondrial OS=Homo sapiens GN=TUFM PE=1 SV=2	P49411	27	26		T-complex protein 1 subunit theta	P50990	27	95
	Cytoskeleton-associated protein 4 OS=Homo sapiens GN=CKAP4 PE=1 SV=2	Q07065	15	26		Myosin-9	P35579	97	93
	Heterogeneous nuclear ribonucleoprotein L OS=Homo sapiens GN=HNRNPL PE=1 SV=2	P14866	16	26		Heterogeneous nuclear ribonucleoprotein A1	P09651	66	91
	Trypsin-1 OS=Homo sapiens GN=PRSS1 PE=1 SV=1	P07477	35	26		E3 ubiquitin-protein ligase HUWE1	Q7Z6Z7	6	90
	Putative uncharacterized protein FLJ46214 OS=Homo sapiens PE=2 SV=1	Q6ZRN7	18	26		Protein RRP5 homolog	Q14690	27	88
	Mitogen-activated protein kinase-binding protein 1 OS=Homo sapiens GN=MAPKBP1 PE=2 SV=4	O60336	24	25		Serine/threonine-protein kinase RIO1	Q9BRS2	122	87
	Desmoplakin OS=Homo sapiens GN=DSP PE=1 SV=3	P15924	6	25		60S acidic ribosomal protein P0	P05388	43	86
	Serpin H1 OS=Homo sapiens GN=SERPINH1 PE=1 SV=2	P50454	32	25		116 kDa U5 small nuclear ribonucleoprotein component	Q15029	106	85
	Titin OS=Homo sapiens GN=TTN PE=1 SV=4	Q8WZ42	22	25		60S ribosomal protein L5	P46777	16	85
	Tropomyosin alpha-1 chain OS=Homo sapiens GN=TPM1 PE=2 SV=1	B7Z596	10	25		Pre-mRNA-splicing factor ATP-dependent RNA helicase DHX15	O43143	121	84
	Cofilin-1 OS=Homo sapiens GN=CFL1 PE=1 SV=3	P23528	6	24		Nucleolar RNA helicase 2	Q9NR30	51	84
	Zinc finger protein 185 OS=Homo sapiens GN=ZNF185 PE=1 SV=3	O15231	7	24		Nucleobindin-1	Q02818		83
	Protocadherin-17 OS=Homo sapiens GN=PCDH17 PE=2 SV=2	O14917	31	24		Midasin	Q9NU22	14	80
	Trifunctional enzyme subunit alpha, mitochondrial OS=Homo sapiens GN=HADHA PE=1 SV=2	P40939	19	24		Chromodomain-helicase-DNA-binding protein 4	F5GWX5	32	80
	Tropomyosin beta chain OS=Homo sapiens GN=TPM2 PE=1 SV=1	P07951	7	24		Serine/arginine repetitive matrix protein 2	Q9UQ35	63	79
	Coronin-1B OS=Homo sapiens GN=CORO1B PE=1 SV=1	Q9BR76	3	23		ATP-dependent RNA helicase DDX18	Q9NVP1	20	77
	Calmodulin OS=Homo sapiens GN=CALM1 PE=1 SV=2	P62158	7	22		T-complex protein 1 subunit alpha	P17987	33	76
	Hornerin OS=Homo sapiens GN=HRNR PE=1 SV=2	Q86YZ3	49	22		Insulin-like growth factor 2 mRNA-binding protein 1	Q9NZI8	40	73
	Actin-binding LIM protein 1 OS=Homo sapiens GN=ABLIM1 PE=1 SV=3	O14639	14	22		Spectrin beta chain, non-erythrocytic 1	Q01082	135	72
	40S ribosomal protein S3 OS=Homo sapiens GN=RPS3 PE=1 SV=2	P23396	13	22		Mitogen-activated protein kinase kinase kinase 7	O43318	58	71
	Matrin-3 OS=Homo sapiens GN=MATR3 PE=1 SV=2	P43243	20	21		MAX gene-associated protein	Q8IWI9	59	71
	Heterogeneous nuclear ribonucleoproteins A2/B1 OS=Homo sapiens GN=HNRNPA2B1 PE=1 SV=2	P22626	12	21		Putative ATP-dependent RNA helicase DHX30	H7BXY3	27	70
	ATP-dependent RNA helicase A OS=Homo sapiens GN=DHX9 PE=1 SV=4	Q08211	24	21		RNA-binding protein EWS	B0QYK0	50	69
	Nucleobindin-1 OS=Homo sapiens GN=NUCB1 PE=1 SV=4	Q02818	1	21		T-complex protein 1 subunit epsilon	P48643	40	69
	T-complex protein 1 subunit theta OS=Homo sapiens GN=CCT8 PE=1 SV=4	P50990	11	21		RNA-binding protein FUS	P35637	56	69
	Outer row dynein assembly protein 16 homolog OS=Homo sapiens GN=WDR69 PE=1 SV=1	Q8N136	16	21		Coiled-coil domain-containing protein 180	Q9P1Z9	71	68
	Heterogeneous nuclear ribonucleoprotein F OS=Homo sapiens GN=HNRNPF PE=1 SV=3	P52597	17	20		X-ray repair cross-complementing protein 6	P12956	50	68
	Histone H1.0 OS=Homo sapiens GN=H1F0 PE=1 SV=3	P07305	13	20		TGF-beta-activated kinase 1 and MAP3K7-binding protein 1	Q15750	79	67
	Trypsin-2 OS=Homo sapiens GN=PRSS2 PE=1 SV=1	P07478	24	20		X-ray repair cross-complementing protein 5	P13010	41	65
	Protein CYR61 OS=Homo sapiens GN=CYR61 PE=1 SV=1	O00622	16	20		Nucleolar protein 56	O00567	26	64
	Dehydrogenase/reductase SDR family member 2 OS=Homo sapiens GN=DHRS2 PE=1 SV=3	Q13268	12	19		Pericentrin	O95613	1	64
	AP-2 complex subunit alpha-1 OS=Homo sapiens GN=AP2A1 PE=1 SV=3	O95782	7	19		Polyadenylate-binding protein	B1ANR0	76	63
	Heat shock 70 kDa protein 1-like OS=Homo sapiens GN=HSPA1L PE=1 SV=2	P34931	11	19		Heterogeneous nuclear ribonucleoprotein C-like 1	O60812		63
	Transcription elongation factor B polypeptide 1 OS=Homo sapiens GN=TCEB1 PE=1 SV=1	Q15369	29	19		Probable 28S rRNA (cytosine(4447)-C(5))-methyltransferase	P46087	20	60
	X-ray repair cross-complementing protein 6 OS=Homo sapiens GN=XRCC6 PE=1 SV=2	P12956	25	19		T-complex protein 1 subunit gamma	B4DUR8		59
	Nucleophosmin OS=Homo sapiens GN=NPM1 PE=1 SV=2	P06748	10	19		Serine/arginine-rich splicing factor 1	Q07955	66	58
	Heat shock-related 70 kDa protein 2 OS=Homo sapiens GN=HSPA2 PE=1 SV=1	P54652	12	18		Polyubiquitin-C (Fragment)	F5H265	13	58
	Lactotransferrin OS=Homo sapiens GN=LTF PE=1 SV=6	P02788	22	18		Heterogeneous nuclear ribonucleoprotein A/B	D6R9P3	34	57
	Heat shock 70 kDa protein 1A/1B OS=Homo sapiens GN=HSPA1A PE=1 SV=5	P08107	12	18		Histone H1.2	P16403	21	57
	Non-POU domain-containing octamer-binding protein OS=Homo sapiens GN=NONO PE=1 SV=4	Q15233	4	18		Heat shock protein HSP 90-beta	P08238	43	56
	Nuclease-sensitive element-binding protein 1 OS=Homo sapiens GN=YBX1 PE=1 SV=3	P67809	13	18		Nucleolar protein 14	P78316	41	56
	DNA-dependent protein kinase catalytic subunit OS=Homo sapiens GN=PRKDC PE=1 SV=3	P78527	15	17		Transformer-2 protein homolog beta	P62995	73	56
	Junction plakoglobin OS=Homo sapiens GN=JUP PE=1 SV=3	P14923	10	17		DBIRD complex subunit ZNF326	Q5BKZ1	42	52
	Heat shock 70 kDa protein 4 OS=Homo sapiens GN=HSPA4 PE=1 SV=4	P34932	10	17		rRNA 2'-O-methyltransferase fibrillarin	P22087	60	51
	Dermcidin OS=Homo sapiens GN=DCD PE=1 SV=2	P81605	18	17		Treacle protein	Q13428		50
	Phostensin OS=Homo sapiens GN=PPP1R18 PE=1 SV=1	Q6NYC8	3	17		Proline-, glutamic acid- and leucine-rich protein 1	Q8IZL8		50
	Succinate dehydrogenase [ubiquinone] flavoprotein subunit, mitochondrial OS=Homo sapiens GN=SDHA PE=1 SV=2	P31040	15	17		Stress-70 protein, mitochondrial	P38646	44	50
	Teneurin-3 OS=Homo sapiens GN=TENM3 PE=2 SV=3	Q9P273	26	17		CAD protein	F8VPD4	15	50
	Sodium channel protein type 10 subunit alpha OS=Homo sapiens GN=SCN10A PE=1 SV=2	Q9Y5Y9	22	17		Microtubule-associated protein 1B	P46821	64	50
	Transitional endoplasmic reticulum ATPase OS=Homo sapiens GN=VCP PE=1 SV=4	P55072	15	17		Importin-7	O95373	2	49
	Lamin-B1 OS=Homo sapiens GN=LMNB1 PE=1 SV=2	P20700	16	16		N-acetyltransferase 10	Q9H0A0	29	48
	Calumenin OS=Homo sapiens GN=CALU PE=1 SV=2	O43852	19	16		Spermatid perinuclear RNA-binding protein	Q96SI9	38	48
	Histone H1.1 OS=Homo sapiens GN=HIST1H1A PE=1 SV=3	Q02539	17	16		Transcription initiation factor TFIID subunit 4	O00268	52	48
	Heterogeneous nuclear ribonucleoprotein U OS=Homo sapiens GN=HNRNPU PE=1 SV=6	Q00839	22	16		Putative RNA-binding protein 15	A0A087WWP4	84	47
	ATP-dependent RNA helicase DDX3X OS=Homo sapiens GN=DDX3X PE=1 SV=3	O00571	9	16		Serine/threonine-protein kinase PRP4 homolog	Q13523	58	46
	GPI inositol-deacylase OS=Homo sapiens GN=PGAP1 PE=2 SV=1	Q75T13	13	16		U4/U6.U5 tri-snRNP-associated protein 1	O43290	70	46
	IQ motif and SEC7 domain-containing protein 1 OS=Homo sapiens GN=IQSEC1 PE=1 SV=1	Q6DN90	23	16		Serine/arginine-rich splicing factor 4	Q08170	72	46
	ATP-binding cassette sub-family D member 1 OS=Homo sapiens GN=ABCD1 PE=1 SV=2	P33897	8	16		Clathrin heavy chain 1	Q00610	27	45
	Gelsolin OS=Homo sapiens GN=GSN PE=1 SV=1	P06396	7	16		Ribosome biogenesis protein BMS1 homolog	Q14692	27	45
	Vesicle-associated membrane protein-associated protein A OS=Homo sapiens GN=VAPA PE=1 SV=3	Q9P0L0	4	16		DNA topoisomerase 2-alpha	P11388	12	43
	Poly [ADP-ribose] polymerase 1 OS=Homo sapiens GN=PARP1 PE=1 SV=4	P09874	15	16		Cell division cycle 5-like protein	Q99459	56	43
	60S ribosomal protein L5 OS=Homo sapiens GN=RPL5 PE=1 SV=3	P46777	6	15		Heterogeneous nuclear ribonucleoprotein A0	Q13151	26	43
	Ankyrin repeat and SOCS box protein 18 OS=Homo sapiens GN=ASB18 PE=2 SV=2	Q6ZVZ8	15	15		Staphylococcal nuclease domain-containing protein 1	Q7KZF4	44	42
	Leucine-rich PPR motif-containing protein, mitochondrial OS=Homo sapiens GN=LRPPRC PE=1 SV=3	P42704	18	15		Eukaryotic translation initiation factor 3 subunit A	Q14152	47	42
	DnaJ homolog subfamily B member 11 OS=Homo sapiens GN=DNAJB11 PE=1 SV=1	Q9UBS4	18	15		Probable ATP-dependent RNA helicase DDX23	Q9BUQ8	67	41
	Pyruvate kinase isozymes M1/M2 OS=Homo sapiens GN=PKM PE=1 SV=4	P14618	10	15		HEAT repeat-containing protein 1	Q9H583		41
	Protein disulfide-isomerase OS=Homo sapiens GN=P4HB PE=1 SV=3	P07237	4	15		RNA-binding protein 14	Q96PK6	40	41
	Kinectin OS=Homo sapiens GN=KTN1 PE=1 SV=1	Q86UP2	17	14		E3 SUMO-protein ligase RanBP2	P49792	14	40
	Histone-lysine N-methyltransferase ASH1L OS=Homo sapiens GN=ASH1L PE=1 SV=2	Q9NR48	20	14		Nucleolar protein 58	Q9Y2X3	23	40
	Ig kappa chain V-III region SIE OS=Homo sapiens PE=1 SV=1	P01620	17	14		Ras GTPase-activating-like protein IQGAP1	P46940	32	39
	Lysine-specific demethylase 6B OS=Homo sapiens GN=KDM6B PE=1 SV=4	O15054	8	14		Protein SON	P18583	27	39
	40S ribosomal protein S18 OS=Homo sapiens GN=RPS18 PE=1 SV=3	P62269	15	14		Testis-expressed sequence 10 protein	Q9NXF1	8	39
	F-actin-capping protein subunit beta OS=Homo sapiens GN=CAPZB PE=1 SV=4	P47756	8	14		U4/U6 small nuclear ribonucleoprotein Prp31	Q8WWY3	45	39
	Protein THEMIS OS=Homo sapiens GN=THEMIS PE=1 SV=3	Q8N1K5	15	14		SCY1-like protein 2	Q6P3W7	52	39
	Proline-rich protein 19 OS=Homo sapiens GN=PRR19 PE=2 SV=1	A6NJB7	13	14		Zinc finger CCCH domain-containing protein 13	Q5T200	51	39
	WD repeat-containing protein 1 OS=Homo sapiens GN=WDR1 PE=1 SV=4	O75083	2	14		Serine/arginine-rich splicing factor 5	Q13243	42	39
	Uncharacterized protein KIAA1211 OS=Homo sapiens GN=KIAA1211 PE=1 SV=3	Q6ZU35	3	14		FACT complex subunit SPT16	Q9Y5B9	24	39
	Sp110 nuclear body protein OS=Homo sapiens GN=SP110 PE=1 SV=5	Q9HB58	14	14		La-related protein 1	Q6PKG0	67	38
	Transcription termination factor, mitochondrial OS=Homo sapiens GN=MTERF PE=1 SV=1	Q99551	10	14		Pre-mRNA-splicing factor ATP-dependent RNA helicase PRP16	Q92620	44	38
	Probable 2-oxoglutarate dehydrogenase E1 component DHKTD1, mitochondrial OS=Homo sapiens GN=DHTKD1 PE=2 SV=2	Q96HY7	9	14		Coiled-coil domain-containing protein 47	Q96A33	1	38
	Elongation factor 2 OS=Homo sapiens GN=EEF2 PE=1 SV=4	P13639	8	13		U2 snRNP-associated SURP motif-containing protein	O15042	30	38
	60S ribosomal protein L4 OS=Homo sapiens GN=RPL4 PE=1 SV=5	P36578	6	13		ATP-dependent RNA helicase DDX1	Q92499	38	37
	C-1-tetrahydrofolate synthase, cytoplasmic OS=Homo sapiens GN=MTHFD1 PE=1 SV=3	P11586	16	13		ATPase family AAA domain-containing protein 3A (Fragment)	H0Y2W2	26	37
	Activating signal cointegrator 1 complex subunit 2 OS=Homo sapiens GN=ASCC2 PE=1 SV=3	Q9H1I8	14	13		Probable ATP-dependent RNA helicase DDX10	Q13206	11	37
	Filaggrin-2 OS=Homo sapiens GN=FLG2 PE=1 SV=1	Q5D862	10	13		60S ribosomal protein L7a	P62424	24	37
	Dihydrolipoyllysine-residue succinyltransferase component of 2-oxoglutarate dehydrogenase complex, mitochondrial OS=Homo sapiens GN=DLST PE=1 SV=4	P36957	13	13		DNA replication licensing factor MCM7	P33993	15	37
	Ig heavy chain V-III region VH26 OS=Homo sapiens PE=1 SV=1	P01764	18	13		Transcription factor E2F7	Q96AV8	39	36
	Tumor protein D53 OS=Homo sapiens GN=TPD52L1 PE=1 SV=1	Q16890	2	13		Serine/threonine-protein phosphatase 6 regulatory subunit 3	H7BXH2		36
	T-complex protein 1 subunit epsilon OS=Homo sapiens GN=CCT5 PE=1 SV=1	P48643	7	13		Glutaminyl-peptide cyclotransferase-like protein	Q9NXS2	13	36
	Treacle protein OS=Homo sapiens GN=TCOF1 PE=1 SV=3	Q13428	11	13		Superkiller viralicidic activity 2-like 2	P42285	13	36
	Trypsin-3 OS=Homo sapiens GN=PRSS3 PE=1 SV=2	P35030	15	13		Telomere-associated protein RIF1	Q5UIP0	37	36
	Uncharacterized protein C14orf93 OS=Homo sapiens GN=C14orf93 PE=2 SV=1	Q9H972	13	13		Protein virilizer homolog	Q69YN4	23	35
	Pyruvate carboxylase, mitochondrial OS=Homo sapiens GN=PC PE=1 SV=2	P11498	21	13		Heat shock protein HSP 90-alpha	P07900	32	35
	Heat shock protein 105 kDa OS=Homo sapiens GN=HSPH1 PE=1 SV=1	Q92598	5	12		Centrosome-associated protein 350	Q5VT06	23	34
	E3 SUMO-protein ligase RanBP2 OS=Homo sapiens GN=RANBP2 PE=1 SV=2	P49792	7	12		Protein SET	A0A0C4DFV9	3	34
	Mitochondrial inner membrane protein OS=Homo sapiens GN=IMMT PE=1 SV=1	Q16891	13	12		Transformer-2 protein homolog alpha	Q13595	89	33
	Myosin-10 OS=Homo sapiens GN=MYH10 PE=1 SV=3	P35580	17	12		Serrate RNA effector molecule homolog	Q9BXP5	13	33
	Heterogeneous nuclear ribonucleoprotein Q OS=Homo sapiens GN=SYNCRIP PE=1 SV=2	O60506	10	12		Fatty acid synthase	P49327	9	33
	Four and a half LIM domains protein 2 OS=Homo sapiens GN=FHL2 PE=1 SV=3	Q14192	13	12		Apoptotic chromatin condensation inducer in the nucleus	S4R3H4	143	33
	FCH domain only protein 2 OS=Homo sapiens GN=FCHO2 PE=4 SV=1	H7BXJ4	13	12		Elongation factor 2	P13639	19	32
	ADP-ribosylation factor 1 OS=Homo sapiens GN=ARF1 PE=1 SV=2	P84077	10	12		28S ribosomal protein S22, mitochondrial	G5E9W7	11	32
	ATP-dependent RNA helicase DDX1 OS=Homo sapiens GN=DDX1 PE=1 SV=2	Q92499	15	12		60S ribosomal protein L4	P36578	21	32
	Ig kappa chain V-II region Cum OS=Homo sapiens PE=1 SV=1	P01614	20	12		Serine/arginine-rich-splicing factor 7	A0A0B4J1Z1	44	32
	ATPase family AAA domain-containing protein 3A OS=Homo sapiens GN=ATAD3A PE=1 SV=2	Q9NVI7	15	12		Heterogeneous nuclear ribonucleoprotein D-like	A0A087WUK2	22	31
	Alpha-enolase OS=Homo sapiens GN=ENO1 PE=1 SV=2	P06733	6	12		Structural maintenance of chromosomes flexible hinge domain-containing protein 1	A6NHR9	34	31
	Peroxiredoxin-1 OS=Homo sapiens GN=PRDX1 PE=1 SV=1	Q06830	7	12		Developmentally-regulated GTP-binding protein 1	Q9Y295	5	31
	Pyruvate dehydrogenase E1 component subunit alpha, somatic form, mitochondrial OS=Homo sapiens GN=PDHA1 PE=1 SV=3	P08559	21	12		Casein kinase II subunit alpha	E7EU96	28	31
	Unconventional myosin-XVIIIa OS=Homo sapiens GN=MYO18A PE=1 SV=3	Q92614	2	12		ATPase family AAA domain-containing protein 3B	Q5T9A4	23	31
	Unconventional myosin-Ic OS=Homo sapiens GN=MYO1C PE=1 SV=4	O00159	12	12		Nuclear cap-binding protein subunit 1	Q09161	31	30
	Probable helicase with zinc finger domain OS=Homo sapiens GN=HELZ PE=1 SV=2	P42694	7	12		Anaphase-promoting complex subunit 1	Q9H1A4		30
	Nestin OS=Homo sapiens GN=NES PE=1 SV=2	P48681	1	12		Heterogeneous nuclear ribonucleoprotein U-like protein 2	Q1KMD3	21	30
	UDP-glucose:glycoprotein glucosyltransferase 1 OS=Homo sapiens GN=UGGT1 PE=1 SV=3	Q9NYU2	23	12		Importin-8	O15397	28	29
	X-ray repair cross-complementing protein 5 OS=Homo sapiens GN=XRCC5 PE=1 SV=3	P13010	8	12		Ribosomal biogenesis protein LAS1L	Q9Y4W2	4	29
	Protein-glutamine gamma-glutamyltransferase 4 OS=Homo sapiens GN=TGM4 PE=1 SV=2	P49221	11	12		SWI/SNF-related matrix-associated actin-dependent regulator of chromatin subfamily A member 5	O60264	9	29
	Beta-actin-like protein 2 OS=Homo sapiens GN=ACTBL2 PE=1 SV=2	Q562R1	1	11		Eukaryotic translation initiation factor 2 subunit 1	P05198	28	29
	Heterogeneous nuclear ribonucleoprotein D0 OS=Homo sapiens GN=HNRNPD PE=1 SV=1	Q14103	5	11		Complement component 1 Q subcomponent-binding protein, mitochondrial	Q07021	30	29
	NACHT, LRR and PYD domains-containing protein 5 OS=Homo sapiens GN=NLRP5 PE=2 SV=2	P59047	4	11		RNA polymerase II-associated factor 1 homolog	Q8N7H5	5	29
	Catenin alpha-1 OS=Homo sapiens GN=CTNNA1 PE=1 SV=1	P35221	5	11		Protein LYRIC	Q86UE4	18	28
	Heterogeneous nuclear ribonucleoprotein A1-like 2 OS=Homo sapiens GN=HNRNPA1L2 PE=2 SV=2	Q32P51	9	11		Ras GTPase-activating protein-binding protein 1	Q13283	15	28
	Myotubularin-related protein 4 OS=Homo sapiens GN=MTMR4 PE=2 SV=2	Q9NYA4	6	11		MAX gene-associated protein (Fragment)	H3BU53	27	28
	60S ribosomal protein L13 OS=Homo sapiens GN=RPL13 PE=1 SV=4	P26373	16	11		Far upstream element-binding protein 2	A0A087WTP3	26	28
	Apoptosis-inducing factor 1, mitochondrial OS=Homo sapiens GN=AIFM1 PE=1 SV=1	O95831	9	11		NF-kappa-B-repressing factor	O15226	14	28
	Tropomyosin alpha-3 chain OS=Homo sapiens GN=TPM3 PE=1 SV=1	P06753	4	11		ATP-dependent RNA helicase DDX50	Q9BQ39	22	27
	RNA-binding protein FUS OS=Homo sapiens GN=FUS PE=1 SV=1	P35637	6	11		Elongation factor 1-delta	E9PRY8	30	27
	rRNA 2'-O-methyltransferase fibrillarin OS=Homo sapiens GN=FBL PE=1 SV=2	P22087	3	11		Exosome component 10	Q01780	12	27
	Protein phosphatase 1 regulatory subunit 12A OS=Homo sapiens GN=PPP1R12A PE=1 SV=1	O14974	5	11		Protein KRI1 homolog	Q8N9T8	5	27
	Oxysterol-binding protein-related protein 3 OS=Homo sapiens GN=OSBPL3 PE=1 SV=1	Q9H4L5	1	11		Probable rRNA-processing protein EBP2	Q99848	6	27
	Nuclear pore complex protein Nup93 OS=Homo sapiens GN=NUP93 PE=1 SV=2	Q8N1F7	12	11		Clathrin interactor 1	Q14677	1	27
	DnaJ homolog subfamily A member 2 OS=Homo sapiens GN=DNAJA2 PE=1 SV=1	O60884	4	10		Microtubule-associated protein 4	P27816	21	27
	Heterogeneous nuclear ribonucleoprotein H OS=Homo sapiens GN=HNRNPH1 PE=1 SV=4	P31943	10	10		E3 ubiquitin-protein ligase UBR5	E7EMW7	4	26
	ADP/ATP translocase 1 OS=Homo sapiens GN=SLC25A4 PE=1 SV=4	P12235	9	10		Serine/arginine-rich-splicing factor 10	Q5JRI1	40	26
	Dynein heavy chain domain-containing protein 1 OS=Homo sapiens GN=DNHD1 PE=1 SV=2	Q96M86	7	10		Ubiquitin carboxyl-terminal hydrolase 7	Q93009	9	26
	Desmin OS=Homo sapiens GN=DES PE=1 SV=3	P17661	6	10		Ribosome biogenesis protein BOP1	Q14137	10	26
	DNA replication licensing factor MCM2 OS=Homo sapiens GN=MCM2 PE=1 SV=4	P49736	8	10		Core histone macro-H2A.1	O75367	7	26
	MORC family CW-type zinc finger protein 2 OS=Homo sapiens GN=MORC2 PE=1 SV=2	Q9Y6X9	6	10		DNA replication licensing factor MCM3	P25205	39	26
	Caprin-1 OS=Homo sapiens GN=CAPRIN1 PE=1 SV=2	Q14444	9	10		RNA-binding protein 28	Q9NW13	10	26
	Collagen alpha-1(IV) chain OS=Homo sapiens GN=COL4A1 PE=1 SV=3	P02462	9	10		Protein crumbs homolog 1	A0A075B6G4	22	25
	DNA replication licensing factor MCM5 OS=Homo sapiens GN=MCM5 PE=1 SV=5	P33992	7	10		Heterogeneous nuclear ribonucleoprotein H3	P31942	23	25
	Endoplasmin OS=Homo sapiens GN=HSP90B1 PE=1 SV=1	P14625	11	10		ATP-dependent RNA helicase DDX54	Q8TDD1	5	25
	45 kDa calcium-binding protein OS=Homo sapiens GN=SDF4 PE=1 SV=1	Q9BRK5	10	10		Rho-associated protein kinase 1	Q13464	30	25
	40S ribosomal protein S3a OS=Homo sapiens GN=RPS3A PE=1 SV=2	P61247	13	10		RNA-binding protein 5	P52756	35	25
	Trifunctional enzyme subunit beta, mitochondrial OS=Homo sapiens GN=HADHB PE=1 SV=3	P55084	7	10		DNA mismatch repair protein Msh6	P52701	4	25
	Nuclear distribution protein nudE homolog 1 OS=Homo sapiens GN=NDE1 PE=1 SV=2	Q9NXR1		10		Kanadaptin	A0A087X0M4	7	25
	T-complex protein 1 subunit eta OS=Homo sapiens GN=CCT7 PE=1 SV=2	Q99832	9	10		Sentrin-specific protease 3	Q9H4L4	2	25
	Polyadenylate-binding protein 1 OS=Homo sapiens GN=PABPC1 PE=1 SV=2	P11940	9	10		Heat shock 70 kDa protein 4	P34932	4	24
	Probable ATP-dependent RNA helicase DHX36 OS=Homo sapiens GN=DHX36 PE=1 SV=2	Q9H2U1	4	10		SRSF protein kinase 1	Q96SB4	16	24
	Protein disulfide-isomerase A6 OS=Homo sapiens GN=PDIA6 PE=1 SV=1	Q15084	12	10		5'-3' exoribonuclease 2	Q9H0D6	17	24
	T-complex protein 1 subunit delta OS=Homo sapiens GN=CCT4 PE=1 SV=4	P50991	4	10		Nucleolar complex protein 3 homolog	Q8WTT2	9	24
	Neutral alpha-glucosidase AB OS=Homo sapiens GN=GANAB PE=1 SV=3	Q14697	9	10		FACT complex subunit SSRP1	Q08945	19	24
	Protein AF-17 OS=Homo sapiens GN=MLLT6 PE=1 SV=2	P55198	6	10		Heat shock protein 105 kDa	Q92598		24
	YTH domain family protein 1 OS=Homo sapiens GN=YTHDF1 PE=1 SV=1	Q9BYJ9	6	10		Rabankyrin-5	Q9P2R3	18	24
	Probable ATP-dependent DNA helicase HFM1 OS=Homo sapiens GN=HFM1 PE=1 SV=2	A2PYH4	7	10		RNA-binding protein 25	P49756	41	24
	Pre-mRNA-processing factor 6 OS=Homo sapiens GN=PRPF6 PE=1 SV=1	O94906	6	10		General transcription factor II-I	P78347	7	24
	Stomatin-like protein 2 OS=Homo sapiens GN=STOML2 PE=1 SV=1	Q9UJZ1	5	10		Translational activator GCN1	Q92616	7	23
	Suprabasin OS=Homo sapiens GN=SBSN PE=4 SV=1	E9PBV3	13	10		Heterogeneous nuclear ribonucleoprotein L (Fragment)	M0QXS5	19	23
	Hexokinase-1 OS=Homo sapiens GN=HK1 PE=1 SV=3	P19367	10	9		Cytoskeleton-associated protein 4	Q07065	8	23
	Cullin-9 OS=Homo sapiens GN=CUL9 PE=1 SV=2	Q8IWT3	1	9		CCAAT/enhancer-binding protein zeta	Q03701		23
	Bifunctional glutamate/proline--tRNA ligase OS=Homo sapiens GN=EPRS PE=1 SV=5	P07814	18	9		U1 small nuclear ribonucleoprotein 70 kDa	P08621	32	23
	Ataxin-1 OS=Homo sapiens GN=ATXN1 PE=1 SV=2	P54253	5	9		Squamous cell carcinoma antigen recognized by T-cells 3	Q15020		23
	Guanine nucleotide-binding protein G(I)/G(S)/G(T) subunit beta-1 OS=Homo sapiens GN=GNB1 PE=1 SV=3	P62873	2	9		pre-rRNA processing protein FTSJ3	Q8IY81	1	23
	Heat shock protein 75 kDa, mitochondrial OS=Homo sapiens GN=TRAP1 PE=1 SV=3	Q12931	7	9		Histone H4	P62805	26	23
	Major facilitator superfamily domain-containing protein 9 OS=Homo sapiens GN=MFSD9 PE=4 SV=1	F8WE00	10	9		Importin subunit beta-1	Q14974	14	23
	Ankycorbin OS=Homo sapiens GN=RAI14 PE=1 SV=2	Q9P0K7	3	9		Cell division cycle and apoptosis regulator protein 1	Q8IX12	28	23
	Far upstream element-binding protein 2 OS=Homo sapiens GN=KHSRP PE=1 SV=4	Q92945	11	9		Mediator of DNA damage checkpoint protein 1	Q14676	10	22
	Ig lambda chain V-I region HA OS=Homo sapiens PE=1 SV=1	P01700	9	9		Lamin-B1	P20700		22
	Actin-related protein 2 OS=Homo sapiens GN=ACTR2 PE=1 SV=1	P61160	4	9		Apoptosis-inducing factor 1, mitochondrial	O95831	10	22
	LIM domain only protein 7 OS=Homo sapiens GN=LMO7 PE=1 SV=3	Q8WWI1	1	9		Transcription initiation factor TFIID subunit 1	P21675		22
	Glial fibrillary acidic protein OS=Homo sapiens GN=GFAP PE=1 SV=1	P14136	2	9		YLP motif-containing protein 1	P49750	21	22
	Dystonin OS=Homo sapiens GN=DST PE=1 SV=4	Q03001	7	9		Bifunctional glutamate/proline--tRNA ligase	P07814	19	22
	ADP/ATP translocase 2 OS=Homo sapiens GN=SLC25A5 PE=1 SV=7	P05141	8	9		Plectin	Q15149	27	22
	Calcium-binding protein 1 OS=Homo sapiens GN=CABP1 PE=1 SV=5	Q9NZU7	3	9		Nucleolar pre-ribosomal-associated protein 1	O60287	9	22
	DNA replication licensing factor MCM7 OS=Homo sapiens GN=MCM7 PE=1 SV=4	P33993	13	9		Antigen KI-67	A0A087WV66	10	22
	Emerin OS=Homo sapiens GN=EMD PE=1 SV=1	P50402	10	9		General transcription factor 3C polypeptide 1	Q12789	16	22
	4F2 cell-surface antigen heavy chain OS=Homo sapiens GN=SLC3A2 PE=1 SV=3	P08195	14	9		Fragile X mental retardation protein 1	A8MQB8		22
	Probable ATP-dependent RNA helicase DDX5 OS=Homo sapiens GN=DDX5 PE=1 SV=1	P17844	4	9		DNA-directed RNA polymerase	A0A0C4DGZ0	12	22
	Probable ATP-dependent RNA helicase DDX17 OS=Homo sapiens GN=DDX17 PE=1 SV=2	Q92841	15	9		Cleavage and polyadenylation specificity factor subunit 2	Q9P2I0	15	22
	Prohibitin-2 OS=Homo sapiens GN=PHB2 PE=1 SV=2	Q99623	10	9		Nuclear mitotic apparatus protein 1	A0A087WY61	16	21
	Sperm-associated antigen 17 OS=Homo sapiens GN=SPAG17 PE=1 SV=1	Q6Q759	2	9		Ribosomal RNA processing protein 1 homolog B	Q14684	7	21
	Poly(rC)-binding protein 1 OS=Homo sapiens GN=PCBP1 PE=1 SV=2	Q15365	9	9		Protein IWS1 homolog	Q96ST2	1	21
	Signal-induced proliferation-associated protein 1 OS=Homo sapiens GN=SIPA1 PE=1 SV=1	Q96FS4	2	9		Guanine nucleotide-binding protein-like 3	Q9BVP2	8	21
	Serine/arginine repetitive matrix protein 1 OS=Homo sapiens GN=SRRM1 PE=1 SV=2	Q8IYB3	8	9		Pre-mRNA 3'-end-processing factor FIP1	Q6UN15	18	21
	Neurabin-2 OS=Homo sapiens GN=PPP1R9B PE=1 SV=2	Q96SB3	2	9		Pre-mRNA-processing factor 6	O94906	65	21
	Xylosyltransferase 1 OS=Homo sapiens GN=XYLT1 PE=1 SV=1	Q86Y38	4	9		TGF-beta-activated kinase 1 and MAP3K7-binding protein 2	Q9NYJ8	16	21
	Serine/threonine-protein phosphatase PP1-alpha catalytic subunit OS=Homo sapiens GN=PPP1CA PE=1 SV=1	P62136	2	9		Mitochondrial ribonuclease P protein 1	Q7L0Y3	7	21
	Rhomboid domain-containing protein 2 OS=Homo sapiens GN=RHBDD2 PE=2 SV=2	Q6NTF9	4	9		Probable ATP-dependent RNA helicase DDX27	B7Z6D5	10	21
	T-complex protein 1 subunit alpha OS=Homo sapiens GN=TCP1 PE=1 SV=1	P17987	3	9		Calcium homeostasis endoplasmic reticulum protein	Q8IWX8	30	21
	T-complex protein 1 subunit gamma OS=Homo sapiens GN=CCT3 PE=1 SV=4	P49368	8	9		Eukaryotic translation initiation factor 3 subunit H	O15372		20
	Thioredoxin OS=Homo sapiens GN=TXN PE=1 SV=3	P10599	5	9		Trinucleotide repeat-containing gene 6B protein (Fragment)	H0Y720	13	20
	UHRF1-binding protein 1-like OS=Homo sapiens GN=UHRF1BP1L PE=1 SV=2	A0JNW5	5	9		TATA-binding protein-associated factor 2N	A0A075B7D9	23	20
	Twinfilin-1 OS=Homo sapiens GN=TWF1 PE=1 SV=3	Q12792	3	9		Centrosomal protein of 192 kDa	A0A0A0MR42		30
	Pyruvate dehydrogenase E1 component subunit alpha, testis-specific form, mitochondrial OS=Homo sapiens GN=PDHA2 PE=1 SV=1	P29803	10	9		Fragile X mental retardation protein 1	Q06787	10	20
	Putative heat shock protein HSP 90-beta-3 OS=Homo sapiens GN=HSP90AB3P PE=5 SV=1	Q58FF7	8	9		Tyrosine-protein kinase JAK1	P23458	16	19
	Nucleobindin-2 OS=Homo sapiens GN=NUCB2 PE=1 SV=2	P80303	2	9		Serine/threonine-protein phosphatase PP1-beta catalytic subunit	P62140	12	19
	60S acidic ribosomal protein P0-like OS=Homo sapiens GN=RPLP0P6 PE=5 SV=1	Q8NHW5	6	8		Girdin	Q3V6T2	16	19
	DNA replication licensing factor MCM6 OS=Homo sapiens GN=MCM6 PE=1 SV=1	Q14566	6	8		Caprin-1	G3V153	22	19
	60S ribosomal protein L26-like 1 OS=Homo sapiens GN=RPL26L1 PE=1 SV=1	Q9UNX3	7	8		Serine/threonine-protein phosphatase	F8VYE8	8	19
	Interleukin enhancer-binding factor 2 OS=Homo sapiens GN=ILF2 PE=1 SV=2	Q12905	3	8		DNA replication licensing factor MCM5	P33992	19	19
	Microtubule-actin cross-linking factor 1, isoforms 1/2/3/5 OS=Homo sapiens GN=MACF1 PE=1 SV=4	Q9UPN3	5	8		Pinin	Q9H307	33	19
	Actin-related protein 2/3 complex subunit 2 OS=Homo sapiens GN=ARPC2 PE=1 SV=1	O15144	3	8		Cleavage and polyadenylation specificity factor subunit 1	Q10570	34	19
	DBIRD complex subunit KIAA1967 OS=Homo sapiens GN=KIAA1967 PE=1 SV=2	Q8N163	15	8		Zinc finger protein 638	Q14966	15	19
	High mobility group protein B1 OS=Homo sapiens GN=HMGB1 PE=1 SV=3	P09429	7	8		OTU domain-containing protein 4	Q01804	9	18
	Collagen alpha-2(I) chain OS=Homo sapiens GN=COL1A2 PE=1 SV=7	P08123	3	8		Ras GTPase-activating protein-binding protein 2	Q9UN86	4	18
	Collagen alpha-1(VII) chain OS=Homo sapiens GN=COL7A1 PE=1 SV=2	Q02388	8	8		U5 small nuclear ribonucleoprotein 40 kDa protein	Q96DI7	23	18
	Collagen alpha-1(XXII) chain OS=Homo sapiens GN=COL22A1 PE=1 SV=2	Q8NFW1	1	8		Structural maintenance of chromosomes protein 2	O95347	16	18
	26S proteasome non-ATPase regulatory subunit 2 OS=Homo sapiens GN=PSMD2 PE=1 SV=3	Q13200	6	8		Splicing factor 3A subunit 1	Q15459	9	18
	Monofunctional C1-tetrahydrofolate synthase, mitochondrial OS=Homo sapiens GN=MTHFD1L PE=1 SV=1	Q6UB35	11	8		Calmodulin-regulated spectrin-associated protein 3	Q9P1Y5	19	18
	Bifunctional methylenetetrahydrofolate dehydrogenase/cyclohydrolase, mitochondrial OS=Homo sapiens GN=MTHFD2 PE=1 SV=2	P13995	13	8		U3 small nucleolar ribonucleoprotein protein MPP10	O00566	7	18
	Myelin transcription factor 1-like protein OS=Homo sapiens GN=MYT1L PE=2 SV=3	Q9UL68	3	8		Protein AATF	Q9NY61	5	18
	Ig gamma-3 chain C region OS=Homo sapiens GN=IGHG3 PE=1 SV=2	P01860	11	8		Serine/threonine-protein phosphatase PP1-alpha catalytic subunit	P62136	8	18
	Ig kappa chain V-IV region (Fragment) OS=Homo sapiens GN=IGKV4-1 PE=4 SV=1	P06312	9	8		Protein transport protein Sec16A	O15027	6	18
	Epiplakin OS=Homo sapiens GN=EPPK1 PE=1 SV=2	P58107	6	8		TGF-beta-activated kinase 1 and MAP3K7-binding protein 3	Q8N5C8	8	18
	60S ribosomal protein L7 OS=Homo sapiens GN=RPL7 PE=1 SV=1	P18124	4	8		MKI67 FHA domain-interacting nucleolar phosphoprotein	Q9BYG3	1	18
	5'-3' exoribonuclease 2 OS=Homo sapiens GN=XRN2 PE=1 SV=1	Q9H0D6	3	8		Filamin-B	O75369	20	18
	Desmoglein-1 OS=Homo sapiens GN=DSG1 PE=1 SV=2	Q02413	1	8		Cytoskeleton-associated protein 5	Q14008	15	18
	Homeobox protein goosecoid-2 OS=Homo sapiens GN=GSC2 PE=2 SV=1	O15499	5	8		Eukaryotic translation initiation factor 3 subunit B	P55884	15	18
	Mitochondrial import inner membrane translocase subunit TIM50 OS=Homo sapiens GN=TIMM50 PE=1 SV=2	Q3ZCQ8	9	8		Eukaryotic translation initiation factor 3 subunit C	Q99613	12	18
	Apolipoprotein L2 OS=Homo sapiens GN=APOL2 PE=1 SV=1	Q9BQE5	3	8		Zinc finger CCCH-type antiviral protein 1	Q7Z2W4	3	18
	Sorcin OS=Homo sapiens GN=SRI PE=1 SV=1	P30626	8	8		DNA topoisomerase 2 (Fragment)	E9PCY5	3	18
	Nuclear mitotic apparatus protein 1 OS=Homo sapiens GN=NUMA1 PE=1 SV=2	Q14980	8	8		Insulin-like growth factor 2 mRNA-binding protein 3	O00425	13	18
	Ubiquitin carboxyl-terminal hydrolase 40 OS=Homo sapiens GN=USP40 PE=2 SV=3	Q9NVE5	5	8		Zinc finger protein 768	H3BS42	10	17
	Solute carrier family 22 member 20 OS=Homo sapiens GN=SLC22A20 PE=2 SV=1	A6NK97	5	8		Nucleolar GTP-binding protein 1	Q9BZE4	3	17
	Unconventional myosin-XIX OS=Homo sapiens GN=MYO19 PE=2 SV=2	Q96H55	2	8		Isoleucine--tRNA ligase, cytoplasmic	J3KR24	20	17
	Proline-rich protein 15 OS=Homo sapiens GN=PRR15 PE=2 SV=1	Q8IV56	4	8		Histone H1x	Q92522	7	17
	Prohibitin OS=Homo sapiens GN=PHB PE=1 SV=1	P35232	14	8		Filamin-C	Q14315		17
	Stromal cell-derived factor 2-like protein 1 OS=Homo sapiens GN=SDF2L1 PE=1 SV=2	Q9HCN8	10	8		Casein kinase II subunit alpha'	P19784	34	17
	StAR-related lipid transfer protein 9 OS=Homo sapiens GN=STARD9 PE=1 SV=3	Q9P2P6	2	8		Eukaryotic translation initiation factor 3 subunit D	O15371	13	17
	Tetratricopeptide repeat protein 40 OS=Homo sapiens GN=TTC40 PE=2 SV=3	Q8IYW2	4	8		U3 small nucleolar RNA-associated protein 14 homolog A	Q9BVJ6	7	17
	Protein FAM71F1 OS=Homo sapiens GN=FAM71F1 PE=2 SV=1	Q96KD3	7	8		Centrosomal protein of 63 kDa	Q96MT8		17
	Poly(U)-binding-splicing factor PUF60 OS=Homo sapiens GN=PUF60 PE=1 SV=1	Q9UHX1	5	8		Protein phosphatase 1B	O75688	28	17
	Tropomyosin 3 OS=Homo sapiens GN=TPM3 PE=2 SV=1	Q5VU61	9	8		ATP-binding cassette sub-family F member 1	Q8NE71	17	17
	Nucleolar RNA helicase 2 OS=Homo sapiens GN=DDX21 PE=1 SV=5	Q9NR30	3	8		Fragile X mental retardation syndrome-related protein 1	B4DXZ6		17
	Recombining binding protein suppressor of hairless-like protein OS=Homo sapiens GN=RBPJL PE=1 SV=3	Q9UBG7	12	8		Deoxynucleotidyltransferase terminal-interacting protein 2	Q5QJE6	4	17
	F-actin-capping protein subunit alpha-1 OS=Homo sapiens GN=CAPZA1 PE=1 SV=3	P52907	3	7		Ig gamma-2 chain C region	P01859	21	17
	60S ribosomal protein L12 OS=Homo sapiens GN=RPL12 PE=1 SV=1	P30050	4	7		Transcriptional repressor p66-beta	Q8WXI9	12	17
	Heat shock protein HSP 90-beta OS=Homo sapiens GN=HSP90AB1 PE=1 SV=4	P08238	9	7		Protein polybromo-1	Q86U86	14	17
	Kinesin-like protein KIF3C OS=Homo sapiens GN=KIF3C PE=1 SV=3	O14782	4	7		Claspin	Q9HAW4		17
	60S ribosomal protein L11 OS=Homo sapiens GN=RPL11 PE=1 SV=2	P62913	3	7		Anaphase-promoting complex subunit 5	F5H0F9		16
	Heterogeneous nuclear ribonucleoprotein U-like protein 1 OS=Homo sapiens GN=HNRNPUL1 PE=1 SV=2	Q9BUJ2	7	7		Heterogeneous nuclear ribonucleoprotein D0 (Fragment)	H0YA96	7	16
	L-lactate dehydrogenase A chain OS=Homo sapiens GN=LDHA PE=1 SV=2	P00338	7	7		Tropomodulin-3	Q9NYL9	16	16
	Collagen alpha-1(XIX) chain OS=Homo sapiens GN=COL19A1 PE=1 SV=3	Q14993	1	7		Histone deacetylase 1	Q13547	9	16
	Dynamin-like 120 kDa protein, mitochondrial OS=Homo sapiens GN=OPA1 PE=1 SV=3	O60313	5	7		RNA-binding protein Raly (Fragment)	Q5QPL9		16
	60S ribosomal protein L17 OS=Homo sapiens GN=RPL17 PE=1 SV=3	P18621	5	7		Myosin-14	Q7Z406	13	16
	Bile acid receptor OS=Homo sapiens GN=NR1H4 PE=1 SV=2	Q96RI1	3	7		F-actin-capping protein subunit alpha-1	P52907	22	16
	Cofilin-2 OS=Homo sapiens GN=CFL2 PE=1 SV=1	Q9Y281		7		Cyclin-dependent kinase 13	Q14004	7	16
	Catenin beta-1 OS=Homo sapiens GN=CTNNB1 PE=1 SV=1	P35222	4	7		Nucleolar protein 11	Q9H8H0	6	16
	Flotillin-2 OS=Homo sapiens GN=FLOT2 PE=1 SV=2	Q14254	3	7		Mitochondrial import inner membrane translocase subunit TIM50	Q3ZCQ8	5	16
	Mediator of RNA polymerase II transcription subunit 8 OS=Homo sapiens GN=MED8 PE=1 SV=2	Q96G25	11	7		WD repeat-containing protein 3	Q9UNX4	12	16
	40S ribosomal protein S6 OS=Homo sapiens GN=RPS6 PE=1 SV=1	P62753	6	7		Transcription activator BRG1	P51532	7	16
	Midline-1 OS=Homo sapiens GN=MID1 PE=1 SV=1	O15344	4	7		Serine-threonine kinase receptor-associated protein	Q9Y3F4	7	16
	E3 ubiquitin-protein ligase PDZRN3 OS=Homo sapiens GN=PDZRN3 PE=1 SV=2	Q9UPQ7	4	7		Nuclear pore complex protein Nup153	P49790	1	16
	40S ribosomal protein S5 OS=Homo sapiens GN=RPS5 PE=1 SV=4	P46782	2	7		Cullin-associated NEDD8-dissociated protein 1	Q86VP6	6	16
	Catenin delta-1 OS=Homo sapiens GN=CTNND1 PE=1 SV=1	O60716	8	7		Ribosomal L1 domain-containing protein 1 (Fragment)	J3QSV6		16
	Caveolin-1 OS=Homo sapiens GN=CAV1 PE=1 SV=4	Q03135	2	7		Elongation factor 1-delta	E9PN91		16
	Isoleucine--tRNA ligase, cytoplasmic OS=Homo sapiens GN=IARS PE=1 SV=2	P41252	8	7		RNA-binding protein 6	P78332	15	15
	CAD protein OS=Homo sapiens GN=CAD PE=1 SV=3	P27708	5	7		Nucleolar protein 6	Q9H6R4	13	15
	Chromodomain-helicase-DNA-binding protein 8 (Fragment) OS=Homo sapiens GN=CHD8 PE=4 SV=1	G3V303	7	7		Small subunit processome component 20 homolog	O75691	13	15
	Dynein heavy chain 5, axonemal OS=Homo sapiens GN=DNAH5 PE=1 SV=3	Q8TE73	2	7		DNA replication licensing factor MCM2 (Fragment)	H0Y8E6		15
	Leucine-rich repeat-containing protein C10orf11 OS=Homo sapiens GN=C10orf11 PE=1 SV=1	Q9H2I8	9	7		WD repeat-containing protein 36	A0A0A0MTB8	8	15
	Peroxisomal proliferator-activated receptor A-interacting complex 285 kDa protein OS=Homo sapiens GN=PRIC285 PE=1 SV=6	Q9BYK8	1	7		Leucine--tRNA ligase, cytoplasmic	Q9P2J5	6	15
	Uncharacterized protein KIAA1109 OS=Homo sapiens GN=KIAA1109 PE=1 SV=2	Q2LD37	2	7		Anaphase-promoting complex subunit 4	Q9UJX5		15
	Peroxisome assembly protein 12 OS=Homo sapiens GN=PEX12 PE=1 SV=1	O00623	5	7		Zinc finger CCCH domain-containing protein 18	Q86VM9	1	15
	Protein furry homolog-like OS=Homo sapiens GN=FRYL PE=1 SV=2	O94915	2	7		NK-tumor recognition protein	P30414	12	15
	Peptidyl-prolyl cis-trans isomerase B OS=Homo sapiens GN=PPIB PE=1 SV=2	P23284	2	7		Transcription intermediary factor 1-beta	Q13263		15
	WD repeat-containing protein 81 OS=Homo sapiens GN=WDR81 PE=1 SV=2	Q562E7	9	7		Non-POU domain-containing octamer-binding protein	Q15233	35	15
	Polymerase delta-interacting protein 2 OS=Homo sapiens GN=POLDIP2 PE=1 SV=1	Q9Y2S7	3	7		28S ribosomal protein S9, mitochondrial	P82933	6	15
	Protein RCC2 OS=Homo sapiens GN=RCC2 PE=1 SV=2	Q9P258		7		ATP-dependent RNA helicase DDX51	Q8N8A6	3	15
	Protein AHNAK2 OS=Homo sapiens GN=AHNAK2 PE=1 SV=2	Q8IVF2	2	7		28S ribosomal protein S29, mitochondrial	P51398	4	15
	Putative insulin-like growth factor 2 antisense gene protein OS=Homo sapiens GN=IGF2-AS PE=2 SV=2	Q6U949	6	7		DNA repair protein RAD50	Q92878	5	14
	TBC1 domain family member 30 OS=Homo sapiens GN=TBC1D30 PE=1 SV=2	Q9Y2I9	4	7		UDP-glucose:glycoprotein glucosyltransferase 1	Q9NYU2	19	14
	Protein-L-isoaspartate(D-aspartate) O-methyltransferase OS=Homo sapiens GN=PCMT1 PE=1 SV=4	P22061	6	7		Coordinator of PRMT5 and differentiation stimulator	Q9NQ92		14
	Reticulocalbin-3 OS=Homo sapiens GN=RCN3 PE=1 SV=1	Q96D15	8	7		U4/U6 small nuclear ribonucleoprotein Prp3	O43395	25	14
	Protein-glutamine gamma-glutamyltransferase E OS=Homo sapiens GN=TGM3 PE=1 SV=4	Q08188	4	7		Putative oxidoreductase GLYR1	Q49A26	14	14
	Transcription factor jun-B OS=Homo sapiens GN=JUNB PE=1 SV=1	P17275	12	7		Pyrroline-5-carboxylate reductase 2	Q96C36	11	14
	Tight junction protein ZO-1 OS=Homo sapiens GN=TJP1 PE=1 SV=3	Q07157	4	7		Structural maintenance of chromosomes protein 1A	Q14683	10	14
	Signal-induced proliferation-associated 1-like protein 1 OS=Homo sapiens GN=SIPA1L1 PE=1 SV=4	O43166	1	7		RNA-binding protein 39	G3XAC6		14
	Septin-7 OS=Homo sapiens GN=SEPT7 PE=1 SV=2	Q16181	11	7		ATP-dependent RNA helicase DDX24	G3V529	5	14
	Serum albumin OS=Homo sapiens GN=ALB PE=1 SV=2	P02768	14	7		Nucleolar complex protein 2 homolog	Q9Y3T9	2	14
	Synaptonemal complex protein 2-like OS=Homo sapiens GN=SYCP2L PE=2 SV=1	B4DFB8	3	7		60S ribosomal protein L35	P42766		14
	Transcription intermediary factor 1-beta OS=Homo sapiens GN=TRIM28 PE=1 SV=5	Q13263	4	7		Structural maintenance of chromosomes protein 3	Q9UQE7	8	14
	Eukaryotic translation initiation factor 3 subunit B OS=Homo sapiens GN=EIF3B PE=1 SV=3	P55884	6	6		Pescadillo homolog	B5MCF9	3	14
	Bromodomain adjacent to zinc finger domain protein 1A OS=Homo sapiens GN=BAZ1A PE=1 SV=2	Q9NRL2	3	6		Trypsin-3 (Fragment)	B1AN99	12	14
	2-oxoglutarate dehydrogenase, mitochondrial OS=Homo sapiens GN=OGDH PE=1 SV=3	Q02218	5	6		SURP and G-patch domain-containing protein 2	Q8IX01		14
	Microtubule-associated serine/threonine-protein kinase 4 OS=Homo sapiens GN=MAST4 PE=1 SV=3	O15021	2	6		Chromodomain-helicase-DNA-binding protein 3	Q12873	7	14
	Armadillo repeat-containing protein 6 (Fragment) OS=Homo sapiens GN=ARMC6 PE=4 SV=1	F5H6J3	6	6		Transcriptional repressor p66-alpha	Q86YP4	11	14
	Fibrous sheath-interacting protein 2 OS=Homo sapiens GN=FSIP2 PE=1 SV=4	Q5CZC0	1	6		60S ribosomal protein L24	C9JXB8	12	14
	40S ribosomal protein S13 OS=Homo sapiens GN=RPS13 PE=1 SV=2	P62277	3	6		Something about silencing protein 10	Q9NQZ2	4	14
	Eukaryotic translation initiation factor 3 subunit H OS=Homo sapiens GN=EIF3H PE=1 SV=1	O15372	5	6		Cell division cycle protein 16 homolog	Q13042		14
	Arginine--tRNA ligase, cytoplasmic OS=Homo sapiens GN=RARS PE=1 SV=2	P54136	8	6		Cell division cycle 27, isoform CRA_c	G5EA36		14
	DnaJ homolog subfamily B member 1 OS=Homo sapiens GN=DNAJB1 PE=1 SV=4	P25685	3	6		Cell cycle and apoptosis regulator protein 2	Q8N163		14
	Actin-related protein 3 OS=Homo sapiens GN=ACTR3 PE=1 SV=3	P61158	1	6		Exportin-2	P55060	9	13
	Flotillin-1 OS=Homo sapiens GN=FLOT1 PE=1 SV=3	O75955	2	6		Nuclear RNA export factor 1 (Fragment)	E9PIN3	11	13
	Centrosomal protein of 152 kDa OS=Homo sapiens GN=CEP152 PE=1 SV=3	O94986	5	6		Histone H2B type 1-K	O60814		13
	Axin-1 OS=Homo sapiens GN=AXIN1 PE=1 SV=2	O15169	4	6		Polynucleotide 5'-hydroxyl-kinase NOL9	Q5SY16	3	13
	MICAL-like protein 2 OS=Homo sapiens GN=MICALL2 PE=1 SV=1	Q8IY33	3	6		Digestive organ expansion factor homolog	Q68CQ4	2	13
	Host cell factor 1 OS=Homo sapiens GN=HCFC1 PE=1 SV=2	P51610	4	6		SWI/SNF complex subunit SMARCC1	Q92922	9	13
	ATP synthase subunit b, mitochondrial OS=Homo sapiens GN=ATP5F1 PE=1 SV=2	P24539	4	6		Transducin beta-like protein 3	Q12788	9	13
	Coiled-coil domain-containing protein 106 OS=Homo sapiens GN=CCDC106 PE=1 SV=1	Q9BWC9	14	6		Probable global transcription activator SNF2L1	P28370	3	13
	DNA mismatch repair protein Msh2 OS=Homo sapiens GN=MSH2 PE=1 SV=1	P43246	2	6		Probable RNA-binding protein 19	Q9Y4C8	6	13
	Eukaryotic translation initiation factor 2 subunit 1 OS=Homo sapiens GN=EIF2S1 PE=1 SV=3	P05198	3	6		RRP12-like protein	Q5JTH9	7	13
	Conserved oligomeric Golgi complex subunit 6 OS=Homo sapiens GN=COG6 PE=1 SV=2	Q9Y2V7	2	6		Zinc finger RNA-binding protein	Q96KR1	5	13
	Caldesmon OS=Homo sapiens GN=CALD1 PE=4 SV=1	F5H1Z9	2	6		Fragile X mental retardation syndrome-related protein 2	P51116	6	13
	GDP dissociation inhibitor 2 (Fragment) OS=Homo sapiens GN=GDI2 PE=2 SV=1	Q5SX86	3	6		RANBP2-like and GRIP domain-containing protein 1	P0DJD0		13
	2-oxoglutarate and iron-dependent oxygenase domain-containing protein 1 OS=Homo sapiens GN=OGFOD1 PE=1 SV=1	Q8N543	8	6		RNA-binding protein 4	Q9BWF3	6	12
	Fatty acid synthase OS=Homo sapiens GN=FASN PE=1 SV=3	P49327	8	6		Heterogeneous nuclear ribonucleoprotein U-like protein 1	Q9BUJ2	12	12
	60S ribosomal protein L31 OS=Homo sapiens GN=RPL31 PE=1 SV=1	P62899	2	6		Mannosyl-oligosaccharide glucosidase	Q13724	17	12
	60S ribosomal protein L8 OS=Homo sapiens GN=RPL8 PE=1 SV=2	P62917	5	6		Cell division cycle protein 23 homolog	Q9UJX2	1	12
	Glutamine--tRNA ligase OS=Homo sapiens GN=QARS PE=1 SV=1	P47897	14	6		Neuroguidin	Q8NEJ9	13	12
	Kinetochore protein Nuf2 OS=Homo sapiens GN=NUF2 PE=1 SV=2	Q9BZD4	2	6		Histone H2B type 1-J	P06899	10	12
	Ig kappa chain V-III region VG (Fragment) OS=Homo sapiens PE=1 SV=1	P04433	11	6		Nuclear pore complex protein Nup205	Q92621	2	12
	Multiple C2 and transmembrane domain-containing protein 2 OS=Homo sapiens GN=MCTP2 PE=1 SV=3	Q6DN12	8	6		Nuclear valosin-containing protein-like	O15381	3	12
	Complement factor B OS=Homo sapiens GN=CFB PE=1 SV=2	P00751	8	6		Gem-associated protein 4	I3L2C7	11	12
	Heterogeneous nuclear ribonucleoprotein R OS=Homo sapiens GN=HNRNPR PE=1 SV=1	O43390	3	6		ATP-dependent RNA helicase DHX36 (Fragment)	E7EWK3		12
	Heterogeneous nuclear ribonucleoprotein A1 OS=Homo sapiens GN=HNRNPA1 PE=1 SV=5	P09651	4	6		Ribosomal RNA-processing protein 7 homolog A	Q9Y3A4	12	12
	28S ribosomal protein S5, mitochondrial OS=Homo sapiens GN=MRPS5 PE=1 SV=2	P82675	3	6		Peptidyl-prolyl cis-trans isomerase-like 4	Q8WUA2	11	12
	Ig heavy chain V-III region BRO OS=Homo sapiens PE=1 SV=1	P01766	6	6		KH domain-containing, RNA-binding, signal transduction-associated protein 1	Q07666	23	12
	Lamin-B2 OS=Homo sapiens GN=LMNB2 PE=1 SV=3	Q03252	8	6		Proline-, glutamic acid- and leucine-rich protein 1 (Fragment)	I3L1P4	1	12
	Importin subunit beta-1 OS=Homo sapiens GN=KPNB1 PE=1 SV=2	Q14974	6	6		Protein furry homolog-like	O94915		12
	ATP-dependent Clp protease ATP-binding subunit clpX-like, mitochondrial OS=Homo sapiens GN=CLPX PE=1 SV=2	O76031	2	6		Annexin A2	P07355	8	12
	Nebulin OS=Homo sapiens GN=NEB PE=1 SV=4	P20929	11	6		Protein PRRC2C	E7EPN9	7	12
	Cysteine and glycine-rich protein 2 OS=Homo sapiens GN=CSRP2 PE=1 SV=3	Q16527	5	6		RB1-inducible coiled-coil protein 1	Q8TDY2	14	12
	Ig lambda chain V-III region LOI OS=Homo sapiens PE=1 SV=1	P80748	7	6		Histone deacetylase 2	Q92769	13	12
	Elongation factor 1-delta OS=Homo sapiens GN=EEF1D PE=1 SV=5	P29692	8	6		THO complex subunit 5 homolog	Q13769	9	12
	Peroxisomal multifunctional enzyme type 2 OS=Homo sapiens GN=HSD17B4 PE=1 SV=3	P51659	7	6		40S ribosomal protein S3	P23396		12
	RNA-binding motif protein, X chromosome OS=Homo sapiens GN=RBMX PE=1 SV=3	P38159	3	6		Thyroid transcription factor 1-associated protein 26	Q9P031	5	12
	Tubulin beta-2A chain OS=Homo sapiens GN=TUBB2A PE=1 SV=1	Q13885	8	6		40S ribosomal protein S8	Q5JR95	26	12
	Spectrin beta chain, erythrocytic OS=Homo sapiens GN=SPTB PE=1 SV=5	P11277	5	6		U3 small nucleolar ribonucleoprotein protein IMP4 (Fragment)	E7ENR5	4	12
	Neuromodulin OS=Homo sapiens GN=GAP43 PE=1 SV=1	P17677	4	6		Tubulin beta-4B chain	P68371		12
	Unconventional myosin-XVIIIb OS=Homo sapiens GN=MYO18B PE=1 SV=1	Q8IUG5	5	6		Protein FAM208A	Q9UK61	4	11
	R3H domain-containing protein 2 OS=Homo sapiens GN=R3HDM2 PE=1 SV=3	Q9Y2K5	1	6		Protein Red	Q13123	12	11
	Serine/arginine repetitive matrix protein 2 OS=Homo sapiens GN=SRRM2 PE=1 SV=2	Q9UQ35	2	6		E3 ubiquitin-protein ligase UBR4	Q5T4S7		11
	Transcriptional repressor scratch 2 OS=Homo sapiens GN=SCRT2 PE=2 SV=3	Q9NQ03		6		RNA 3'-terminal phosphate cyclase-like protein	Q9Y2P8	4	11
	PDZ and LIM domain protein 4 OS=Homo sapiens GN=PDLIM4 PE=1 SV=2	P50479	3	6		Metastasis-associated protein MTA1	E7ESY4	5	11
	Protein KRT17P1 OS=Homo sapiens GN=KRT17P1 PE=3 SV=1	A8MW45	9	6		Oxysterol-binding protein-related protein 3	Q9H4L5		11
	Pre-mRNA-processing factor 40 homolog A OS=Homo sapiens GN=PRPF40A PE=1 SV=2	O75400	1	6		Ribosome biogenesis protein BRX1 homolog	Q8TDN6	1	11
	Splicing factor U2AF 35 kDa subunit OS=Homo sapiens GN=U2AF1 PE=1 SV=3	Q01081	3	6		Tyrosine-protein kinase BAZ1B	Q9UIG0	2	11
	Tropomyosin 1 (Alpha) isoform 7 OS=Homo sapiens GN=TPM1 PE=3 SV=1	D9YZV8	2	6		Eukaryotic translation initiation factor 3 subunit I	Q13347	10	11
	WD repeat-containing protein 87 OS=Homo sapiens GN=WDR87 PE=2 SV=3	Q6ZQQ6	4	6		TRMT1-like protein	Q7Z2T5	4	11
	Protein VAC14 homolog OS=Homo sapiens GN=VAC14 PE=1 SV=1	Q08AM6	3	6		Uncharacterized protein C12orf43	Q96C57		11
	DNA replication licensing factor MCM4 OS=Homo sapiens GN=MCM4 PE=1 SV=5	P33991	2	5		Eukaryotic translation initiation factor 4 gamma 1	E7EX73	7	11
	Lipoamide acyltransferase component of branched-chain alpha-keto acid dehydrogenase complex, mitochondrial OS=Homo sapiens GN=DBT PE=1 SV=3	P11182	3	5		MICOS complex subunit MIC60 (Fragment)	H7C463	8	11
	Ig mu chain C region OS=Homo sapiens GN=IGHM PE=1 SV=3	P01871	7	5		Dedicator of cytokinesis protein 7	Q96N67	13	11
	26S proteasome non-ATPase regulatory subunit 1 OS=Homo sapiens GN=PSMD1 PE=1 SV=2	Q99460	4	5		Putative bifunctional UDP-N-acetylglucosamine transferase and deubiquitinase ALG13	Q9NP73	24	11
	ATP synthase subunit O, mitochondrial OS=Homo sapiens GN=ATP5O PE=1 SV=1	P48047	5	5		Leucine-rich PPR motif-containing protein, mitochondrial	P42704	10	11
	Dedicator of cytokinesis protein 7 OS=Homo sapiens GN=DOCK7 PE=1 SV=4	Q96N67	2	5		Double-strand break repair protein MRE11A	F8W7U8	2	11
	Caspase-1 OS=Homo sapiens GN=CASP1 PE=1 SV=1	P29466	6	5		DnaJ homolog subfamily A member 3, mitochondrial	Q96EY1	4	11
	Homeobox protein SIX5 (Fragment) OS=Homo sapiens GN=SIX5 PE=4 SV=1	H0YLF6	2	5		Splicing factor, arginine/serine-rich 19	Q9H7N4	8	11
	Myosin regulatory light polypeptide 9 OS=Homo sapiens GN=MYL9 PE=1 SV=4	P24844		5		Sarcoplasmic/endoplasmic reticulum calcium ATPase 2	P16615		11
	Collagen alpha-1(XVII) chain OS=Homo sapiens GN=COL17A1 PE=1 SV=3	Q9UMD9	3	5		Replication initiator 1 (Fragment)	E7EVL6	4	11
	Hemicentin-1 OS=Homo sapiens GN=HMCN1 PE=1 SV=2	Q96RW7	1	5		Heat shock 70 kDa protein 4L	O95757		11
	Laminin subunit beta-3 OS=Homo sapiens GN=LAMB3 PE=1 SV=1	Q13751	5	5		Lysine--tRNA ligase	Q15046	4	11
	ATP-citrate synthase OS=Homo sapiens GN=ACLY PE=1 SV=3	P53396	2	5		TBC1 domain family member 2B	Q9UPU7		11
	ELKS/Rab6-interacting/CAST family member 1 OS=Homo sapiens GN=ERC1 PE=1 SV=1	Q8IUD2	2	5		Poly(U)-binding-splicing factor PUF60	Q9UHX1	19	11
	Cullin-associated NEDD8-dissociated protein 2 OS=Homo sapiens GN=CAND2 PE=1 SV=3	O75155	4	5		pre-mRNA 3' end processing protein WDR33	Q9C0J8	9	11
	Chromobox protein homolog 6 OS=Homo sapiens GN=CBX6 PE=1 SV=1	O95503	3	5		Coatomer subunit beta	P53618	1	11
	Contactin-2 OS=Homo sapiens GN=CNTN2 PE=1 SV=1	Q02246		5		SNW domain-containing protein 1	Q13573	15	11
	DDB1- and CUL4-associated factor 15 OS=Homo sapiens GN=DCAF15 PE=1 SV=1	Q66K64		5		Intron-binding protein aquarius	O60306	19	11
	40S ribosomal protein S8 OS=Homo sapiens GN=RPS8 PE=1 SV=2	P62241	6	5		Probable ATP-dependent RNA helicase DDX41	Q9UJV9	16	11
	Cancer-related nucleoside-triphosphatase OS=Homo sapiens GN=NTPCR PE=1 SV=1	Q9BSD7	3	5		RING finger protein 219	Q5W0B1	2	11
	Cubilin OS=Homo sapiens GN=CUBN PE=1 SV=5	O60494	3	5		Insulin receptor substrate 4	O14654	3	11
	40S ribosomal protein S7 OS=Homo sapiens GN=RPS7 PE=1 SV=1	P62081		5		Metastasis-associated protein MTA2	O94776	4	11
	Ankyrin and armadillo repeat-containing protein OS=Homo sapiens GN=ANKAR PE=2 SV=3	Q7Z5J8	2	5		Nucleolar GTP-binding protein 2	Q13823	1	10
	Dynactin subunit 1 OS=Homo sapiens GN=DCTN1 PE=1 SV=3	Q14203	7	5		E3 ubiquitin-protein ligase RING2	Q99496	4	10
	AFG3-like protein 2 OS=Homo sapiens GN=AFG3L2 PE=1 SV=2	Q9Y4W6	2	5		Exosome complex component RRP42	Q15024	6	10
	2',3'-cyclic-nucleotide 3'-phosphodiesterase OS=Homo sapiens GN=CNP PE=1 SV=2	P09543	5	5		Glutaminyl-peptide cyclotransferase	Q16769	2	10
	Ig kappa chain V-I region EU OS=Homo sapiens PE=1 SV=1	P01598	7	5		La-related protein 4B	Q92615	9	10
	DnaJ homolog subfamily C member 7 OS=Homo sapiens GN=DNAJC7 PE=1 SV=2	Q99615	2	5		Heterochromatin protein 1-binding protein 3	Q5SSJ5		10
	Coiled-coil domain-containing protein 18 OS=Homo sapiens GN=CCDC18 PE=1 SV=1	Q5T9S5	4	5		Ribosome production factor 2 homolog	Q9H7B2		10
	Muscarinic acetylcholine receptor M2 OS=Homo sapiens GN=CHRM2 PE=1 SV=1	P08172	1	5		Double-stranded RNA-specific adenosine deaminase	P55265	10	10
	DnaJ homolog subfamily B member 2 OS=Homo sapiens GN=DNAJB2 PE=1 SV=3	P25686	8	5		Exportin-1	O14980	4	10
	Multiple PDZ domain protein OS=Homo sapiens GN=MPDZ PE=1 SV=2	O75970	4	5		Crk-like protein	P46109	16	10
	E3 ubiquitin-protein ligase TRIM21 OS=Homo sapiens GN=TRIM21 PE=1 SV=1	P19474	2	5		DNA-directed RNA polymerase	C9J2Y9		10
	Bone morphogenetic protein receptor type-2 OS=Homo sapiens GN=BMPR2 PE=1 SV=2	Q13873	5	5		Coatomer subunit alpha	P53621	1	10
	60S ribosomal protein L28 OS=Homo sapiens GN=RPL28 PE=1 SV=3	P46779	4	5		Trypsin-1 (Fragment)	H0Y8D1		10
	39S ribosomal protein L12, mitochondrial OS=Homo sapiens GN=MRPL12 PE=1 SV=2	P52815	3	5		SAFB-like transcription modulator	Q9NWH9	16	10
	60S ribosomal protein L34 OS=Homo sapiens GN=RPL34 PE=1 SV=3	P49207	3	5		26S proteasome non-ATPase regulatory subunit 3	O43242	6	10
	Mitotic checkpoint protein BUB3 OS=Homo sapiens GN=BUB3 PE=1 SV=1	O43684	2	5		Uncharacterized protein	A0A0B4J2E5	3	10
	ATPase family AAA domain-containing protein 3B OS=Homo sapiens GN=ATAD3B PE=1 SV=1	Q5T9A4	3	5		Trifunctional enzyme subunit alpha, mitochondrial	P40939	5	10
	28S ribosomal protein S26, mitochondrial OS=Homo sapiens GN=MRPS26 PE=1 SV=1	Q9BYN8	2	5		Nucleolar transcription factor 1	E9PKP7	6	10
	Lysine--tRNA ligase OS=Homo sapiens GN=KARS PE=1 SV=3	Q15046	9	5		Endoplasmin	P14625	6	10
	Cell death regulator Aven OS=Homo sapiens GN=AVEN PE=1 SV=1	Q9NQS1	3	5		Emerin	P50402	4	10
	40S ribosomal protein S15 OS=Homo sapiens GN=RPS15 PE=1 SV=2	P62841	5	5		Activating signal cointegrator 1 complex subunit 3	Q8N3C0	11	10
	Kelch-like protein 21 OS=Homo sapiens GN=KLHL21 PE=1 SV=4	Q9UJP4	2	5		Pentatricopeptide repeat domain-containing protein 3, mitochondrial	Q96EY7	3	10
	Ig heavy chain V-III region GAL OS=Homo sapiens PE=1 SV=1	P01781	6	5		DBF4-type zinc finger-containing protein 2	N0DVX5	37	10
	Centromere protein F OS=Homo sapiens GN=CENPF PE=1 SV=2	P49454		5		60S ribosomal protein L13	P26373	2	10
	Dapper homolog 3 OS=Homo sapiens GN=DACT3 PE=1 SV=2	Q96B18	1	5		Methionine--tRNA ligase, cytoplasmic	P56192	14	10
	Major prion protein OS=Homo sapiens GN=PRNP PE=1 SV=1	P04156	1	5		PIN2/TERF1-interacting telomerase inhibitor 1	Q96BK5	3	10
	Cortactin-binding protein 2 OS=Homo sapiens GN=CTTNBP2 PE=1 SV=1	Q8WZ74	4	5		Tubulin beta chain	Q5JP53	3	10
	Antigen KI-67 OS=Homo sapiens GN=MKI67 PE=1 SV=2	P46013	3	5		Regulator of nonsense transcripts 3B	Q9BZI7	10	9
	DNA-directed RNA polymerase II subunit RPB1 OS=Homo sapiens GN=POLR2A PE=1 SV=2	P24928	5	5		Dolichyl-diphosphooligosaccharide--protein glycosyltransferase subunit 2	P04844	2	9
	Collagen alpha-1(XVI) chain OS=Homo sapiens GN=COL16A1 PE=1 SV=2	Q07092	4	5		RNA-binding motif protein, X-linked 2	A0A087WUI1		9
	Exosome complex exonuclease RRP44 OS=Homo sapiens GN=DIS3 PE=1 SV=2	Q9Y2L1	1	5		Dolichyl-diphosphooligosaccharide--protein glycosyltransferase subunit 1	P04843	2	9
	Breast carcinoma-amplified sequence 1 OS=Homo sapiens GN=BCAS1 PE=1 SV=2	O75363	5	5		RNA-binding protein 4B	Q9BQ04		9
	Alpha-tectorin OS=Homo sapiens GN=TECTA PE=1 SV=3	O75443	4	5		Ran GTPase-activating protein 1	P46060	2	9
	Calcium-binding mitochondrial carrier protein Aralar2 OS=Homo sapiens GN=SLC25A13 PE=1 SV=2	Q9UJS0	11	5		Calnexin	P27824	2	9
	E3 ubiquitin-protein ligase RAD18 OS=Homo sapiens GN=RAD18 PE=1 SV=2	Q9NS91	3	5		Transcription elongation regulator 1	O14776	19	9
	Glycerol-3-phosphate dehydrogenase, mitochondrial OS=Homo sapiens GN=GPD2 PE=1 SV=3	P43304	2	5		28S ribosomal protein S35, mitochondrial	P82673		9
	CD44 antigen OS=Homo sapiens GN=CD44 PE=1 SV=3	P16070	1	5		Arginine--tRNA ligase, cytoplasmic	P54136	11	9
	Phosphate carrier protein, mitochondrial OS=Homo sapiens GN=SLC25A3 PE=1 SV=2	Q00325	10	5		A-kinase anchor protein 8-like	Q9ULX6	2	9
	Splicing factor 3A subunit 1 OS=Homo sapiens GN=SF3A1 PE=1 SV=1	Q15459	4	5		Protein Daple	Q9P219	5	9
	U1 small nuclear ribonucleoprotein A OS=Homo sapiens GN=SNRPA PE=1 SV=3	P09012	2	5		Rho GTPase-activating protein 9 (Fragment)	H0YI36	11	9
	Ubiquitin-associated protein 2-like OS=Homo sapiens GN=UBAP2L PE=1 SV=2	Q14157	4	5		Ubiquitin carboxyl-terminal hydrolase 15	Q9Y4E8	4	9
	Splicing factor 3B subunit 3 OS=Homo sapiens GN=SF3B3 PE=1 SV=4	Q15393	5	5		Scaffold attachment factor B1	Q15424	10	9
	Obscurin OS=Homo sapiens GN=OBSCN PE=1 SV=3	Q5VST9	1	5		Ribonuclease P protein subunit p38	P78345		9
	Prolactin receptor OS=Homo sapiens GN=PRLR PE=1 SV=1	P16471	5	5		WD repeat-containing protein 46	O15213	3	9
	Src substrate cortactin OS=Homo sapiens GN=CTTN PE=1 SV=2	Q14247	2	5		Cleavage and polyadenylation specific factor 3, 73kDa, isoform CRA_b	G5E9W3	8	9
	REM2- and Rab-like small GTPase 1 OS=Homo sapiens GN=RSG1 PE=2 SV=2	Q9BU20	15	5		Nucleolar protein 10	Q9BSC4	5	9
	Sorting nexin-20 OS=Homo sapiens GN=SNX20 PE=1 SV=1	Q7Z614	1	5		Y-box-binding protein 3	P16989		9
	Pre-mRNA-processing-splicing factor 8 OS=Homo sapiens GN=PRPF8 PE=1 SV=2	Q6P2Q9	4	5		Importin subunit alpha-5	P52294		9
	Protein Shroom3 OS=Homo sapiens GN=SHROOM3 PE=1 SV=2	Q8TF72	3	5		ATPase WRNIP1	Q96S55	1	9
	Rho guanine nucleotide exchange factor 25 OS=Homo sapiens GN=ARHGEF25 PE=1 SV=2	Q86VW2	3	5		Dimethyladenosine transferase 1, mitochondrial	Q8WVM0	1	9
	Ribosome-binding protein 1 OS=Homo sapiens GN=RRBP1 PE=1 SV=4	Q9P2E9	2	5		Uncharacterized protein C11orf84	Q9BUA3	15	9
	Uncharacterized protein C9orf84 OS=Homo sapiens GN=C9orf84 PE=2 SV=1	Q5VXU9	9	5		G patch domain-containing protein 4 (Fragment)	F8W895		9
	Uncharacterized protein C20orf195 OS=Homo sapiens GN=C20orf195 PE=2 SV=1	Q9BVV2	3	5		Nucleolar and coiled-body phosphoprotein 1	Q14978		9
	Regulator of telomere elongation helicase 1 OS=Homo sapiens GN=RTEL1 PE=4 SV=1	D6RBA3	4	5		Insulin-like growth factor 2 mRNA-binding protein 2	Q9Y6M1	9	9
	tRNA (cytosine(34)-C(5))-methyltransferase OS=Homo sapiens GN=NSUN2 PE=1 SV=2	Q08J23	3	5		Protein transport protein Sec61 subunit alpha isoform 1	P61619	4	9
	Voltage-dependent anion-selective channel protein 2 OS=Homo sapiens GN=VDAC2 PE=1 SV=2	P45880	5	5		Signal recognition particle subunit SRP68	Q9UHB9	3	9
	Ras GTPase-activating protein-binding protein 1 OS=Homo sapiens GN=G3BP1 PE=1 SV=1	Q13283	3	5		Nuclear pore complex protein Nup133	Q8WUM0	8	9
	Putative heat shock protein HSP 90-beta 2 OS=Homo sapiens GN=HSP90AB2P PE=1 SV=2	Q58FF8	4	5		Pre-rRNA-processing protein TSR1 homolog	Q2NL82	20	9
	Protein enabled homolog OS=Homo sapiens GN=ENAH PE=1 SV=2	Q8N8S7	2	5		Exosome complex component RRP43	Q96B26	4	9
	Vesicle-trafficking protein SEC22b OS=Homo sapiens GN=SEC22B PE=1 SV=4	O75396	3	5		Putative pre-mRNA-splicing factor ATP-dependent RNA helicase DHX16	O60231	6	9
	Septin-9 OS=Homo sapiens GN=SEPT9 PE=1 SV=2	Q9UHD8	9	5		THO complex subunit 1	A0A087WWS1	13	9
	Threonine--tRNA ligase, mitochondrial OS=Homo sapiens GN=TARS2 PE=1 SV=1	Q9BW92	1	5		Serine/arginine-rich splicing factor 12	Q8WXF0	13	9
	Ventricular zone-expressed PH domain-containing protein homolog 1 OS=Homo sapiens GN=VEPH1 PE=1 SV=1	Q14D04	6	5		Tuftelin-interacting protein 11	Q9UBB9	7	9
	Sodium/potassium-transporting ATPase subunit alpha-3 (Fragment) OS=Homo sapiens GN=ATP1A3 PE=3 SV=1	E9PC51	2	5		Tumor suppressor p53-binding protein 1	A6NNK5		9
	Pyruvate dehydrogenase E1 component subunit beta, mitochondrial OS=Homo sapiens GN=PDHB PE=1 SV=3	P11177	10	5		BUD13 homolog	Q9BRD0	3	8
	Serine/arginine-rich splicing factor 3 OS=Homo sapiens GN=SRSF3 PE=1 SV=1	P84103	6	5		RNA polymerase-associated protein LEO1	Q8WVC0		8
	Short stature homeobox protein 2 OS=Homo sapiens GN=SHOX2 PE=2 SV=4	O60902		5		Nascent polypeptide-associated complex subunit alpha	F8VZJ2	8	8
	Nesprin-1 OS=Homo sapiens GN=SYNE1 PE=1 SV=4	Q8NF91	1	5		Fanconi anemia group I protein	Q9NVI1		8
	Transient receptor potential cation channel subfamily M member 5 OS=Homo sapiens GN=TRPM5 PE=1 SV=1	Q9NZQ8		5		Exosome complex component RRP45	D6RIY6	4	8
	Reticulocalbin-2 OS=Homo sapiens GN=RCN2 PE=1 SV=1	Q14257	5	5		Clathrin light chain A	P09496	4	8
	Serine/arginine-rich splicing factor 1 OS=Homo sapiens GN=SRSF1 PE=1 SV=2	Q07955	5	5		Probable ATP-dependent RNA helicase DHX37	Q8IY37		8
	C-terminal-binding protein 2 OS=Homo sapiens GN=CTBP2 PE=1 SV=1	P56545	4	4		U3 small nucleolar RNA-associated protein 18 homolog	Q9Y5J1	3	8
	40S ribosomal protein S2 OS=Homo sapiens GN=RPS2 PE=1 SV=2	P15880	1	4		Eukaryotic translation initiation factor 3 subunit L	Q9Y262	12	8
	C-terminal-binding protein 1 OS=Homo sapiens GN=CTBP1 PE=1 SV=2	Q13363	3	4		Eukaryotic translation initiation factor 2A	Q9BY44	8	8
	BTB/POZ domain-containing adapter for CUL3-mediated RhoA degradation protein 3 OS=Homo sapiens GN=KCTD10 PE=1 SV=1	Q9H3F6	1	4		PHD and RING finger domain-containing protein 1	E9PJ24	9	8
	Ankyrin-3 OS=Homo sapiens GN=ANK3 PE=1 SV=3	Q12955	2	4		Protein IGKV2D-24 (Fragment)	A0A075B6R9	11	8
	EF-hand domain-containing protein D2 OS=Homo sapiens GN=EFHD2 PE=1 SV=1	Q96C19	4	4		Nuclease-sensitive element-binding protein 1	A0A087X1S2		8
	40S ribosomal protein S14 OS=Homo sapiens GN=RPS14 PE=1 SV=3	P62263	3	4		Structural maintenance of chromosomes protein	E9PD53	10	8
	Acetyl-CoA acetyltransferase, mitochondrial OS=Homo sapiens GN=ACAT1 PE=1 SV=1	P24752	4	4		AFG3-like protein 2	Q9Y4W6	3	8
	Glutamate dehydrogenase 1, mitochondrial OS=Homo sapiens GN=GLUD1 PE=1 SV=2	P00367	6	4		E3 ubiquitin-protein ligase MYCBP2	O75592	7	8
	Histone deacetylase 1 OS=Homo sapiens GN=HDAC1 PE=1 SV=1	Q13547		4		E3 ubiquitin-protein ligase HECTD1	Q9ULT8		8
	Aspartyl/asparaginyl beta-hydroxylase OS=Homo sapiens GN=ASPH PE=1 SV=3	Q12797	1	4		Anaphase-promoting complex subunit 7	Q9UJX3		8
	Homer protein homolog 3 OS=Homo sapiens GN=HOMER3 PE=1 SV=2	Q9NSC5		4		Nuclear pore complex protein Nup107	P57740	9	8
	Merlin OS=Homo sapiens GN=NF2 PE=1 SV=1	P35240		4		Dynactin subunit 1	E7EX90	11	8
	Lon protease homolog, mitochondrial OS=Homo sapiens GN=LONP1 PE=1 SV=2	P36776	1	4		Guanine nucleotide-binding protein G(i) subunit alpha-2	P04899		8
	Alkyldihydroxyacetonephosphate synthase, peroxisomal OS=Homo sapiens GN=AGPS PE=1 SV=1	O00116	2	4		DnaJ homolog subfamily C member 10	Q8IXB1	7	8
	CTP synthase 1 OS=Homo sapiens GN=CTPS1 PE=1 SV=2	P17812	6	4		28S ribosomal protein S31, mitochondrial	Q92665	2	8
	60S ribosomal protein L23a OS=Homo sapiens GN=RPL23A PE=1 SV=1	P62750	3	4		DNA-directed RNA polymerase, mitochondrial	O00411	6	8
	G protein-regulated inducer of neurite outgrowth 1 OS=Homo sapiens GN=GPRIN1 PE=1 SV=2	Q7Z2K8		4		COP9 signalosome complex subunit 5	Q92905		8
	LIM and calponin homology domains-containing protein 1 OS=Homo sapiens GN=LIMCH1 PE=1 SV=4	Q9UPQ0	2	4		Elongation factor 1-alpha 1	P68104		8
	Collagen alpha-1(X) chain OS=Homo sapiens GN=COL10A1 PE=1 SV=2	Q03692	1	4		Serine/threonine-protein kinase 38-like	Q9Y2H1	7	8
	A-kinase anchor protein 2 OS=Homo sapiens GN=AKAP2 PE=1 SV=3	Q9Y2D5	2	4		Kinesin-like protein KIF2A	O00139	8	8
	Lysosomal-trafficking regulator OS=Homo sapiens GN=LYST PE=1 SV=3	Q99698		4		Transcription elongation factor SPT6	Q7KZ85		8
	Armadillo repeat-containing X-linked protein 4 OS=Homo sapiens GN=ARMCX4 PE=2 SV=2	Q5H9R4	10	4		Kinesin-like protein KIFC1	Q9BW19	2	8
	Kinesin-1 heavy chain OS=Homo sapiens GN=KIF5B PE=1 SV=1	P33176	4	4		Lamina-associated polypeptide 2, isoform alpha	P42166	8	8
	Gamma-aminobutyric acid receptor subunit alpha-1 OS=Homo sapiens GN=GABRA1 PE=1 SV=3	P14867	2	4		Major centromere autoantigen B	P07199	2	8
	Calnexin OS=Homo sapiens GN=CANX PE=1 SV=2	P27824	5	4		cAMP-dependent protein kinase catalytic subunit alpha	P17612		8
	Histone-lysine N-methyltransferase SETD1B OS=Homo sapiens GN=SETD1B PE=1 SV=2	Q9UPS6	1	4		Histone H2A type 1-H	Q96KK5	8	8
	Kelch-like protein 15 OS=Homo sapiens GN=KLHL15 PE=1 SV=2	Q96M94	3	4		DNA replication licensing factor MCM4	P33991		8
	Autism susceptibility gene 2 protein OS=Homo sapiens GN=AUTS2 PE=1 SV=1	Q8WXX7	1	4		Centrosomal protein of 135 kDa	Q66GS9		8
	Brain-specific angiogenesis inhibitor 1-associated protein 2 OS=Homo sapiens GN=BAIAP2 PE=1 SV=1	Q9UQB8	1	4		Uncharacterized protein C17orf85	Q53F19	12	7
	Actin-related protein 2/3 complex subunit 4 OS=Homo sapiens GN=ARPC4 PE=1 SV=3	P59998	1	4		CTP synthase 1	P17812	3	7
	60S acidic ribosomal protein P0 OS=Homo sapiens GN=RPLP0 PE=1 SV=1	P05388	2	4		HBS1-like protein	B7Z524	2	7
	Homeobox protein Hox-B3 OS=Homo sapiens GN=HOXB3 PE=3 SV=1	F8VXG0	1	4		Lamina-associated polypeptide 2, isoforms beta/gamma	P42167	8	7
	Collagen alpha-1(III) chain OS=Homo sapiens GN=COL3A1 PE=1 SV=4	P02461	1	4		E3 ubiquitin-protein ligase HERC2	O95714	3	7
	Elongator complex protein 3 OS=Homo sapiens GN=ELP3 PE=1 SV=2	Q9H9T3	1	4		La-related protein 4 (Fragment)	X6RLN4	3	7
	Kinesin-like protein KIF26A OS=Homo sapiens GN=KIF26A PE=1 SV=3	Q9ULI4		4		La-related protein 7	Q4G0J3	4	7
	AT-rich interactive domain-containing protein 4B OS=Homo sapiens GN=ARID4B PE=1 SV=2	Q4LE39	6	4		Aurora kinase B (Fragment)	J3KTD6		7
	Medium-chain specific acyl-CoA dehydrogenase, mitochondrial OS=Homo sapiens GN=ACADM PE=1 SV=1	P11310	2	4		Pyruvate dehydrogenase E1 component subunit beta, mitochondrial	P11177	8	7
	Fructose-1,6-bisphosphatase 1 OS=Homo sapiens GN=FBP1 PE=1 SV=5	P09467	1	4		Pyruvate kinase PKM	P14618		7
	Kinesin-like protein KIF14 OS=Homo sapiens GN=KIF14 PE=1 SV=1	Q15058		4		Double-strand-break repair protein rad21 homolog	O60216		7
	40S ribosomal protein S9 OS=Homo sapiens GN=RPS9 PE=1 SV=3	P46781	10	4		Crooked neck-like protein 1	Q5JY65	10	7
	Cytoplasmic dynein 1 heavy chain 1 OS=Homo sapiens GN=DYNC1H1 PE=1 SV=5	Q14204	7	4		Band 4.1-like protein 3	A0A0A0MRA8	5	7
	Collagen alpha-1(XII) chain OS=Homo sapiens GN=COL12A1 PE=1 SV=2	Q99715		4		Lysine-rich nucleolar protein 1	Q1ED39		7
	Leucine-rich repeat flightless-interacting protein 1 OS=Homo sapiens GN=LRRFIP1 PE=1 SV=2	Q32MZ4		4		Regulation of nuclear pre-mRNA domain-containing protein 2	Q5VT52	1	7
	60S ribosomal protein L7a OS=Homo sapiens GN=RPL7A PE=1 SV=2	P62424	5	4		Nuclear pore complex protein Nup93	Q8N1F7	6	7
	Kinesin light chain 1 (Fragment) OS=Homo sapiens GN=KLC1 PE=4 SV=1	H0YJL0	2	4		Importin subunit alpha-3	O00629	4	7
	MAP7 domain-containing protein 3 OS=Homo sapiens GN=MAP7D3 PE=1 SV=2	Q8IWC1		4		Influenza virus NS1A-binding protein	Q9Y6Y0	10	7
	MAP kinase-activating death domain protein OS=Homo sapiens GN=MADD PE=1 SV=2	Q8WXG6	1	4		Exportin-T	O43592	2	7
	Glyceraldehyde-3-phosphate dehydrogenase OS=Homo sapiens GN=GAPDH PE=1 SV=3	P04406	1	4		Exportin-5	Q9HAV4	5	7
	E3 ubiquitin-protein ligase SMURF2 OS=Homo sapiens GN=SMURF2 PE=1 SV=1	Q9HAU4	1	4		THO complex subunit 6 homolog	Q86W42	5	7
	Collagen alpha-2(V) chain OS=Homo sapiens GN=COL5A2 PE=1 SV=3	P05997	3	4		Cullin-9	E9PEZ1		7
	LanC-like protein 1 OS=Homo sapiens GN=LANCL1 PE=1 SV=1	O43813	2	4		CDK5 regulatory subunit-associated protein 2	Q96SN8		7
	Coatomer subunit beta OS=Homo sapiens GN=COPB1 PE=1 SV=3	P53618		4		Poly(rC)-binding protein 1	Q15365	5	7
	Deleted in bladder cancer protein 1 OS=Homo sapiens GN=DBC1 PE=1 SV=2	O60477	5	4		Survival motor neuron protein	E7EQZ4	10	7
	Methylcytosine dioxygenase TET2 OS=Homo sapiens GN=TET2 PE=1 SV=3	Q6N021	3	4		Integrator complex subunit 1	Q8N201	2	7
	BAG family molecular chaperone regulator 2 OS=Homo sapiens GN=BAG2 PE=1 SV=1	O95816	2	4		Probable ATP-dependent RNA helicase DDX20	Q9UHI6	5	7
	Cadherin-related family member 5 OS=Homo sapiens GN=CDHR5 PE=1 SV=3	Q9HBB8	3	4		General transcription factor 3C polypeptide 4	Q9UKN8	8	7
	F-box only protein 41 OS=Homo sapiens GN=FBXO41 PE=2 SV=5	Q8TF61	4	4		Probable ATP-dependent RNA helicase DDX52	Q9Y2R4	7	7
	Myeloid/lymphoid or mixed-lineage leukemia (Trithorax homolog, Drosophila); translocated to, 10 (Fragment) OS=Homo sapiens GN=MLLT10 PE=2 SV=1	Q5JT35	2	4		General transcription factor 3C polypeptide 3	Q9Y5Q9	3	7
	Ezrin OS=Homo sapiens GN=EZR PE=1 SV=4	P15311	1	4		Plastin-3	A0A0A0MSQ0		7
	Calcium-binding mitochondrial carrier protein Aralar1 OS=Homo sapiens GN=SLC25A12 PE=1 SV=2	O75746	6	4		60S ribosomal protein L29	P47914	1	7
	Ig kappa chain V-I region Wes OS=Homo sapiens PE=1 SV=1	P01611	5	4		Eukaryotic translation initiation factor 3 subunit M	Q7L2H7		7
	Integrin beta-5 OS=Homo sapiens GN=ITGB5 PE=1 SV=1	P18084	4	4		Probable ubiquitin carboxyl-terminal hydrolase FAF-X	Q93008	2	7
	Adenosylhomocysteinase OS=Homo sapiens GN=AHCY PE=1 SV=4	P23526	4	4		WD repeat-containing protein 43	Q15061	1	7
	Heterogeneous nuclear ribonucleoprotein H3 OS=Homo sapiens GN=HNRNPH3 PE=1 SV=2	P31942	7	4		Zinc finger protein 281	Q9Y2X9		7
	Msx2-interacting protein OS=Homo sapiens GN=SPEN PE=1 SV=1	Q96T58	3	4		Serine/threonine-protein phosphatase 6 regulatory subunit 1	Q9UPN7		7
	B-cell lymphoma/leukemia 11B OS=Homo sapiens GN=BCL11B PE=1 SV=1	Q9C0K0	6	4		AP-3 complex subunit beta-1	O00203		7
	Dynein heavy chain 8, axonemal OS=Homo sapiens GN=DNAH8 PE=1 SV=2	Q96JB1	5	4		Pericentriolar material 1 protein	A6NNN6		7
	Ceruloplasmin OS=Homo sapiens GN=CP PE=1 SV=1	P00450	5	4		Serine/threonine-protein kinase MRCK beta (Fragment)	H0YLY0	4	7
	Heterogeneous nuclear ribonucleoprotein A/B OS=Homo sapiens GN=HNRNPAB PE=4 SV=1	D6RD18	1	4		SWI/SNF complex subunit SMARCC2	Q8TAQ2	4	7
	28S ribosomal protein S27, mitochondrial OS=Homo sapiens GN=MRPS27 PE=1 SV=3	Q92552	3	4		Splicing factor U2AF 35 kDa subunit	Q01081	10	7
	GTP-binding protein 1 OS=Homo sapiens GN=GTPBP1 PE=1 SV=3	O00178	2	4		RNA polymerase-associated protein CTR9 homolog	Q6PD62		7
	Dynein heavy chain 6, axonemal OS=Homo sapiens GN=DNAH6 PE=1 SV=3	Q9C0G6	2	4		Heat shock protein 75 kDa, mitochondrial	Q12931	3	7
	Cardiomyopathy-associated protein 5 OS=Homo sapiens GN=CMYA5 PE=1 SV=3	Q8N3K9	5	4		C-1-tetrahydrofolate synthase, cytoplasmic	P11586		7
	Ig lambda chain V-IV region Bau OS=Homo sapiens PE=1 SV=1	P01715	9	4		28S ribosomal protein S5, mitochondrial	P82675		7
	DDB1- and CUL4-associated factor 7 OS=Homo sapiens GN=DCAF7 PE=1 SV=1	P61962	1	4		Acyl-CoA dehydrogenase family member 11	Q709F0	2	7
	ADP-ribosylation factor 4 OS=Homo sapiens GN=ARF4 PE=1 SV=3	P18085	4	4		DNA replication licensing factor MCM6	Q14566	1	7
	BAH and coiled-coil domain-containing protein 1 OS=Homo sapiens GN=BAHCC1 PE=1 SV=3	Q9P281	7	4		Activity-dependent neuroprotector homeobox protein	Q9H2P0	2	7
	Methionine--tRNA ligase, cytoplasmic OS=Homo sapiens GN=MARS PE=1 SV=2	P56192	3	4		Mov10, Moloney leukemia virus 10, homolog (Mouse), isoform CRA_a	Q5JR04	12	7
	Inhibitor of nuclear factor kappa-B kinase subunit beta OS=Homo sapiens GN=IKBKB PE=1 SV=1	O14920	1	4		BTB/POZ domain-containing protein KCTD17	A0A087WX35	8	7
	Myosin light chain kinase, smooth muscle OS=Homo sapiens GN=MYLK PE=1 SV=4	Q15746	1	4		LIM domain and actin-binding protein 1	Q9UHB6	11	6
	116 kDa U5 small nuclear ribonucleoprotein component OS=Homo sapiens GN=EFTUD2 PE=1 SV=1	Q15029	2	4		Lamin-B2	Q03252	4	6
	Methylcrotonoyl-CoA carboxylase beta chain, mitochondrial OS=Homo sapiens GN=MCCC2 PE=1 SV=1	Q9HCC0	1	4		Mitotic checkpoint protein BUB3 (Fragment)	J3QT28	3	6
	2-oxoglutarate dehydrogenase-like, mitochondrial OS=Homo sapiens GN=OGDHL PE=1 SV=3	Q9ULD0	1	4		E3 ubiquitin-protein ligase CHIP	Q9UNE7		6
	14-3-3 protein epsilon OS=Homo sapiens GN=YWHAE PE=1 SV=1	P62258	2	4		Tudor domain-containing protein 3	Q9H7E2	2	6
	Methyl-CpG-binding domain protein 5 OS=Homo sapiens GN=MBD5 PE=1 SV=3	Q9P267	2	4		Splicing factor, arginine/serine-rich 15	O95104	8	6
	FAST kinase domain-containing protein 3 OS=Homo sapiens GN=FASTKD3 PE=2 SV=2	Q14CZ7	3	4		Probable ATP-dependent RNA helicase YTHDC2	Q9H6S0	5	6
	Alpha-actinin-4 (Fragment) OS=Homo sapiens GN=ACTN4 PE=4 SV=1	H7C144		4		WASH complex subunit FAM21A	E7ESD2		6
	Calponin-2 OS=Homo sapiens GN=CNN2 PE=1 SV=4	Q99439	2	4		Translation initiation factor eIF-2B subunit epsilon	E9PC74		6
	Afadin OS=Homo sapiens GN=MLLT4 PE=1 SV=3	P55196	5	4		WD repeat-containing protein 5	P61964	1	6
	E3 ubiquitin-protein ligase HERC2 OS=Homo sapiens GN=HERC2 PE=1 SV=2	O95714	1	4		Hsp70-binding protein 1 (Fragment)	K7EMM7		6
	Guanine nucleotide-binding protein G(i) subunit alpha-1 OS=Homo sapiens GN=GNAI1 PE=1 SV=2	P63096		4		Protein PRRC2A	P48634	2	6
	DnaJ homolog subfamily C member 10 OS=Homo sapiens GN=DNAJC10 PE=1 SV=2	Q8IXB1	7	4		Casein kinase I isoform alpha	P48729	10	6
	Fatty acid-binding protein, epidermal OS=Homo sapiens GN=FABP5 PE=1 SV=3	Q01469	4	4		Paraspeckle component 1	Q8WXF1	4	6
	Rho-related BTB domain-containing protein 3 OS=Homo sapiens GN=RHOBTB3 PE=1 SV=2	O94955	2	4		PCI domain-containing protein 2	Q5JVF3	2	6
	WD repeat-containing protein 48 OS=Homo sapiens GN=WDR48 PE=1 SV=1	Q8TAF3	1	4		Nucleolar and coiled-body phosphoprotein 1	S4R341		6
	Pericentrin OS=Homo sapiens GN=PCNT PE=1 SV=4	O95613	2	4		Protein FAM208B	Q5VWN6	3	6
	Polycystin-1 OS=Homo sapiens GN=PKD1 PE=1 SV=3	P98161	7	4		Condensin complex subunit 2	E9PHA2		6
	Peripherin OS=Homo sapiens GN=PRPH PE=1 SV=2	P41219	2	4		RNA-binding protein Musashi homolog 1	O43347	2	6
	RNA binding protein fox-1 homolog 1 OS=Homo sapiens GN=RBFOX1 PE=1 SV=2	Q9NWB1	1	4		Epiplakin	A0A075B730		6
	Serologically defined colon cancer antigen 8 OS=Homo sapiens GN=SDCCAG8 PE=1 SV=1	Q86SQ7		4		Ribonucleases P/MRP protein subunit POP1	Q99575		6
	Splicing factor 1 OS=Homo sapiens GN=SF1 PE=1 SV=4	Q15637	3	4		Nucleolar protein 7	Q9UMY1	4	6
	Unconventional myosin-XV OS=Homo sapiens GN=MYO15A PE=1 SV=2	Q9UKN7	1	4		Histone deacetylase 6	Q9UBN7	8	6
	Phosphatidylinositol 3,4,5-trisphosphate 5-phosphatase 1 OS=Homo sapiens GN=INPP5D PE=1 SV=2	Q92835	5	4		E3 ubiquitin-protein ligase RNF213	A0A0A0MTR7	2	6
	Vacuolar protein sorting-associated protein 13A OS=Homo sapiens GN=VPS13A PE=1 SV=2	Q96RL7		4		AP-3 complex subunit beta-2	Q13367	11	6
	PHD finger protein 14 OS=Homo sapiens GN=PHF14 PE=1 SV=2	O94880	2	4		Chromosome 1 open reading frame 131, isoform CRA_a	Q5TBH9	1	6
	Utrophin OS=Homo sapiens GN=UTRN PE=1 SV=2	P46939	2	4		Vacuolar protein sorting-associated protein 35	Q96QK1	2	6
	RNA-binding protein EWS OS=Homo sapiens GN=EWSR1 PE=1 SV=1	Q01844	2	4		U4/U6.U5 tri-snRNP-associated protein 2	B9A018	12	6
	UPF0577 protein KIAA1324-like OS=Homo sapiens GN=KIAA1324L PE=2 SV=2	A8MWY0		4		GC-rich sequence DNA-binding factor 2	P16383		6
	Septin-11 OS=Homo sapiens GN=SEPT11 PE=1 SV=3	Q9NVA2	2	4		A-kinase anchor protein 11	Q9UKA4	1	6
	RNA-binding protein 39 OS=Homo sapiens GN=RBM39 PE=1 SV=2	Q14498	1	4		26S proteasome non-ATPase regulatory subunit 2	Q13200	9	6
	Poly(rC)-binding protein 2 OS=Homo sapiens GN=PCBP2 PE=1 SV=1	Q15366	2	4		COP9 signalosome complex subunit 4	Q9BT78		6
	RNA-binding protein 25 OS=Homo sapiens GN=RBM25 PE=1 SV=3	P49756	7	4		Cleavage and polyadenylation-specificity factor subunit 6	F8WJN3	7	6
	RNA-binding protein 14 OS=Homo sapiens GN=RBM14 PE=1 SV=2	Q96PK6	2	4		Poly(rC)-binding protein 2 (Fragment)	H3BRU6		6
	Versican core protein OS=Homo sapiens GN=VCAN PE=1 SV=3	P13611	1	4		Replication factor C subunit 4	P35249		6
	RNA-binding protein 10 OS=Homo sapiens GN=RBM10 PE=1 SV=3	P98175	4	4		Zinc finger and BTB domain-containing protein 24	O43167		6
	POC1 centriolar protein homolog A OS=Homo sapiens GN=POC1A PE=4 SV=1	E9PFC6	2	4		A-kinase anchor protein 8	O43823	6	6
	Ryanodine receptor 1 OS=Homo sapiens GN=RYR1 PE=1 SV=3	P21817	2	4		60S ribosomal protein L18	F8VYV2		6
	Vigilin OS=Homo sapiens GN=HDLBP PE=1 SV=2	Q00341	7	4		Alpha-actinin-4	O43707	7	6
	Platelet-activating factor acetylhydrolase OS=Homo sapiens GN=PLA2G7 PE=1 SV=1	Q13093	5	4		Scaffold attachment factor B2	Q14151	8	6
	Putative ATP-dependent RNA helicase DHX57 OS=Homo sapiens GN=DHX57 PE=1 SV=2	Q6P158	2	4		Replication factor C subunit 3	P40938	2	6
	Probable phospholipid-transporting ATPase IF OS=Homo sapiens GN=ATP11B PE=1 SV=2	Q9Y2G3	1	4		Bloom syndrome protein	H0YNU5	1	6
	Putative uncharacterized protein SPANXA2-OT1 OS=Homo sapiens GN=SPANXA2-OT1 PE=5 SV=1	Q8N9U9	5	4		Cyclin-dependent kinase 12	Q9NYV4	5	6
	Testis-expressed sequence 15 protein OS=Homo sapiens GN=TEX15 PE=1 SV=2	Q9BXT5	1	4		Cystathionine beta-synthase	P35520	7	6
	Tubulin beta-1 chain OS=Homo sapiens GN=TUBB1 PE=1 SV=1	Q9H4B7	2	4		Pre-mRNA-processing factor 40 homolog A	O75400	19	6
	Tubulin alpha-1A chain OS=Homo sapiens GN=TUBA1A PE=1 SV=1	Q71U36	5	4		Myelin expression factor 2	A0A0A0MQW0	2	6
	TTC7B protein (Fragment) OS=Homo sapiens GN=TTC7B PE=2 SV=1	Q6PIF1		4		F-actin-capping protein subunit alpha-2	P47755	7	6
	Putative uncharacterized protein FLJ44672 OS=Homo sapiens PE=2 SV=1	Q6ZQT7	1	4		Nuclear receptor coactivator 5	Q9HCD5	5	5
	Putative tropomyosin alpha-3 chain-like protein OS=Homo sapiens PE=5 SV=2	A6NL28	5	4		Centromere protein V	Q7Z7K6	2	5
	Putative PRAME family member 24 OS=Homo sapiens GN=PRAMEF24 PE=3 SV=1	A6NMC2	2	4		Putative ATP-dependent RNA helicase DHX57	Q6P158	2	5
	Toll-like receptor 3 OS=Homo sapiens GN=TLR3 PE=1 SV=1	O15455	5	4		RWD domain-containing protein 1 (Fragment)	E5RGQ3		5
	Tenascin-X OS=Homo sapiens GN=TNXB PE=1 SV=3	P22105	3	4		DNA-directed RNA polymerase II subunit RPB3	P19387	6	5
	TPR and ankyrin repeat-containing protein 1 OS=Homo sapiens GN=TRANK1 PE=2 SV=4	O15050	1	4		La-related protein 1B	Q659C4		5
	T-complex protein 1 subunit zeta-2 OS=Homo sapiens GN=CCT6B PE=1 SV=5	Q92526	1	4		Regulation of nuclear pre-mRNA domain-containing protein 1B	Q9NQG5		5
	Tropomyosin 2 (Beta) OS=Homo sapiens GN=TPM2 PE=2 SV=1	Q5TCU3		4		5-methylcytosine rRNA methyltransferase NSUN4	Q96CB9	1	5
	Protein FAM98B OS=Homo sapiens GN=FAM98B PE=1 SV=1	Q52LJ0	5	4		Core histone macro-H2A.2	Q9P0M6		5
	Protein GPR108 OS=Homo sapiens GN=GPR108 PE=2 SV=3	Q9NPR9	1	4		Protein argonaute-2	Q9UKV8	10	5
	Tricarboxylate transport protein, mitochondrial OS=Homo sapiens GN=SLC25A1 PE=1 SV=2	P53007	3	4		Nuclear pore complex protein Nup155	E9PF10	4	5
	Transcriptional activator protein Pur-beta OS=Homo sapiens GN=PURB PE=1 SV=3	Q96QR8	2	4		Activator of basal transcription 1	Q9ULW3	3	5
	Protein patched homolog 2 OS=Homo sapiens GN=PTCH2 PE=2 SV=2	Q9Y6C5	2	4		DNA-binding protein SATB2	Q9UPW6	9	5
	Transmembrane protein 200C OS=Homo sapiens GN=TMEM200C PE=2 SV=2	A6NKL6	6	4		Desmoplakin	P15924	3	5
	Protein phosphatase 1G OS=Homo sapiens GN=PPM1G PE=1 SV=1	O15355	2	4		tRNA-splicing endonuclease subunit Sen54 (Fragment)	J3KRC5		5
	Protein PRRC2A OS=Homo sapiens GN=PRRC2A PE=1 SV=3	P48634	7	4		Cyclin-dependent kinase 9	P50750	4	5
	Protein unc-80 homolog OS=Homo sapiens GN=UNC80 PE=2 SV=2	Q8N2C7	1	4		Erlin-2 (Fragment)	E5RHW4	4	5
	Torsin-1A-interacting protein 1 OS=Homo sapiens GN=TOR1AIP1 PE=1 SV=2	Q5JTV8		4		Serine/threonine-protein phosphatase 6 regulatory ankyrin repeat subunit A	O15084	1	5
	Prolyl 4-hydroxylase subunit alpha-2 OS=Homo sapiens GN=P4HA2 PE=1 SV=1	O15460		4		ESF1 homolog	Q9H501	2	5
	Rho guanine nucleotide exchange factor 2 OS=Homo sapiens GN=ARHGEF2 PE=1 SV=4	Q92974	5	4		Helicase SRCAP	A0A0A0MS59	1	5
	Probable ATP-dependent RNA helicase DDX41 OS=Homo sapiens GN=DDX41 PE=1 SV=2	Q9UJV9	2	4		SRSF protein kinase 2	P78362	4	5
	Structural maintenance of chromosomes protein 3 OS=Homo sapiens GN=SMC3 PE=1 SV=2	Q9UQE7	3	4		Chromodomain-helicase-DNA-binding protein 1	O14646	1	5
	Uncharacterized protein C1orf167 OS=Homo sapiens GN=C1orf167 PE=2 SV=2	Q5SNV9	2	4		RNA-binding protein Musashi homolog 2 (Fragment)	J3KTC1	1	5
	Uncharacterized protein C19orf43 OS=Homo sapiens GN=C19orf43 PE=1 SV=1	Q9BQ61	1	4		Aminoacyl tRNA synthase complex-interacting multifunctional protein 1	Q12904	3	5
	Probable E3 ubiquitin-protein ligase HERC1 OS=Homo sapiens GN=HERC1 PE=1 SV=2	Q15751	1	4		Mortality factor 4-like protein 1	H0YLJ3	3	5
	Replication protein A 70 kDa DNA-binding subunit OS=Homo sapiens GN=RPA1 PE=1 SV=2	P27694	1	4		ATP-binding cassette sub-family F member 2	Q9UG63	3	5
	Protein timeless homolog OS=Homo sapiens GN=TIMELESS PE=1 SV=2	Q9UNS1		4		Ran-binding protein 10	A0A0D9SEU5	2	5
	Suppressor of cytokine signaling 7 OS=Homo sapiens GN=SOCS7 PE=1 SV=2	O14512	4	4		Cullin-3	Q13618		5
	Proliferating cell nuclear antigen OS=Homo sapiens GN=PCNA PE=1 SV=1	P12004	2	4		Methylosome protein 50 (Fragment)	H0Y711		5
	Tumor suppressor p53-binding protein 1 OS=Homo sapiens GN=TP53BP1 PE=1 SV=2	Q12888	2	4		Probable ATP-dependent RNA helicase DDX56 (Fragment)	H7C3E9		5
	Ubiquitin-like modifier-activating enzyme 1 OS=Homo sapiens GN=UBA1 PE=1 SV=3	P22314		4		Golgin subfamily A member 3	Q08378	2	5
	Rho guanine nucleotide exchange factor 9 OS=Homo sapiens GN=ARHGEF9 PE=1 SV=3	O43307	3	4		DNA excision repair protein ERCC-6-like	Q2NKX8		5
	Prospero homeobox protein 1 OS=Homo sapiens GN=PROX1 PE=1 SV=2	Q92786	3	4		Transitional endoplasmic reticulum ATPase	P55072	8	5
	Prostaglandin E synthase 2 OS=Homo sapiens GN=PTGES2 PE=1 SV=1	Q9H7Z7	2	4		SWI/SNF-related matrix-associated actin-dependent regulator of chromatin subfamily A containing DEAD/H box 1	Q9H4L7		5
	Ras-related protein Rab-1A OS=Homo sapiens GN=RAB1A PE=1 SV=3	P62820	3	4		Replication factor C subunit 2	P35250	2	5
	Ras-related protein Rab-18 OS=Homo sapiens GN=RAB18 PE=1 SV=1	Q9NP72	4	4		Ubiquitin-like modifier-activating enzyme 1	P22314	10	5
	Talin-1 OS=Homo sapiens GN=TLN1 PE=1 SV=3	Q9Y490	6	4		60S ribosomal protein L8 (Fragment)	E9PKZ0	4	5
	Protein argonaute-2 OS=Homo sapiens GN=EIF2C2 PE=1 SV=3	Q9UKV8	4	4		Protein phosphatase 1G	O15355		5
	Protein CASC3 OS=Homo sapiens GN=CASC3 PE=1 SV=2	O15234		4		Coatomer subunit beta'	P35606	1	5
	TAR DNA-binding protein 43 OS=Homo sapiens GN=TARDBP PE=1 SV=1	Q13148	4	4		Tubulin alpha-1C chain	Q9BQE3	1	5
	Tyrosine-protein kinase Fyn OS=Homo sapiens GN=FYN PE=1 SV=3	P06241		4		Enhancer of mRNA-decapping protein 4	Q6P2E9		5
	Ras GTPase-activating-like protein IQGAP1 OS=Homo sapiens GN=IQGAP1 PE=1 SV=1	P46940	6	4		SUN domain-containing protein 2	Q9UH99	3	5
	Receptor tyrosine-protein kinase erbB-4 OS=Homo sapiens GN=ERBB4 PE=1 SV=1	Q15303	3	4		DNA (cytosine-5)-methyltransferase 1	P26358		5
	Nuclear RNA export factor 2 OS=Homo sapiens GN=NXF2 PE=1 SV=1	Q9GZY0	4	4		UDP-N-acetylglucosamine--peptide N-acetylglucosaminyltransferase 110 kDa subunit	O15294	7	5
	Zinc finger protein 629 OS=Homo sapiens GN=ZNF629 PE=2 SV=2	Q9UEG4		4		Death-inducer obliterator 1	Q9BTC0	2	4
	Zinc finger protein 598 OS=Homo sapiens GN=ZNF598 PE=1 SV=1	Q86UK7		4		General transcription factor 3C polypeptide 2	Q8WUA4		4
	Zinc finger CCHC domain-containing protein 7 OS=Homo sapiens GN=ZCCHC7 PE=1 SV=2	Q8N3Z6	1	4		Protein flightless-1 homolog	Q13045		4
	Olfactory receptor 4C46 OS=Homo sapiens GN=OR4C46 PE=2 SV=1	A6NHA9		4		Sodium/potassium-transporting ATPase subunit alpha-1	P05023		4
	Nuclear migration protein nudC OS=Homo sapiens GN=NUDC PE=1 SV=1	Q9Y266	5	4		Serine/threonine-protein phosphatase 4 regulatory subunit 3A	G3V5Z3		4
	Neuronal membrane glycoprotein M6-b OS=Homo sapiens GN=GPM6B PE=1 SV=2	Q13491	4	4		Coiled-coil domain-containing protein 86	Q9H6F5	2	4
	Zinc finger and BTB domain-containing protein 38 OS=Homo sapiens GN=ZBTB38 PE=1 SV=2	Q8NAP3	6	4		Merlin	P35240	3	4
	Nuclear receptor subfamily 1 group D member 1 OS=Homo sapiens GN=NR1D1 PE=1 SV=1	P20393	1	4		Protein FAM84A	Q96KN4	1	4
	Zinc finger protein 236 OS=Homo sapiens GN=ZNF236 PE=2 SV=2	Q9UL36	7	4		Pre-mRNA-processing factor 17	Q5SRN1	5	4
	Zinc finger and BTB domain-containing protein 10 OS=Homo sapiens GN=ZBTB10 PE=1 SV=2	Q96DT7	2	4		Four and a half LIM domains protein 3	Q13643		4
	Nesprin-2 OS=Homo sapiens GN=SYNE2 PE=1 SV=3	Q8WXH0	2	4		26S protease regulatory subunit 10B	P62333	4	4
	Myc box-dependent-interacting protein 1 OS=Homo sapiens GN=BIN1 PE=1 SV=1	O00499	1	3		DNA topoisomerase 1	P11387	2	4
	Collagen alpha-1(V) chain OS=Homo sapiens GN=COL5A1 PE=1 SV=3	P20908	4	3		Unconventional myosin-Ib	E9PDF6		4
	Leucine--tRNA ligase, cytoplasmic OS=Homo sapiens GN=LARS PE=1 SV=2	Q9P2J5	3	3		tRNA (cytosine(34)-C(5))-methyltransferase	Q08J23	6	4
	Multiple epidermal growth factor-like domains protein 8 OS=Homo sapiens GN=MEGF8 PE=1 SV=2	Q7Z7M0	1	3		Importin-4	Q8TEX9		4
	Beta-2 adrenergic receptor OS=Homo sapiens GN=ADRB2 PE=1 SV=3	P07550		3		Coatomer subunit gamma-2	Q9UBF2	1	4
	Extended synaptotagmin-1 OS=Homo sapiens GN=ESYT1 PE=1 SV=1	Q9BSJ8	1	3		Arginine and glutamate-rich protein 1	X6R9F1		4
	Immunoglobulin-like and fibronectin type III domain-containing protein 1 OS=Homo sapiens GN=IGFN1 PE=4 SV=1	F8WAI1	8	3		Cytoskeleton-associated protein 2	Q8WWK9	3	4
	ATP-dependent RNA helicase DDX39A OS=Homo sapiens GN=DDX39A PE=1 SV=2	O00148	3	3		Probable ATP-dependent RNA helicase DHX40	Q8IX18	4	4
	Cdc42 effector protein 1 OS=Homo sapiens GN=CDC42EP1 PE=1 SV=1	Q00587	3	3		Zinc finger CCCH domain-containing protein 14	G3V5I6		4
	Cation channel sperm-associated protein subunit beta OS=Homo sapiens GN=CATSPERB PE=1 SV=2	Q9H7T0	3	3		ATP-dependent 6-phosphofructokinase, platelet type	Q01813		4
	E1A-binding protein p400 OS=Homo sapiens GN=EP400 PE=1 SV=4	Q96L91	1	3		Centrosomal protein of 295 kDa	Q9C0D2	1	4
	60S ribosomal protein L9 OS=Homo sapiens GN=RPL9 PE=1 SV=1	P32969		3		Ribosome-binding protein 1	F8W7S5	2	4
	Adipocyte plasma membrane-associated protein OS=Homo sapiens GN=APMAP PE=1 SV=2	Q9HDC9	3	3		Junction plakoglobin	P14923		4
	Cathepsin H light chain OS=Homo sapiens GN=CTSH PE=4 SV=1	E9PN60	3	3		Phosphatidylinositol 4-kinase alpha	P42356	5	4
	60S ribosomal protein L6 OS=Homo sapiens GN=RPL6 PE=1 SV=3	Q02878	4	3		ATP-dependent DNA helicase Q1	P46063	4	4
	Calcium-activated potassium channel subunit alpha-1 OS=Homo sapiens GN=KCNMA1 PE=1 SV=2	Q12791		3		YTH domain-containing family protein 2	A0A087WXZ3	4	4
	Disks large homolog 1 OS=Homo sapiens GN=DLG1 PE=1 SV=2	Q12959	1	3		Eukaryotic translation initiation factor 2-alpha kinase 3 (Fragment)	C9J185	2	4
	FH2 domain-containing protein 1 OS=Homo sapiens GN=FHDC1 PE=2 SV=2	Q9C0D6	1	3		Cullin-associated NEDD8-dissociated protein 2	O75155		4
	Katanin p60 ATPase-containing subunit A-like 2 OS=Homo sapiens GN=KATNAL2 PE=2 SV=3	Q8IYT4	2	3		Zinc finger CCCH domain-containing protein 15	Q8WU90	3	4
	mRNA-decapping enzyme 1B OS=Homo sapiens GN=DCP1B PE=1 SV=2	Q8IZD4	2	3		40S ribosomal protein S9	P46781		4
	DnaJ homolog subfamily A member 1 OS=Homo sapiens GN=DNAJA1 PE=1 SV=2	P31689	2	3		Isocitrate dehydrogenase [NAD] subunit, mitochondrial	A0A087X2E5		4
	Long-chain-fatty-acid--CoA ligase 3 OS=Homo sapiens GN=ACSL3 PE=1 SV=3	O95573		3		Ubiquitin carboxyl-terminal hydrolase 10	Q14694		4
	Heterogeneous nuclear ribonucleoprotein U-like protein 2 OS=Homo sapiens GN=HNRNPUL2 PE=1 SV=1	Q1KMD3		3		Monofunctional C1-tetrahydrofolate synthase, mitochondrial	A0A087WVM4	7	4
	Eukaryotic translation initiation factor 5B OS=Homo sapiens GN=EIF5B PE=1 SV=4	O60841	3	3		AT-rich interactive domain-containing protein 4B	Q4LE39		4
	Brain-specific angiogenesis inhibitor 2 OS=Homo sapiens GN=BAI2 PE=2 SV=2	O60241	1	3		LIM domain only protein 7	E9PMS6	9	4
	Glycine dehydrogenase [decarboxylating], mitochondrial OS=Homo sapiens GN=GLDC PE=1 SV=2	P23378		3		Putative RNA-binding protein 15B	Q8NDT2	7	4
	Actin-related protein 2/3 complex subunit 1B OS=Homo sapiens GN=ARPC1B PE=1 SV=3	O15143	1	3		Golgi autoantigen, golgin subfamily a, 2, isoform CRA_a	A0A0C4DGS5	1	4
	DNA-binding protein A OS=Homo sapiens GN=CSDA PE=1 SV=4	P16989	5	3		Glutamine--tRNA ligase	P47897	10	4
	Arf-GAP with GTPase, ANK repeat and PH domain-containing protein 2 OS=Homo sapiens GN=AGAP2 PE=1 SV=2	Q99490	2	3		Glycogen [starch] synthase, muscle	P13807	1	4
	Histone-lysine N-methyltransferase EHMT2 OS=Homo sapiens GN=EHMT2 PE=1 SV=3	Q96KQ7		3		Baculoviral IAP repeat-containing protein 6	Q9NR09	1	4
	Baculoviral IAP repeat-containing protein 6 OS=Homo sapiens GN=BIRC6 PE=1 SV=2	Q9NR09	2	3		Cirhin	Q969X6		4
	Hypermethylated in cancer 1 protein OS=Homo sapiens GN=HIC1 PE=1 SV=5	Q14526	1	3		E2/E3 hybrid ubiquitin-protein ligase UBE2O	Q9C0C9		4
	E3 ubiquitin-protein ligase UBR5 OS=Homo sapiens GN=UBR5 PE=1 SV=2	O95071		3		Microtubule-actin cross-linking factor 1, isoforms 1/2/3/5 (Fragment)	H0Y390		4
	Actin-related protein 2/3 complex subunit 3 OS=Homo sapiens GN=ARPC3 PE=1 SV=3	O15145	1	3		Actin, cytoplasmic 1	P60709	6	4
	KDEL motif-containing protein 2 OS=Homo sapiens GN=KDELC2 PE=1 SV=2	Q7Z4H8		3		Nuclear pore membrane glycoprotein 210	Q8TEM1	2	4
	Exocyst complex component 6B OS=Homo sapiens GN=EXOC6B PE=1 SV=3	Q9Y2D4		3		Chromodomain-helicase-DNA-binding protein 8	Q9HCK8	1	4
	Lipid phosphate phosphatase-related protein type 3 OS=Homo sapiens GN=LPPR3 PE=2 SV=1	Q6T4P5	2	3		Nuclear autoantigenic sperm protein	P49321	4	4
	DEP domain-containing protein 5 OS=Homo sapiens GN=DEPDC5 PE=2 SV=1	O75140		3		Msx2-interacting protein	Q96T58	5	4
	APC membrane recruitment protein 1 OS=Homo sapiens GN=FAM123B PE=1 SV=2	Q5JTC6	2	3		Multiple myeloma tumor-associated protein 2	Q9BU76	1	4
	28S ribosomal protein S25, mitochondrial OS=Homo sapiens GN=MRPS25 PE=1 SV=1	P82663	2	3		Replication factor C subunit 5	P40937	1	4
	Collagen alpha-1(XXVIII) chain OS=Homo sapiens GN=COL28A1 PE=2 SV=2	Q2UY09	1	3		RRP15-like protein	Q9Y3B9		4
	HEAT repeat-containing protein 7B2 OS=Homo sapiens GN=HEATR7B2 PE=2 SV=3	Q7Z745		3		S1 RNA-binding domain-containing protein 1	Q8N5C6		4
	Armadillo repeat protein deleted in velo-cardio-facial syndrome OS=Homo sapiens GN=ARVCF PE=1 SV=1	O00192	3	3		WD repeat-containing protein 75	Q8IWA0	1	4
	Lipopolysaccharide-responsive and beige-like anchor protein OS=Homo sapiens GN=LRBA PE=1 SV=4	P50851	1	3		Sororin	Q96FF9	1	4
	Cyclin-T1 OS=Homo sapiens GN=CCNT1 PE=1 SV=1	O60563	1	3		Drebrin	Q16643	6	4
	Cell division cycle 5-like protein OS=Homo sapiens GN=CDC5L PE=1 SV=2	Q99459	3	3		HCG2033702, isoform CRA_a	A8MV53		4
	Endophilin-A3 OS=Homo sapiens GN=SH3GL3 PE=1 SV=1	Q99963	1	3		Rho guanine nucleotide exchange factor 10 (Fragment)	H0YAN8		4
	Coiled-coil-helix-coiled-coil-helix domain-containing protein 2, mitochondrial OS=Homo sapiens GN=CHCHD2 PE=1 SV=1	Q9Y6H1		3		mRNA export factor	P78406	3	4
	Mucin-12 OS=Homo sapiens GN=MUC12 PE=1 SV=2	Q9UKN1		3		Pre-mRNA-splicing factor CWC22 homolog (Fragment)	B7WP74	2	4
	60S ribosomal protein L19 OS=Homo sapiens GN=RPL19 PE=1 SV=1	P84098	7	3		Selenocysteine-specific elongation factor	P57772	1	4
	Glycine--tRNA ligase OS=Homo sapiens GN=GARS PE=1 SV=3	P41250	6	3		Alpha-ketoglutarate-dependent dioxygenase FTO	Q9C0B1		4
	CDKN2A-interacting protein OS=Homo sapiens GN=CDKN2AIP PE=1 SV=3	Q9NXV6	1	3		40S ribosomal protein S24	E7ETK0	3	4
	Myosin-11 OS=Homo sapiens GN=MYH11 PE=1 SV=3	P35749	6	3		Protocadherin-17 (Fragment)	A0A087WXV2	2	4
	Carbohydrate sulfotransferase 11 OS=Homo sapiens GN=CHST11 PE=1 SV=1	Q9NPF2	1	3		Zinc finger protein 346	Q9UL40		4
	Laminin subunit gamma-2 OS=Homo sapiens GN=LAMC2 PE=1 SV=2	Q13753	2	3		Delta-1-pyrroline-5-carboxylate synthase	P54886	3	4
	DNA repair protein XRCC1 OS=Homo sapiens GN=XRCC1 PE=1 SV=2	P18887		3		Nucleosome assembly protein 1-like 1 (Fragment)	H0YH88		4
	1-phosphatidylinositol 4,5-bisphosphate phosphodiesterase delta-1 OS=Homo sapiens GN=PLCD1 PE=1 SV=2	P51178	10	3		U3 small nucleolar RNA-associated protein 6 homolog	Q9NYH9	5	4
	Cullin-7 OS=Homo sapiens GN=CUL7 PE=1 SV=2	Q14999		3		Protein PRRC2B	Q5JSZ5	1	4
	1-phosphatidylinositol 4,5-bisphosphate phosphodiesterase epsilon-1 OS=Homo sapiens GN=PLCE1 PE=1 SV=3	Q9P212	2	3		Protein SCAF11	F8VXG7		4
	Carbamoyl-phosphate synthase [ammonia], mitochondrial OS=Homo sapiens GN=CPS1 PE=1 SV=2	P31327	4	3		Unhealthy ribosome biogenesis protein 2 homolog	Q14146	4	4
	H/ACA ribonucleoprotein complex subunit 4 OS=Homo sapiens GN=DKC1 PE=1 SV=3	O60832	1	3		Protein odr-4 homolog	Q5SWX8		4
	DNA polymerase kappa OS=Homo sapiens GN=POLK PE=1 SV=1	Q9UBT6		3		ATP-dependent RNA helicase DDX55	F5H5U2	2	4
	Ig kappa chain V-I region CAR OS=Homo sapiens PE=1 SV=1	P01596	4	3		Cullin-1	A0A0C4DGX4	3	4
	Lateral signaling target protein 2 homolog OS=Homo sapiens GN=ZFYVE28 PE=1 SV=3	Q9HCC9		3		Nucleolar MIF4G domain-containing protein 1	Q5C9Z4	1	4
	C-X-C chemokine receptor type 3 OS=Homo sapiens GN=CXCR3 PE=1 SV=2	P49682		3		Centrosomal protein of 78 kDa	Q5JTW2	2	4
	Hairy/enhancer-of-split related with YRPW motif protein 2 OS=Homo sapiens GN=HEY2 PE=1 SV=1	Q9UBP5		3		Nucleosome-remodeling factor subunit BPTF (Fragment)	F5GXF5		4
	Dynein heavy chain 3, axonemal OS=Homo sapiens GN=DNAH3 PE=2 SV=1	Q8TD57	2	3		Cullin 4B, isoform CRA_e	K4DI93	2	4
	Asparagine synthetase domain-containing protein 1 OS=Homo sapiens GN=ASNSD1 PE=2 SV=2	Q9NWL6	1	3		Protein lin-28 homolog B	Q6ZN17	1	4
	Leucine-rich repeat-containing protein 47 OS=Homo sapiens GN=LRRC47 PE=1 SV=1	Q8N1G4	1	3		Zinc finger CCCH domain-containing protein 4 (Fragment)	M0QY97	1	4
	Contactin-1 OS=Homo sapiens GN=CNTN1 PE=1 SV=1	Q12860	1	3		Transcriptional regulator ATRX	P46100		4
	Disco-interacting protein 2 homolog C OS=Homo sapiens GN=DIP2C PE=2 SV=2	Q9Y2E4	2	3		Centrosomal protein of 57 kDa (Fragment)	H0YFT8		4
	Calpain-12 OS=Homo sapiens GN=CAPN12 PE=2 SV=1	Q6ZSI9	3	3		THO complex subunit 2	A0A0C4DG98	10	3
	Glutamate receptor-interacting protein 2 OS=Homo sapiens GN=GRIP2 PE=1 SV=3	Q9C0E4	2	3		Terminal uridylyltransferase 7	Q5VYS8	2	3
	Ankyrin repeat and KH domain-containing protein 1 OS=Homo sapiens GN=ANKHD1 PE=1 SV=1	Q8IWZ3	3	3		Nucleoporin SEH1 (Fragment)	K7ENI5		3
	Calpain-9 OS=Homo sapiens GN=CAPN9 PE=1 SV=1	O14815	4	3		L-lactate dehydrogenase B chain	P07195		3
	Nebulin-related-anchoring protein OS=Homo sapiens GN=NRAP PE=2 SV=2	Q86VF7	3	3		Neutral alpha-glucosidase AB	F5H6X6	2	3
	Kynurenine--oxoglutarate transaminase 1 OS=Homo sapiens GN=CCBL1 PE=1 SV=1	Q16773	2	3		ATP-binding cassette sub-family D member 3	P28288		3
	Laminin subunit beta-2 OS=Homo sapiens GN=LAMB2 PE=1 SV=2	P55268	2	3		GTP-binding protein 1	O00178	4	3
	Corticotropin-releasing factor receptor 1 OS=Homo sapiens GN=CRHR1 PE=1 SV=1	P34998		3		Hepatoma-derived growth factor-related protein 2	Q7Z4V5		3
	Cullin-4A OS=Homo sapiens GN=CUL4A PE=1 SV=3	Q13619	2	3		Calpain-1 catalytic subunit	P07384		3
	NCK-interacting protein with SH3 domain OS=Homo sapiens GN=NCKIPSD PE=1 SV=1	Q9NZQ3	3	3		39S ribosomal protein L44, mitochondrial	Q9H9J2		3
	Calponin-3 OS=Homo sapiens GN=CNN3 PE=1 SV=1	Q15417	2	3		Lipopolysaccharide-responsive and beige-like anchor protein	E9PEM5		3
	Glutamine-dependent NAD(+) synthetase OS=Homo sapiens GN=NADSYN1 PE=1 SV=3	Q6IA69	3	3		Far upstream element-binding protein 3	Q96I24	4	3
	Coronin-1A OS=Homo sapiens GN=CORO1A PE=1 SV=4	P31146		3		Importin subunit alpha-4	O00505		3
	DNA repair protein RAD50 OS=Homo sapiens GN=RAD50 PE=1 SV=1	Q92878	4	3		General transcription factor 3C polypeptide 5	Q5T7U1	1	3
	Far upstream element-binding protein 1 OS=Homo sapiens GN=FUBP1 PE=1 SV=3	Q96AE4	5	3		PAX3- and PAX7-binding protein 1	Q9Y5B6	5	3
	Gliomedin (Fragment) OS=Homo sapiens GN=GLDN PE=4 SV=1	H0YM22	2	3		Zinc finger protein 512	G3XAG1	1	3
	Kinesin-like protein KIFC1 OS=Homo sapiens GN=KIFC1 PE=1 SV=2	Q9BW19	1	3		Very-long-chain (3R)-3-hydroxyacyl-CoA dehydratase 3	H3BPZ1		3
	Catalase OS=Homo sapiens GN=CAT PE=1 SV=3	P04040		3		ATP-dependent RNA helicase DDX42	A0A0A0MSJ0	1	3
	Ankyrin repeat domain-containing protein 13A OS=Homo sapiens GN=ANKRD13A PE=1 SV=3	Q8IZ07		3		Polymerase delta-interacting protein 2	B4DEM9	1	3
	Immunity-related GTPase family Q protein OS=Homo sapiens GN=IRGQ PE=1 SV=1	Q8WZA9		3		Kinesin-like protein	A0A0C4DGP2		3
	Kinesin heavy chain isoform 5A OS=Homo sapiens GN=KIF5A PE=1 SV=2	Q12840	3	3		Kinesin-like protein	H3BRB3	2	3
	Collagen alpha-6(IV) chain OS=Homo sapiens GN=COL4A6 PE=2 SV=3	Q14031	3	3		Cell division control protein 45 homolog	O75419		3
	Kinase suppressor of Ras 1 OS=Homo sapiens GN=KSR1 PE=1 SV=2	Q8IVT5		3		Choline-phosphate cytidylyltransferase A	P49585		3
	Bloom syndrome protein OS=Homo sapiens GN=BLM PE=1 SV=1	P54132	1	3		Zinc finger protein 292 (Fragment)	E5RFE6	5	3
	Heterogeneous nuclear ribonucleoprotein A/B OS=Homo sapiens GN=HNRNPAB PE=1 SV=2	Q99729	3	3		Methylcytosine dioxygenase TET2	Q6N021	3	3
	26S proteasome non-ATPase regulatory subunit 11 OS=Homo sapiens GN=PSMD11 PE=1 SV=3	O00231	3	3		Glyceraldehyde-3-phosphate dehydrogenase	P04406		3
	26S protease regulatory subunit 6A OS=Homo sapiens GN=PSMC3 PE=1 SV=3	P17980	3	3		Nuclear pore complex protein Nup214	A0A0A0MSW3		3
	Collagen alpha-2(XI) chain OS=Homo sapiens GN=COL11A2 PE=1 SV=5	P13942	2	3		26S proteasome non-ATPase regulatory subunit 7	P51665		3
	KH domain-containing, RNA-binding, signal transduction-associated protein 1 OS=Homo sapiens GN=KHDRBS1 PE=1 SV=1	Q07666	3	3		Nuclear pore complex protein Nup85 (Fragment)	J3QS63	1	3
	Collagen alpha-2(VI) chain OS=Homo sapiens GN=COL6A2 PE=1 SV=4	P12110	3	3		Glioma tumor suppressor candidate region gene 2 protein	Q9NZM5	1	3
	Leucine-rich repeat-containing protein 66 OS=Homo sapiens GN=LRRC66 PE=2 SV=1	Q68CR7	1	3		Centrosomal protein of 170 kDa	Q5SW79		3
	Collagen alpha-2(IX) chain OS=Homo sapiens GN=COL9A2 PE=1 SV=2	Q14055	1	3		PERQ amino acid-rich with GYF domain-containing protein 2 (Fragment)	E7ESB6		3
	Collagen alpha-2(IV) chain OS=Homo sapiens GN=COL4A2 PE=1 SV=4	P08572	1	3		Phosducin-like protein	Q13371		3
	Hydroxymethylglutaryl-CoA synthase, mitochondrial OS=Homo sapiens GN=HMGCS2 PE=1 SV=1	P54868	1	3		Phenylalanine--tRNA ligase beta subunit	Q9NSD9	2	3
	Ectonucleotide pyrophosphatase/phosphodiesterase family member 1 OS=Homo sapiens GN=ENPP1 PE=1 SV=2	P22413	1	3		Histone-lysine N-methyltransferase SETD1A	O15047		3
	Complexin-2 OS=Homo sapiens GN=CPLX2 PE=1 SV=2	Q6PUV4	1	3		PHD finger protein 3	Q92576		3
	Heterogeneous nuclear ribonucleoprotein A0 OS=Homo sapiens GN=HNRNPA0 PE=1 SV=1	Q13151	3	3		Zinc finger protein 318	Q5VUA4	1	3
	A disintegrin and metalloproteinase with thrombospondin motifs 2 OS=Homo sapiens GN=ADAMTS2 PE=2 SV=2	O95450		3		Tetratricopeptide repeat protein 28	A0A087WW06	1	3
	A disintegrin and metalloproteinase with thrombospondin motifs 19 OS=Homo sapiens GN=ADAMTS19 PE=1 SV=2	Q8TE59	3	3		Nuclear pore complex protein Nup98-Nup96 (Fragment)	H7C3P6		3
	Dihydrolipoyllysine-residue acetyltransferase component of pyruvate dehydrogenase complex, mitochondrial OS=Homo sapiens GN=DLAT PE=1 SV=3	P10515	4	3		28S ribosomal protein S27, mitochondrial (Fragment)	D6RH20	1	3
	Elongation factor 1-gamma OS=Homo sapiens GN=EEF1G PE=1 SV=3	P26641	6	3		Kinesin-1 heavy chain	P33176	7	3
	Embryonic polyadenylate-binding protein 2 OS=Homo sapiens GN=PABPN1L PE=2 SV=1	A6NDY0	4	3		LINE-1 retrotransposable element ORF1 protein	Q9UN81	3	3
	Diffuse panbronchiolitis critical region protein 1 OS=Homo sapiens GN=DPCR1 PE=4 SV=1	E9PEI6	1	3		MMS19 nucleotide excision repair protein homolog	F8WCH8	3	3
	26S protease regulatory subunit 6B OS=Homo sapiens GN=PSMC4 PE=1 SV=2	P43686	3	3		39S ribosomal protein L39, mitochondrial (Fragment)	C9JG87	1	3
	Caseinolytic peptidase B protein homolog OS=Homo sapiens GN=CLPB PE=1 SV=1	Q9H078	1	3		Histone-lysine N-methyltransferase EHMT2	Q96KQ7		3
	Dynein heavy chain 9, axonemal OS=Homo sapiens GN=DNAH9 PE=1 SV=3	Q9NYC9	3	3		Calcium-binding mitochondrial carrier protein Aralar1	O75746		3
	DOMON domain-containing protein FRRS1L OS=Homo sapiens GN=FRRS1L PE=2 SV=2	Q9P0K9		3		Valine--tRNA ligase	P26640	1	3
	26S protease regulatory subunit 10B OS=Homo sapiens GN=PSMC6 PE=1 SV=1	P62333	6	3		Calcium-binding mitochondrial carrier protein Aralar2	Q9UJS0		3
	BCL-6 corepressor-like protein 1 OS=Homo sapiens GN=BCORL1 PE=1 SV=1	Q5H9F3		3		Lethal(3)malignant brain tumor-like protein 2	Q969R5		3
	Acid-sensing ion channel 4 OS=Homo sapiens GN=ASIC4 PE=1 SV=2	Q96FT7	2	3		Periodic tryptophan protein 1 homolog	B4DJV5		3
	BAG family molecular chaperone regulator 3 OS=Homo sapiens GN=BAG3 PE=1 SV=3	O95817	3	3		Centromere protein C	Q03188		3
	Apolipoprotein B-100 OS=Homo sapiens GN=APOB PE=1 SV=2	P04114	1	3		Nuclear export mediator factor NEMF (Fragment)	G3V5V3	1	3
	Histone H1x OS=Homo sapiens GN=H1FX PE=1 SV=1	Q92522	6	3		Nuclear fragile X mental retardation-interacting protein 2	Q7Z417	3	3
	Cytoplasmic dynein 2 heavy chain 1 OS=Homo sapiens GN=DYNC2H1 PE=1 SV=4	Q8NCM8		3		Nucleolar protein 9	Q86U38	1	3
	Coatomer subunit gamma-1 OS=Homo sapiens GN=COPG1 PE=1 SV=1	Q9Y678	1	3		Transformation/transcription domain-associated protein (Fragment)	H0Y4W2		3
	Mirror-image polydactyly gene 1 protein OS=Homo sapiens GN=MIPOL1 PE=2 SV=1	Q8TD10		3		Serine/threonine-protein phosphatase 1 regulatory subunit 10	Q96QC0		3
	Acyl-coenzyme A oxidase-like protein OS=Homo sapiens GN=ACOXL PE=2 SV=3	Q9NUZ1	3	3		RNA-binding protein 40 (Fragment)	X6RLP6	2	3
	Anaphase-promoting complex subunit 2 OS=Homo sapiens GN=ANAPC2 PE=1 SV=1	Q9UJX6		3		SLAIN motif-containing protein 2	D6RIF6		3
	Dynactin subunit 4 OS=Homo sapiens GN=DCTN4 PE=1 SV=1	Q9UJW0	1	3		Cysteine--tRNA ligase, cytoplasmic	B4DKY1	6	3
	E3 ubiquitin-protein ligase TRIM33 OS=Homo sapiens GN=TRIM33 PE=1 SV=3	Q9UPN9	2	3		DnaJ homolog subfamily C member 13	O75165	5	3
	Integrin-linked protein kinase OS=Homo sapiens GN=ILK PE=1 SV=2	Q13418	4	3		Protein arginine N-methyltransferase 1	E9PKG1	15	3
	Coiled-coil domain-containing protein 129 OS=Homo sapiens GN=CCDC129 PE=4 SV=1	F5H3V5	2	3		Sister chromatid cohesion protein PDS5 homolog B	Q9NTI5		3
	Golgi reassembly-stacking protein 1 (Fragment) OS=Homo sapiens GN=GORASP1 PE=4 SV=1	H7C0J2		3		Zinc finger protein with KRAB and SCAN domains 8	Q15776		3
	Golgi apparatus protein 1 OS=Homo sapiens GN=GLG1 PE=1 SV=2	Q92896	1	3		Zinc finger MYM-type protein 4 (Fragment)	H7C1I7		3
	Delta-1-pyrroline-5-carboxylate synthase OS=Homo sapiens GN=ALDH18A1 PE=1 SV=2	P54886	4	3		DNA-directed RNA polymerase I subunit RPA34	O15446	1	3
	GMP synthase [glutamine-hydrolyzing] OS=Homo sapiens GN=GMPS PE=1 SV=1	P49915	4	3		Spindle and centriole-associated protein 1	Q8N0Z3		3
	E3 ubiquitin-protein ligase DTX3L OS=Homo sapiens GN=DTX3L PE=1 SV=1	Q8TDB6		3		Proliferating cell nuclear antigen	P12004		3
	Cadherin-13 OS=Homo sapiens GN=CDH13 PE=1 SV=1	P55290		3		Programmed cell death 6-interacting protein	Q8WUM4	3	3
	Histone acetyltransferase type B catalytic subunit OS=Homo sapiens GN=HAT1 PE=1 SV=1	O14929	1	3		Ribosomal protein L15 (Fragment)	E7EX53		3
	40S ribosomal protein SA OS=Homo sapiens GN=RPSA PE=1 SV=4	P08865	2	3		Serine/threonine-protein phosphatase 2A 65 kDa regulatory subunit A alpha isoform	P30153		3
	Mini-chromosome maintenance complex-binding protein OS=Homo sapiens GN=MCMBP PE=1 SV=2	Q9BTE3	1	3		DNA-directed RNA polymerase	B9ZVN9		3
	Interleukin enhancer-binding factor 3 OS=Homo sapiens GN=ILF3 PE=1 SV=3	Q12906	4	3		Elongator complex protein 1	O95163		3
	Cleavage and polyadenylation specificity factor subunit 5 OS=Homo sapiens GN=NUDT21 PE=1 SV=1	O43809		3		26S proteasome non-ATPase regulatory subunit 13	J3KNQ3		3
	Melanoma-associated antigen D2 OS=Homo sapiens GN=MAGED2 PE=1 SV=2	Q9UNF1	1	3		2',3'-cyclic-nucleotide 3'-phosphodiesterase	P09543	1	3
	MARCKS-related protein OS=Homo sapiens GN=MARCKSL1 PE=1 SV=2	P49006	2	3		26S proteasome non-ATPase regulatory subunit 1	A0A087WW66	3	3
	ESF1 homolog OS=Homo sapiens GN=ESF1 PE=1 SV=1	Q9H501	1	3		Structural maintenance of chromosomes protein 6	Q96SB8	2	3
	Dedicator of cytokinesis protein 8 OS=Homo sapiens GN=DOCK8 PE=1 SV=3	Q8NF50		3		DNA-directed RNA polymerases I and III subunit RPAC1	E7EQB9		3
	Allograft inflammatory factor 1-like OS=Homo sapiens GN=C9orf58 PE=2 SV=1	Q5JUP1		3		Acyl-coenzyme A thioesterase 8	E9PJN0		3
	FRAS1-related extracellular matrix protein 3 OS=Homo sapiens GN=FREM3 PE=2 SV=2	P0C091		3		DnaJ homolog subfamily B member 2 (Fragment)	C9JRD2		3
	Histone deacetylase 7 OS=Homo sapiens GN=HDAC7 PE=4 SV=2	C9JKN3		3		Zinc finger ZZ-type and EF-hand domain-containing protein 1	O43149		3
	Histone deacetylase complex subunit SAP130 OS=Homo sapiens GN=SAP130 PE=1 SV=1	Q9H0E3		3		Ubiquitin carboxyl-terminal hydrolase 34	Q70CQ2		3
	Eukaryotic translation initiation factor 3 subunit A OS=Homo sapiens GN=EIF3A PE=1 SV=1	Q14152	5	3		4F2 cell-surface antigen heavy chain	F5GZS6		3
	Eukaryotic translation initiation factor 3 subunit F OS=Homo sapiens GN=EIF3F PE=1 SV=1	O00303	4	3		E3 ubiquitin-protein ligase TRIM41 (Fragment)	H0Y9T3		3
	G-rich sequence factor 1 OS=Homo sapiens GN=GRSF1 PE=1 SV=3	Q12849	1	3		Spermatogenesis-associated protein 5	Q8NB90	2	3
	Atrial natriuretic peptide-converting enzyme OS=Homo sapiens GN=CORIN PE=1 SV=2	Q9Y5Q5		3		Signal recognition particle subunit SRP72	O76094	1	3
	Eukaryotic translation initiation factor 3 subunit G OS=Homo sapiens GN=EIF3G PE=1 SV=2	O75821	2	3		Rho guanine nucleotide exchange factor 2	Q92974	1	3
	ATP-binding cassette sub-family F member 1 OS=Homo sapiens GN=ABCF1 PE=1 SV=2	Q8NE71	3	3		DnaJ homolog subfamily B member 12 (Fragment)	V9GYN7		3
	Erythropoietin OS=Homo sapiens GN=EPO PE=1 SV=1	P01588	2	3		60S ribosomal protein L34	P49207		3
	Insulin-like growth factor 2 mRNA-binding protein 2 OS=Homo sapiens GN=IGF2BP2 PE=1 SV=2	Q9Y6M1	4	3		Aspartyl/asparaginyl beta-hydroxylase	Q12797		3
	Eukaryotic translation initiation factor 3 subunit I OS=Homo sapiens GN=EIF3I PE=1 SV=1	Q13347	3	3		26S proteasome non-ATPase regulatory subunit 14	O00487	1	3
	Cleavage stimulation factor subunit 3 OS=Homo sapiens GN=CSTF3 PE=1 SV=1	Q12996	3	3		Protein ZNF767	Q75MW2	1	3
	E3 ubiquitin-protein ligase parkin OS=Homo sapiens GN=PARK2 PE=1 SV=2	O60260	2	3		Uncharacterized protein KIAA1671	Q9BY89		3
	Eukaryotic translation initiation factor 3 subunit E OS=Homo sapiens GN=EIF3E PE=1 SV=1	P60228	6	3		Constitutive coactivator of PPAR-gamma-like protein 1 (Fragment)	A0A0C4DH52		3
	FTS and Hook-interacting protein OS=Homo sapiens GN=FAM160A2 PE=1 SV=3	Q8N612		3		RNA polymerase-associated protein RTF1 homolog	Q92541	4	3
	DNA mismatch repair protein Msh6 OS=Homo sapiens GN=MSH6 PE=1 SV=2	P52701	1	3		E3 SUMO-protein ligase CBX4	O00257		3
	Clathrin heavy chain linker domain-containing protein 1 OS=Homo sapiens GN=CLHC1 PE=2 SV=3	Q8NHS4	1	3		DNA topoisomerase (Fragment)	H0Y6W0	4	3
	Forkhead box protein F2 OS=Homo sapiens GN=FOXF2 PE=1 SV=2	Q12947	1	3		Sentrin-specific protease 1	Q9P0U3		3
	Eukaryotic translation initiation factor 3 subunit L OS=Homo sapiens GN=EIF3L PE=1 SV=1	Q9Y262	5	3		Zinc finger CCHC domain-containing protein 8	Q6NZY4		3
	Coiled-coil domain-containing protein 22 OS=Homo sapiens GN=CCDC22 PE=1 SV=1	O60826		3		Acidic leucine-rich nuclear phosphoprotein 32 family member E (Fragment)	E9PPH5		3
	Adenomatous polyposis coli protein 2 OS=Homo sapiens GN=APC2 PE=1 SV=1	O95996	2	3		Cohesin subunit SA-2	Q8N3U4	1	3
	Chromosome-associated kinesin KIF4A OS=Homo sapiens GN=KIF4A PE=1 SV=3	O95239	6	3		Rab-like protein 6	Q3YEC7		3
	MKL/myocardin-like protein 2 OS=Homo sapiens GN=MKL2 PE=1 SV=3	Q9ULH7		3		Zinc finger CCCH-type antiviral protein 1-like	Q96H79	3	3
	Interferon regulatory factor 2-binding protein 2 OS=Homo sapiens GN=IRF2BP2 PE=1 SV=2	Q7Z5L9	3	3		Eukaryotic translation initiation factor 5B	A0A087WUT6	7	3
	DNA endonuclease RBBP8 OS=Homo sapiens GN=RBBP8 PE=1 SV=2	Q99708	4	3		Zinc finger protein 771	Q7L3S4		3
	Enhancer of polycomb homolog 2 OS=Homo sapiens GN=EPC2 PE=1 SV=2	Q52LR7		3		Pre-mRNA-splicing factor SYF1	Q9HCS7	11	3
	Mdm2-binding protein OS=Homo sapiens GN=MTBP PE=1 SV=1	Q96DY7		3		40S ribosomal protein S25	P62851		2
	Cadherin-4 OS=Homo sapiens GN=CDH4 PE=2 SV=2	P55283	1	3		Amyloid-like protein 2	Q06481		2
	Bromodomain and WD repeat-containing protein 1 OS=Homo sapiens GN=BRWD1 PE=1 SV=4	Q9NSI6	3	3		BCL-6 corepressor	Q6W2J9		2
	Cytospin-B OS=Homo sapiens GN=SPECC1 PE=1 SV=1	Q5M775	2	3		Chromatin assembly factor 1 subunit A	Q13111		2
	2-oxoisovalerate dehydrogenase subunit alpha, mitochondrial OS=Homo sapiens GN=BCKDHA PE=1 SV=2	P12694	2	3		Uncharacterized protein	A0A075B6Q4	2	2
	Cingulin-like protein 1 OS=Homo sapiens GN=CGNL1 PE=1 SV=2	Q0VF96	2	3		HAUS augmin-like complex subunit 6	Q5VY60		2
	Alpha-internexin OS=Homo sapiens GN=INA PE=1 SV=2	Q16352	2	3		Transcription elongation factor B (SIII), polypeptide 3 (110kDa, elongin A), isoform CRA_a	A0A024RAC6	2	2
	Bromodomain-containing protein 1 OS=Homo sapiens GN=BRD1 PE=2 SV=1	B4E3L9	1	3		Putative ribosome-binding factor A, mitochondrial	Q8N0V3	4	2
	HEAT repeat-containing protein 5B OS=Homo sapiens GN=HEATR5B PE=1 SV=2	Q9P2D3		3		HEAT repeat-containing protein 6	K7ELR8		2
	ERC protein 2 OS=Homo sapiens GN=ERC2 PE=1 SV=3	O15083		3		Tyrosine-protein phosphatase non-receptor type 13	Q12923	1	2
	Microtubule-associated protein 6 OS=Homo sapiens GN=MAP6 PE=1 SV=2	Q96JE9	1	3		Ubiquitin carboxyl-terminal hydrolase 36	Q9P275		2
	MAX gene-associated protein OS=Homo sapiens GN=MGA PE=1 SV=2	Q8IWI9	1	3		N-acetyltransferase ESCO2 (Fragment)	E5RFP7		2
	Eukaryotic translation initiation factor 3 subunit J OS=Homo sapiens GN=EIF3J PE=1 SV=2	O75822	2	3		RecQ-mediated genome instability protein 1 (Fragment)	A0A0A0MSU3		2
	5-azacytidine-induced protein 1 (Fragment) OS=Homo sapiens GN=AZI1 PE=4 SV=1	I3L4M5	2	3		60S ribosomal protein L36	Q9Y3U8		2
	Eukaryotic initiation factor 4A-III OS=Homo sapiens GN=EIF4A3 PE=1 SV=4	P38919	1	3		Rac GTPase-activating protein 1 (Fragment)	F8W1T4		2
	Cadherin-23 OS=Homo sapiens GN=CDH23 PE=1 SV=2	Q9H251	4	3		Alpha-taxilin	P40222	1	2
	Armadillo repeat-containing X-linked protein 4 OS=Homo sapiens GN=ARMCX4 PE=4 SV=2	F8W8Y7	1	3		Band 4.1-like protein 3	B2RB02		2
	Isocitrate dehydrogenase [NAD] subunit beta, mitochondrial OS=Homo sapiens GN=IDH3B PE=1 SV=2	O43837	4	3		Neurofilament medium polypeptide	E7EMV2	1	2
	ERI1 exoribonuclease 2 OS=Homo sapiens GN=ERI2 PE=2 SV=2	A8K979	1	3		Src substrate cortactin	Q14247	4	2
	40S ribosomal protein S19 OS=Homo sapiens GN=RPS19 PE=1 SV=2	P39019	2	3		Dual specificity mitogen-activated protein kinase kinase 3	P46734	3	2
	Annexin A4 OS=Homo sapiens GN=ANXA4 PE=1 SV=4	P09525	2	3		DNA polymerase delta subunit 3	Q15054		2
	Staphylococcal nuclease domain-containing protein 1 OS=Homo sapiens GN=SND1 PE=1 SV=1	Q7KZF4	3	3		5'-3' exoribonuclease 1 (Fragment)	H7C5E4	1	2
	Oxysterol-binding protein-related protein 11 OS=Homo sapiens GN=OSBPL11 PE=1 SV=2	Q9BXB4	3	3		Twinkle protein, mitochondrial	Q96RR1		2
	Protein arginine N-methyltransferase 5 OS=Homo sapiens GN=PRMT5 PE=1 SV=4	O14744	5	3		Nesprin-2	A0A0C4DGK3		2
	Splicing factor 3B subunit 4 OS=Homo sapiens GN=SF3B4 PE=1 SV=1	Q15427	3	3		Tetratricopeptide repeat protein 27	Q6P3X3		2
	Protein arginine N-methyltransferase 1 OS=Homo sapiens GN=PRMT1 PE=1 SV=2	Q99873	3	3		MAP kinase-activated protein kinase 2	P49137		2
	Vasohibin-1 OS=Homo sapiens GN=VASH1 PE=1 SV=1	Q7L8A9		3		N-glycosylase/DNA lyase (Fragment)	H7C0A1	5	2
	Protein unc-13 homolog B OS=Homo sapiens GN=UNC13B PE=1 SV=2	O14795	1	3		Kinesin-like protein KIF2C	Q99661	2	2
	Protein HIRA OS=Homo sapiens GN=HIRA PE=1 SV=2	P54198		3		Nestin	P48681		2
	Protein IMPACT OS=Homo sapiens GN=IMPACT PE=1 SV=2	Q9P2X3	1	3		Ninein (Fragment)	H0YDJ4		2
	SRC kinase-signaling inhibitor 1 (Fragment) OS=Homo sapiens GN=SRCIN1 PE=4 SV=1	J3KT41	2	3		Nipped-B-like protein	Q6KC79	2	2
	Transforming growth factor beta-1-induced transcript 1 protein OS=Homo sapiens GN=TGFB1I1 PE=1 SV=2	O43294		3		Cullin-3	A0A087WTG3	3	2
	Stromal cell-derived factor 2 OS=Homo sapiens GN=SDF2 PE=1 SV=2	Q99470	1	3		Death domain-associated protein 6	Q9UER7	1	2
	Stabilin-1 OS=Homo sapiens GN=STAB1 PE=1 SV=3	Q9NY15		3		DnaJ homolog subfamily C member 2	Q99543		2
	PHD and RING finger domain-containing protein 1 OS=Homo sapiens GN=PHRF1 PE=1 SV=3	Q9P1Y6	4	3		Tripartite motif-containing protein 3	O75382		2
	STE20-like serine/threonine-protein kinase OS=Homo sapiens GN=SLK PE=1 SV=1	Q9H2G2		3		Ubiquitin-associated protein 2-like (Fragment)	Q5VU81		2
	Vacuolar protein sorting-associated protein 53 homolog OS=Homo sapiens GN=VPS53 PE=1 SV=1	Q5VIR6	1	3		Ribosome-releasing factor 2, mitochondrial	Q969S9		2
	Rho GTPase-activating protein 29 OS=Homo sapiens GN=ARHGAP29 PE=1 SV=2	Q52LW3	1	3		Ubiquitin carboxyl-terminal hydrolase 37	Q86T82		2
	Protein Jumonji OS=Homo sapiens GN=JARID2 PE=1 SV=2	Q92833		3		Heme oxygenase 2	P30519		2
	Zinc finger CCCH domain-containing protein 10 OS=Homo sapiens GN=ZC3H10 PE=1 SV=1	Q96K80		3		Leucine-rich repeat flightless-interacting protein 1	Q32MZ4		2
	Tetratricopeptide repeat protein GNN OS=Homo sapiens GN=GNN PE=2 SV=3	Q6P2S7	1	3		Serine/arginine-rich-splicing factor 2 (Fragment)	J3QL05	4	2
	Potassium voltage-gated channel subfamily H member 7 OS=Homo sapiens GN=KCNH7 PE=1 SV=2	Q9NS40	1	3		BSD domain-containing protein 1	Q9NW68		2
	Protein transport protein Sec31A OS=Homo sapiens GN=SEC31A PE=1 SV=3	O94979	1	3		ZW10 interactor	A6NH27		2
	Putative PIP5K1A and PSMD4-like protein OS=Homo sapiens GN=PIPSL PE=5 SV=1	A2A3N6		3		BTB/POZ domain-containing protein KCTD12	Q96CX2	1	2
	Rho GTPase-activating protein 5 OS=Homo sapiens GN=ARHGAP5 PE=1 SV=2	Q13017	1	3		Ribosomal RNA processing protein 1 homolog A	P56182	1	2
	THO complex subunit 5 homolog OS=Homo sapiens GN=THOC5 PE=1 SV=2	Q13769		3		Microtubule-actin cross-linking factor 1, isoforms 1/2/3/5 (Fragment)	H0YD69	1	2
	Serine/threonine-protein phosphatase 2A 65 kDa regulatory subunit A alpha isoform OS=Homo sapiens GN=PPP2R1A PE=1 SV=4	P30153	1	3		Large subunit GTPase 1 homolog	Q9H089		2
	Nuclear factor of activated T-cells, cytoplasmic 4 OS=Homo sapiens GN=NFATC4 PE=1 SV=2	Q14934	2	3		UAP56-interacting factor	H9KVD1		2
	Sorting nexin-33 OS=Homo sapiens GN=SNX33 PE=1 SV=1	Q8WV41	5	3		MAP7 domain-containing protein 1	Q3KQU3		2
	Protein kinase C and casein kinase substrate in neurons protein 2 OS=Homo sapiens GN=PACSIN2 PE=1 SV=2	Q9UNF0	1	3		Lariat debranching enzyme	Q9UK59	3	2
	Serpin B10 OS=Homo sapiens GN=SERPINB10 PE=1 SV=1	P48595	1	3		Bromodomain adjacent to zinc finger domain protein 1A	Q9NRL2		2
	RalBP1-associated Eps domain-containing protein 1 (Fragment) OS=Homo sapiens GN=REPS1 PE=4 SV=1	H0YE73		3		Latent-transforming growth factor beta-binding protein 1	Q14766		2
	Olfactory receptor 51E2 OS=Homo sapiens GN=OR51E2 PE=2 SV=1	Q9H255		3		RNA binding motif protein, X-linked-like-1	Q96E39		2
	Nuclear fragile X mental retardation-interacting protein 2 OS=Homo sapiens GN=NUFIP2 PE=1 SV=1	Q7Z417	1	3		6-phosphofructo-2-kinase/fructose-2,6-bisphosphatase 3	F2Z2I2	3	2
	Serrate RNA effector molecule homolog OS=Homo sapiens GN=SRRT PE=1 SV=1	Q9BXP5	2	3		Histone acetyltransferase	A5PLL3	2	2
	Very long-chain specific acyl-CoA dehydrogenase, mitochondrial OS=Homo sapiens GN=ACADVL PE=1 SV=1	P49748	2	3		RNA/RNP complex-1-interacting phosphatase	O75319		2
	Protein FAM90A27P OS=Homo sapiens GN=FAM90A27P PE=3 SV=2	A6NNH2		3		Leucine-rich repeat and calponin homology domain-containing protein 2	Q5VUJ6	1	2
	Splicing factor 3B subunit 1 OS=Homo sapiens GN=SF3B1 PE=1 SV=3	O75533	12	3		RNA-binding protein 27	U3KPZ7	1	2
	Pescadillo homolog OS=Homo sapiens GN=PES1 PE=1 SV=1	O00541	1	3		Splicing factor 3A subunit 3	Q12874		2
	Protein flightless-1 homolog OS=Homo sapiens GN=FLII PE=1 SV=2	Q13045	2	3		RNA-binding protein 33	Q96EV2		2
	Protein FLJ23152 OS=Homo sapiens GN=FLJ23152 PE=4 SV=1	H3BQB6	3	3		Splicing factor 3A subunit 2	Q15428	6	2
	Probable phospholipid-transporting ATPase IH OS=Homo sapiens GN=ATP11A PE=1 SV=3	P98196	1	3		Mediator of RNA polymerase II transcription subunit 1	Q15648		2
	Sphingomyelin phosphodiesterase 3 OS=Homo sapiens GN=SMPD3 PE=1 SV=1	Q9NY59		3		YTH domain-containing protein 1	J3QR07		2
	Nuclear receptor corepressor 1 OS=Homo sapiens GN=NCOR1 PE=1 SV=2	O75376	3	3		Retinoic acid-induced protein 1 (Fragment)	A8MXE8	1	2
	Serotransferrin OS=Homo sapiens GN=TF PE=1 SV=3	P02787	2	3		Leucine-rich repeat-containing protein 59	Q96AG4		2
	Ubiquitin carboxyl-terminal hydrolase 19 OS=Homo sapiens GN=USP19 PE=1 SV=2	O94966	5	3		Pre-mRNA-splicing factor ISY1 homolog	Q9ULR0	6	2
	Splicing factor 3A subunit 3 OS=Homo sapiens GN=SF3A3 PE=1 SV=1	Q12874	1	3		A-kinase anchor protein 17A	X6RAJ1	1	2
	TRIO and F-actin-binding protein OS=Homo sapiens GN=TRIOBP PE=1 SV=3	Q9H2D6	4	3		Regulator of microtubule dynamics protein 3 (Fragment)	H0YMB1		2
	Uncharacterized protein C10orf47 OS=Homo sapiens GN=C10orf47 PE=1 SV=2	Q86WR7		3		Regulator of nonsense transcripts 1	Q92900		2
	NHS-like protein 2 OS=Homo sapiens GN=NHSL2 PE=2 SV=1	Q5HYW2	3	3		Regulator of nonsense transcripts 2	Q9HAU5	6	2
	Pyruvate dehydrogenase protein X component, mitochondrial OS=Homo sapiens GN=PDHX PE=1 SV=3	O00330		3		Zinc finger protein Rlf	Q13129		2
	Protein piccolo OS=Homo sapiens GN=PCLO PE=1 SV=4	Q9Y6V0	4	3		Histone-lysine N-methyltransferase 2C	Q8NEZ4		2
	Transmembrane protein 132D OS=Homo sapiens GN=TMEM132D PE=1 SV=1	Q14C87	3	3		DNA-directed RNA polymerase III subunit RPC1	O14802		2
	Serine/threonine-protein phosphatase PP1-beta catalytic subunit OS=Homo sapiens GN=PPP1CB PE=1 SV=3	P62140	3	3		Nuclear pore complex protein Nup88 (Fragment)	J3KMX1		2
	Ras-related protein Rab-35 OS=Homo sapiens GN=RAB35 PE=1 SV=1	Q15286	1	3		Breast cancer type 2 susceptibility protein	P51587	3	2
	Probable cation-transporting ATPase 13A3 OS=Homo sapiens GN=ATP13A3 PE=1 SV=4	Q9H7F0	1	3		Splicing factor U2AF 65 kDa subunit	P26368	6	2
	Protein SET OS=Homo sapiens GN=SET PE=1 SV=3	Q01105		3		Transcription initiation factor TFIID subunit 6 (Fragment)	C9JFL8		2
	Protein QN1 homolog OS=Homo sapiens GN=KIAA1009 PE=1 SV=2	Q5TB80		3		Mitogen-activated protein kinase 1	P28482	1	2
	Pleckstrin homology domain-containing family G member 3 OS=Homo sapiens GN=PLEKHG3 PE=1 SV=1	A1L390		3		mRNA-decapping enzyme 1A (Fragment)	A0A087WVE6		2
	Striated muscle preferentially expressed protein kinase OS=Homo sapiens GN=SPEG PE=1 SV=4	Q15772	1	3		Rho GTPase-activating protein 21	A0A087WW76		2
	Target of Myb protein 1 OS=Homo sapiens GN=TOM1 PE=1 SV=2	O60784		3		DNA-directed RNA polymerase I subunit RPA2	Q9H9Y6		2
	Probable E3 ubiquitin-protein ligase HECTD4 OS=Homo sapiens GN=HECTD4 PE=1 SV=5	Q9Y4D8	1	3		COP9 signalosome complex subunit 6	E7EM64	1	2
	Targeting protein for Xklp2 OS=Homo sapiens GN=TPX2 PE=1 SV=2	Q9ULW0		3		Zinc finger and BTB domain-containing protein 11	O95625		2
	UPF0258 protein KIAA1024 OS=Homo sapiens GN=KIAA1024 PE=2 SV=3	Q9UPX6	2	3		Acyl-CoA dehydrogenase family member 9, mitochondrial (Fragment)	H0Y8Z9		2
	Zinc finger FYVE domain-containing protein 9 OS=Homo sapiens GN=ZFYVE9 PE=1 SV=2	O95405	1	3		Telomerase-binding protein EST1A	Q86US8	2	2
	Ras and Rab interactor 1 OS=Homo sapiens GN=RIN1 PE=1 SV=4	Q13671	1	3		Zinc finger and BTB domain-containing protein 10	Q96DT7		2
	Tau-tubulin kinase 1 OS=Homo sapiens GN=TTBK1 PE=1 SV=2	Q5TCY1	1	3		Helicase ARIP4 (Fragment)	H0Y760		2
	Protein scribble homolog OS=Homo sapiens GN=SCRIB PE=1 SV=4	Q14160	1	3		Ribonuclease P protein subunit p40	X6RLL4	1	2
	Ran-binding protein 9 OS=Homo sapiens GN=RANBP9 PE=1 SV=1	Q96S59		3		Vigilin (Fragment)	H0Y394		2
	Uncharacterized protein C20orf160 OS=Homo sapiens GN=C20orf160 PE=2 SV=3	Q9NUG4	2	3		Zinc finger CCCH domain-containing protein 11A	O75152	8	2
	Zinc finger FYVE domain-containing protein 26 OS=Homo sapiens GN=ZFYVE26 PE=1 SV=3	Q68DK2	2	3		Leucine-rich repeat-containing protein 47	Q8N1G4	1	2
	Unconventional myosin-IXb OS=Homo sapiens GN=MYO9B PE=1 SV=3	Q13459	1	3		Serine protease HTRA2, mitochondrial (Fragment)	A0A0C4DG44	1	2
	Probable ATP-dependent RNA helicase DHX37 OS=Homo sapiens GN=DHX37 PE=1 SV=1	Q8IY37		3		Parafibromin	Q6P1J9	2	2
	Superkiller viralicidic activity 2-like 2 OS=Homo sapiens GN=SKIV2L2 PE=1 SV=3	P42285	2	3		60S ribosomal protein L21	G3V1B3	2	2
	Transient receptor potential cation channel subfamily M member 8 OS=Homo sapiens GN=TRPM8 PE=2 SV=2	Q7Z2W7		3		Phosphatidylinositol 3-kinase regulatory subunit alpha	P27986		2
	Vacuolar protein sorting-associated protein 13B OS=Homo sapiens GN=VPS13B PE=1 SV=2	Q7Z7G8	2	3		Coiled-coil domain-containing protein 137	Q6PK04	1	2
	Reticulon-4-interacting protein 1, mitochondrial OS=Homo sapiens GN=RTN4IP1 PE=1 SV=2	Q8WWV3	2	3		Transmembrane protein 43	Q9BTV4		2
	Vacuolar protein sorting-associated protein 11 homolog OS=Homo sapiens GN=VPS11 PE=1 SV=1	Q9H270	2	3		Cysteine and histidine-rich domain-containing protein 1	Q9UHD1		2
	Probable G-protein coupled receptor 179 OS=Homo sapiens GN=GPR179 PE=1 SV=2	Q6PRD1		3		Fructose-bisphosphate aldolase (Fragment)	H3BUH7		2
	Phosphatidylinositol 4-phosphate 3-kinase C2 domain-containing subunit beta OS=Homo sapiens GN=PIK3C2B PE=1 SV=2	O00750	3	3		Eukaryotic translation initiation factor 2-alpha kinase 4 (Fragment)	H0YME5	1	2
	Neutral amino acid transporter B(0) OS=Homo sapiens GN=SLC1A5 PE=1 SV=2	Q15758	3	3		AP-3 complex subunit delta-1	O14617		2
	Translation factor GUF1, mitochondrial OS=Homo sapiens GN=GUF1 PE=1 SV=1	Q8N442	1	3		WD repeat-containing protein 26 (Fragment)	H0Y9R3	1	2
	Phosphatidylinositol-binding clathrin assembly protein OS=Homo sapiens GN=PICALM PE=1 SV=2	Q13492		3		PHD finger protein 10	S5FZ81	1	2
	Sulfate anion transporter 1 OS=Homo sapiens GN=SLC26A1 PE=2 SV=2	Q9H2B4	2	3		Protein C7orf55-LUC7L2	A0A0A6YYC3		2
	Zinc finger protein 609 OS=Homo sapiens GN=ZNF609 PE=1 SV=2	O15014		3		Phospholipase A-2-activating protein	E5RIM3		2
	Putative upstream-binding factor 1-like protein 6 OS=Homo sapiens GN=UBTFL6 PE=5 SV=1	P0CB48	1	3		ATP-dependent DNA helicase Q5	O94762		2
	Uncharacterized protein C19orf21 OS=Homo sapiens GN=C19orf21 PE=1 SV=1	Q8IVT2	2	3		Arf-GAP with coiled-coil, ANK repeat and PH domain-containing protein 2	A0A087X1H5		2
	Suppression of tumorigenicity 5 protein OS=Homo sapiens GN=ST5 PE=1 SV=3	P78524	3	3		Cytoplasmic dynein 1 intermediate chain 2 (Fragment)	E7EQU2	2	2
	Suppressor APC domain-containing protein 2 OS=Homo sapiens GN=SAPCD2 PE=2 SV=2	Q86UD0	2	3		Protein ELYS	Q8WYP5	1	2
	Telomerase reverse transcriptase OS=Homo sapiens GN=TERT PE=1 SV=1	O14746	2	3		Erlin-1	O75477		2
	Probable exonuclease mut-7 homolog OS=Homo sapiens GN=EXD3 PE=1 SV=3	Q8N9H8	5	3		39S ribosomal protein L38, mitochondrial	Q96DV4		2
	UPF0696 protein C11orf68 OS=Homo sapiens GN=C11orf68 PE=4 SV=1	J3KQG9		3		CREB-binding protein	Q92793		2
	Probable E3 ubiquitin-protein ligase MYCBP2 OS=Homo sapiens GN=MYCBP2 PE=1 SV=3	O75592		3		Peptidyl-prolyl cis-trans isomerase (Fragment)	C9JN15	2	2
	Phosphopantothenate--cysteine ligase OS=Homo sapiens GN=PPCS PE=1 SV=2	Q9HAB8	1	3		Gem-associated protein 5	Q8TEQ6	1	2
	Pyrroline-5-carboxylate reductase 1, mitochondrial OS=Homo sapiens GN=PYCR1 PE=1 SV=2	P32322	8	3		DNA mismatch repair protein Msh2	A0A087X1E7	2	2
	Phosphorylase b kinase regulatory subunit alpha, liver isoform OS=Homo sapiens GN=PHKA2 PE=1 SV=1	P46019		3		Shugoshin-like 2	Q562F6		2
	RIMS-binding protein 3A OS=Homo sapiens GN=RIMBP3 PE=1 SV=4	Q9UFD9		3		Zinc finger protein 592	H0YM74	2	2
	Proto-oncogene Wnt-3 OS=Homo sapiens GN=WNT3 PE=2 SV=2	P56703		3		Immunoglobulin superfamily member 10	Q6WRI0		2
	Prolow-density lipoprotein receptor-related protein 1 OS=Homo sapiens GN=LRP1 PE=1 SV=2	Q07954	5	3		Histone-lysine N-methyltransferase NSD2 (Fragment)	H0Y9U6	1	2
	Uncharacterized protein CXorf67 OS=Homo sapiens GN=CXorf67 PE=2 SV=1	Q86X51		3		Protein DGCR14	Q96DF8		2
	Protocadherin-12 OS=Homo sapiens GN=PCDH12 PE=2 SV=1	Q9NPG4		3		Translocation protein SEC63 homolog	Q9UGP8		2
	Serine/arginine-rich splicing factor 4 OS=Homo sapiens GN=SRSF4 PE=1 SV=2	Q08170		3		Unconventional myosin-IXa	H3BRD5		2
	Protein CASC5 OS=Homo sapiens GN=CASC5 PE=1 SV=3	Q8NG31		3		Extended synaptotagmin-2 (Fragment)	H7BXI1		2
	Signal recognition particle 54 kDa protein OS=Homo sapiens GN=SRP54 PE=1 SV=1	P61011	1	3		Fanconi anemia group D2 protein	Q9BXW9	1	2
	Signal recognition particle 68 kDa protein OS=Homo sapiens GN=SRP68 PE=1 SV=2	Q9UHB9	5	3		Prelamin-A/C (Fragment)	H0YAB0		2
	Putative ATP-dependent RNA helicase DHX30 OS=Homo sapiens GN=DHX30 PE=1 SV=1	Q7L2E3	1	3		Pre-mRNA-processing factor 39	Q86UA1		2
	Prolyl 3-hydroxylase 1 OS=Homo sapiens GN=LEPRE1 PE=1 SV=2	Q32P28	4	3		Sorting nexin	A0A087WYU1	1	2
	Neural cell adhesion molecule 1 OS=Homo sapiens GN=NCAM1 PE=1 SV=3	P13591		3		Zinc finger protein 428	Q96B54		2
	Serine hydroxymethyltransferase, cytosolic OS=Homo sapiens GN=SHMT1 PE=1 SV=1	P34896		3		THO complex subunit 3	Q96J01	2	2
	Transcription factor GATA-4 OS=Homo sapiens GN=GATA4 PE=1 SV=2	P43694	2	3		Aspartate aminotransferase, mitochondrial	P00505		2
	Patched domain-containing protein 2 OS=Homo sapiens GN=PTCHD2 PE=2 SV=2	Q9P2K9		3		Translocon-associated protein subunit alpha	C9J3L8	1	2
	Zinc finger protein 503 OS=Homo sapiens GN=ZNF503 PE=1 SV=1	Q96F45	1	3		Asparagine--tRNA ligase, cytoplasmic	O43776	3	2
	Protocadherin Fat 1 OS=Homo sapiens GN=FAT1 PE=1 SV=2	Q14517	2	3		Unconventional myosin-Ic	F5H6E2		2
	Transcription factor SOX-4 OS=Homo sapiens GN=SOX4 PE=1 SV=1	Q06945	1	3		Acetyl-CoA carboxylase 1	Q13085		2
	Separin OS=Homo sapiens GN=ESPL1 PE=1 SV=3	Q14674	4	3		Solute carrier family 12 member 6	B3KXX3		2
	Neuron navigator 3 OS=Homo sapiens GN=NAV3 PE=1 SV=3	Q8IVL0	4	3		Synergin gamma	Q9UMZ2		2
	Protein crumbs homolog 1 OS=Homo sapiens GN=CRB1 PE=1 SV=2	P82279	7	3		Exocyst complex component 8	Q8IYI6		2
	Tuberin OS=Homo sapiens GN=TSC2 PE=1 SV=2	P49815	1	3		Unconventional myosin-Vb (Fragment)	A0A0A0MR36	10	2
	WD repeat and FYVE domain-containing protein 3 OS=Homo sapiens GN=WDFY3 PE=1 SV=2	Q8IZQ1	5	3		Exocyst complex component 7 (Fragment)	A0A0A0MRE1		2
	Nucleoprotein TPR OS=Homo sapiens GN=TPR PE=1 SV=3	P12270	10	3		Supervillin	O95425	1	2
	Zinc finger protein 516 OS=Homo sapiens GN=ZNF516 PE=1 SV=1	Q92618	3	3		ATP-citrate synthase	P53396	2	2
	Tonsoku-like protein OS=Homo sapiens GN=TONSL PE=1 SV=2	Q96HA7		3		Probable ATP-dependent RNA helicase DDX31	F8WAJ0		2
	U1 small nuclear ribonucleoprotein 70 kDa OS=Homo sapiens GN=SNRNP70 PE=1 SV=2	P08621	2	3		Probable ATP-dependent RNA helicase DDX46	Q7L014	1	2
	Netrin receptor DCC OS=Homo sapiens GN=DCC PE=1 SV=2	P43146		3		Long-chain-fatty-acid--CoA ligase 3	O95573	1	2
	Ubiquitin carboxyl-terminal hydrolase 16 OS=Homo sapiens GN=USP16 PE=1 SV=1	Q9Y5T5		3		Phosphorylase b kinase regulatory subunit beta	Q93100		2
	Proteasome activator complex subunit 1 OS=Homo sapiens GN=PSME1 PE=1 SV=1	Q06323	1	3		Inhibitor of nuclear factor kappa-B kinase-interacting protein	Q70UQ0	2	2
	Serum response factor OS=Homo sapiens GN=SRF PE=1 SV=1	P11831	3	3		Inner centromere protein	Q9NQS7		2
	Ubiquitin carboxyl-terminal hydrolase 13 OS=Homo sapiens GN=USP13 PE=1 SV=2	Q92995		3		39S ribosomal protein L4, mitochondrial (Fragment)	K7ES61		2
	Serine/threonine-protein kinase ULK2 OS=Homo sapiens GN=ULK2 PE=1 SV=3	Q8IYT8		3		Probable 2-oxoglutarate dehydrogenase E1 component DHKTD1, mitochondrial (Fragment)	H7C1J3	1	2
	SH2 domain-containing adapter protein F OS=Homo sapiens GN=SHF PE=4 SV=1	H0YLD8	1	3		Condensin complex subunit 3	Q9BPX3		2
	Serine/threonine-protein kinase SMG1 OS=Homo sapiens GN=SMG1 PE=1 SV=3	Q96Q15	3	3		Protein SEC13 homolog	A8MXL6		2
	Potassium voltage-gated channel subfamily KQT member 2 OS=Homo sapiens GN=KCNQ2 PE=1 SV=2	O43526	1	3		Endonuclease III-like protein 1 (Fragment)	H3BRL9		2
	Ubiquitin carboxyl-terminal hydrolase 11 OS=Homo sapiens GN=USP11 PE=1 SV=3	P51784		3		Protein SGT1 (Fragment)	C9J316		2
	Uncharacterized protein KIAA0528 OS=Homo sapiens GN=KIAA0528 PE=1 SV=1	Q86YS7		3		Serine-protein kinase ATM	Q13315	2	2
	Sideroflexin-3 OS=Homo sapiens GN=SFXN3 PE=2 SV=2	Q9BWM7	5	3		Lysine-specific histone demethylase 1A	O60341		2
	Protocadherin-7 OS=Homo sapiens GN=PCDH7 PE=1 SV=2	O60245		3		Uncharacterized protein C10orf12	Q8N655	1	2
	Semaphorin-3G OS=Homo sapiens GN=SEMA3G PE=1 SV=1	Q9NS98		3		Histone-lysine N-methyltransferase SETD2 (Fragment)	H7C3H4		2
	SH3 and multiple ankyrin repeat domains protein 2 OS=Homo sapiens GN=SHANK2 PE=1 SV=3	Q9UPX8	1	3		E3 ubiquitin-protein ligase Hakai (Fragment)	C9J2P9	1	2
	Serine/threonine-protein kinase MRCK beta OS=Homo sapiens GN=CDC42BPB PE=1 SV=2	Q9Y5S2		3		Stomatin-like protein 2, mitochondrial	A0A087WYB4	1	2
	Palmitoyl-protein thioesterase 1 OS=Homo sapiens GN=PPT1 PE=1 SV=1	P50897	4	3		TBC1 domain family member 31	E7EWW7		2
	Transcription elongation factor SPT6 OS=Homo sapiens GN=SUPT6H PE=1 SV=2	Q7KZ85	4	3		Protein transport protein Sec23A	F5H365	1	2
	Serine/threonine-protein kinase MRCK beta (Fragment) OS=Homo sapiens GN=CDC42BPB PE=4 SV=1	H0YLY0	1	3		Acetyltransferase component of pyruvate dehydrogenase complex (Fragment)	H0YDD4		2
	Nucleosome-remodeling factor subunit BPTF OS=Homo sapiens GN=BPTF PE=1 SV=3	Q12830	2	3		Nuclear receptor coactivator 3	Q9Y6Q9		2
	Serine/threonine-protein kinase LMTK3 OS=Homo sapiens GN=LMTK3 PE=2 SV=2	Q96Q04		3		Glutamine--fructose-6-phosphate aminotransferase [isomerizing] 1	Q06210		2
	ProSAP-interacting protein 1 OS=Homo sapiens GN=PROSAPIP1 PE=2 SV=1	O60299	2	3		Zinc finger and SCAN domain-containing protein 25	A0A0C4DFN0		2
	Uncharacterized protein FLJ90687 OS=Homo sapiens PE=1 SV=1	P0C876		3		Protein Wiz	B9EGQ5	2	2
	Short transient receptor potential channel 4-associated protein OS=Homo sapiens GN=TRPC4AP PE=1 SV=2	Q8TEL6	1	3		Histone lysine demethylase PHF8 (Fragment)	H0Y589	1	2
	Williams-Beuren syndrome chromosomal region 16 protein OS=Homo sapiens GN=WBSCR16 PE=1 SV=2	Q96I51		3		DNA polymerase	F5H1D6		2
	Putative methyltransferase NSUN5 OS=Homo sapiens GN=NSUN5 PE=1 SV=2	Q96P11	1	3		Calcium-binding and coiled-coil domain-containing protein 1	Q9P1Z2		2
	S-adenosylmethionine synthase isoform type-2 OS=Homo sapiens GN=MAT2A PE=1 SV=1	P31153	1	3		Chromodomain-helicase-DNA-binding protein 7	Q9P2D1		2
	Sodium/potassium-transporting ATPase subunit alpha-1 OS=Homo sapiens GN=ATP1A1 PE=1 SV=1	P05023	2	3		E3 ubiquitin/ISG15 ligase TRIM25	Q14258	3	2
	T-lymphoma invasion and metastasis-inducing protein 1 OS=Homo sapiens GN=TIAM1 PE=1 SV=2	Q13009	1	3		60S ribosomal protein L3 (Fragment)	B5MCW2	2	2
	RuvB-like 2 OS=Homo sapiens GN=RUVBL2 PE=1 SV=3	Q9Y230	1	3		Nuclear pore complex protein Nup160 (Fragment)	E9PR16	1	2
	Otolin-1 OS=Homo sapiens GN=OTOL1 PE=3 SV=1	A6NHN0	1	3		Glycerol-3-phosphate acyltransferase 3	Q53EU6		2
	Zinc finger CCCH domain-containing protein 7A OS=Homo sapiens GN=ZC3H7A PE=1 SV=1	Q8IWR0	1	3		Pumilio domain-containing protein KIAA0020	Q15397		2
	Putative homeodomain transcription factor 1 OS=Homo sapiens GN=PHTF1 PE=2 SV=2	Q9UMS5	2	3		Puromycin-sensitive aminopeptidase	E9PLK3		2
	Soluble scavenger receptor cysteine-rich domain-containing protein SSC5D OS=Homo sapiens GN=SSC5D PE=2 SV=3	A1L4H1		3		Protein unc-45 homolog A	Q9H3U1		2
	Solute carrier family 12 member 7 OS=Homo sapiens GN=SLC12A7 PE=1 SV=3	Q9Y666		3		Centriolar coiled-coil protein of 110 kDa	O43303		2
	Uncharacterized protein KIAA2026 OS=Homo sapiens GN=KIAA2026 PE=2 SV=2	Q5HYC2	4	3		Oxysterol-binding protein-related protein 6	Q9BZF3		2
	RNA-binding protein Raly OS=Homo sapiens GN=RALY PE=1 SV=1	Q9UKM9		3		60S ribosomal protein L26-like 1 (Fragment)	E5RHH1		2
	RuvB-like 1 OS=Homo sapiens GN=RUVBL1 PE=1 SV=1	Q9Y265	1	3		Protein HIRA	P54198		2
	RNA-binding protein 4B OS=Homo sapiens GN=RBM4B PE=1 SV=1	Q9BQ04	2	3		Zinc finger protein 579	Q8NAF0	6	2
	Procollagen-lysine,2-oxoglutarate 5-dioxygenase 1 OS=Homo sapiens GN=PLOD1 PE=1 SV=2	Q02809	5	3		Interleukin enhancer-binding factor 2	B4DY09		2
	Voltage-dependent T-type calcium channel subunit alpha-1G OS=Homo sapiens GN=CACNA1G PE=2 SV=3	O43497	5	3		Zinc finger protein 574	Q6ZN55		2
	Voltage-dependent P/Q-type calcium channel subunit alpha-1A OS=Homo sapiens GN=CACNA1A PE=1 SV=2	O00555	3	3		Host cell factor 1	P51610	1	2
	Peripheral-type benzodiazepine receptor-associated protein 1 OS=Homo sapiens GN=BZRAP1 PE=1 SV=2	O95153		3		General transcription factor IIF subunit 1 (Fragment)	M0R0R9		2
	Otogelin OS=Homo sapiens GN=OTOG PE=2 SV=3	Q6ZRI0	2	3		EH domain-containing protein 4	A0A087WUA5		2
	Peroxiredoxin-2 OS=Homo sapiens GN=PRDX2 PE=1 SV=5	P32119	2	3		Serine/arginine repetitive matrix protein 1 (Fragment)	M0R088		2
	Tubulin beta-3 chain OS=Homo sapiens GN=TUBB3 PE=1 SV=2	Q13509		3		E3 ubiquitin-protein ligase RBBP6	Q7Z6E9		2
	Nuclear factor NF-kappa-B p100 subunit OS=Homo sapiens GN=NFKB2 PE=1 SV=4	Q00653	3	3		Protein PML	P29590		2
	Transducin beta-like protein 2 OS=Homo sapiens GN=TBL2 PE=4 SV=1	F8WCR3	6	3		Ankyrin repeat and SAM domain-containing protein 3 (Fragment)	K7ERF3		2
	Procollagen-lysine,2-oxoglutarate 5-dioxygenase 3 OS=Homo sapiens GN=PLOD3 PE=1 SV=1	O60568	4	3		Utrophin	P46939		2
	Pecanex-like protein 3 OS=Homo sapiens GN=PCNXL3 PE=1 SV=2	Q9H6A9	1	3		Protein SCAF8	Q9UPN6		2
	V-type proton ATPase catalytic subunit A OS=Homo sapiens GN=ATP6V1A PE=1 SV=2	P38606	3	3		Targeting protein for Xklp2	Q9ULW0	1	2
	Putative golgin subfamily A member 8I OS=Homo sapiens GN=GOLGA8IP PE=5 SV=2	A6NC78		3		E3 ubiquitin-protein ligase TRIM33 (Fragment)	H0Y612	3	2
	V-type proton ATPase subunit d 1 OS=Homo sapiens GN=ATP6V0D1 PE=1 SV=1	P61421		3		Serpin B6	P35237	3	2
	Protein Dos OS=Homo sapiens GN=DOS PE=1 SV=2	Q8N350		3		Cell division cycle-associated protein 2	E9PEI0	1	2
	PDZ domain-containing protein 2 OS=Homo sapiens GN=PDZD2 PE=1 SV=4	O15018	2	3		Protein RTF2 homolog	Q9BY42		2
	Pentatricopeptide repeat-containing protein 3, mitochondrial OS=Homo sapiens GN=PTCD3 PE=1 SV=3	Q96EY7	3	3		Nucleoporin GLE1	Q53GS7	1	2
	Sodium bicarbonate cotransporter 3 (Fragment) OS=Homo sapiens GN=SLC4A7 PE=4 SV=1	C9JRP1	4	3		40S ribosomal protein S30	P62861	1	2
	Tyrosine-protein kinase HCK OS=Homo sapiens GN=HCK PE=1 SV=5	P08631	1	3		Cullin-4A	A0A0A0MR50	1	2
	Nucleoporin SEH1 OS=Homo sapiens GN=SEH1L PE=1 SV=3	Q96EE3		3		HLA class I histocompatibility antigen, A-3 alpha chain	Q5SRN7		2
	Integrin alpha-2 OS=Homo sapiens GN=ITGA2 PE=1 SV=1	P17301	4	2		Upstream-binding protein 1	Q9NZI7		2
	Homeobox protein cut-like 1 OS=Homo sapiens GN=CUX1 PE=1 SV=3	P39880	1	2		Catenin (Cadherin-associated protein), alpha 1, 102kDa, isoform CRA_a	G3XAM7	3	2
	Anaphase-promoting complex subunit 1 OS=Homo sapiens GN=ANAPC1 PE=1 SV=1	Q9H1A4		2		40S ribosomal protein S18	P62269		2
	Integrin alpha-3 OS=Homo sapiens GN=ITGA3 PE=1 SV=5	P26006		2
	Integrin beta-1 OS=Homo sapiens GN=ITGB1 PE=1 SV=2	P05556	1	2
	DNA helicase MCM9 OS=Homo sapiens GN=MCM9 PE=1 SV=4	Q9NXL9	1	2
	Death domain-associated protein 6 OS=Homo sapiens GN=DAXX PE=1 SV=2	Q9UER7	1	2
	Dual specificity protein kinase CLK4 OS=Homo sapiens GN=CLK4 PE=1 SV=1	Q9HAZ1		2
	GPI mannosyltransferase 4 OS=Homo sapiens GN=PIGZ PE=2 SV=4	Q86VD9		2
	ATP-binding cassette sub-family C member 8 OS=Homo sapiens GN=ABCC8 PE=1 SV=6	Q09428		2
	Interleukin-20 receptor subunit alpha OS=Homo sapiens GN=IL20RA PE=1 SV=2	Q9UHF4		2
	Kinesin-like protein KIF12 OS=Homo sapiens GN=KIF12 PE=2 SV=3	Q96FN5		2
	Dual specificity testis-specific protein kinase 2 OS=Homo sapiens GN=TESK2 PE=2 SV=1	Q96S53	1	2
	Glutathione peroxidase 1 OS=Homo sapiens GN=GPX1 PE=1 SV=4	P07203	1	2
	Interleukin-17 receptor C OS=Homo sapiens GN=IL17RC PE=1 SV=2	Q8NAC3	1	2
	H/ACA ribonucleoprotein complex subunit 3 OS=Homo sapiens GN=NOP10 PE=4 SV=1	H0YM60		2
	Dihydropyrimidinase-related protein 3 OS=Homo sapiens GN=DPYSL3 PE=1 SV=1	Q14195	2	2
	Acid-sensing ion channel 3 OS=Homo sapiens GN=ASIC3 PE=1 SV=2	Q9UHC3		2
	E3 ubiquitin-protein ligase RNF25 OS=Homo sapiens GN=RNF25 PE=1 SV=1	Q96BH1	1	2
	A-kinase anchor protein 1, mitochondrial OS=Homo sapiens GN=AKAP1 PE=1 SV=1	Q92667		2
	Band 4.1-like protein 2 OS=Homo sapiens GN=EPB41L2 PE=1 SV=1	O43491		2
	Dual specificity mitogen-activated protein kinase kinase 5 OS=Homo sapiens GN=MAP2K5 PE=1 SV=2	Q13163	1	2
	Glutamine--fructose-6-phosphate aminotransferase [isomerizing] 1 OS=Homo sapiens GN=GFPT1 PE=1 SV=3	Q06210	4	2
	Graves disease carrier protein OS=Homo sapiens GN=SLC25A16 PE=2 SV=3	P16260	2	2
	AF4/FMR2 family member 4 OS=Homo sapiens GN=AFF4 PE=1 SV=1	Q9UHB7		2
	Kinesin-like protein KIF6 OS=Homo sapiens GN=KIF6 PE=3 SV=2	E7EUN7		2
	FAS-associated factor 2 OS=Homo sapiens GN=FAF2 PE=1 SV=2	Q96CS3	2	2
	Interferon regulatory factor 2-binding protein-like OS=Homo sapiens GN=IRF2BPL PE=1 SV=1	Q9H1B7		2
	Disco-interacting protein 2 homolog A OS=Homo sapiens GN=DIP2A PE=1 SV=2	Q14689	1	2
	ATPase family AAA domain-containing protein 2B OS=Homo sapiens GN=ATAD2B PE=1 SV=3	Q9ULI0	3	2
	G-protein coupled receptor-associated sorting protein 2 OS=Homo sapiens GN=GPRASP2 PE=1 SV=1	Q96D09	5	2
	ADAMTS-like protein 1 OS=Homo sapiens GN=ADAMTSL1 PE=1 SV=4	Q8N6G6	2	2
	DALR anticodon-binding domain-containing protein 3 OS=Homo sapiens GN=DALRD3 PE=2 SV=2	Q5D0E6	1	2
	Dynein heavy chain 11, axonemal OS=Homo sapiens GN=DNAH11 PE=1 SV=3	Q96DT5		2
	Acetyl-CoA acetyltransferase, cytosolic OS=Homo sapiens GN=ACAT2 PE=1 SV=2	Q9BWD1	1	2
	D-3-phosphoglycerate dehydrogenase OS=Homo sapiens GN=PHGDH PE=1 SV=4	O43175		2
	CTTNBP2 N-terminal-like protein OS=Homo sapiens GN=CTTNBP2NL PE=1 SV=2	Q9P2B4	1	2
	Dymeclin OS=Homo sapiens GN=DYM PE=1 SV=1	Q7RTS9	1	2
	Disintegrin and metalloproteinase domain-containing protein 19 OS=Homo sapiens GN=ADAM19 PE=1 SV=3	Q9H013	3	2
	Alpha-tocopherol transfer protein-like OS=Homo sapiens GN=TTPAL PE=2 SV=2	Q9BTX7	5	2
	ATP-binding cassette sub-family F member 3 OS=Homo sapiens GN=ABCF3 PE=1 SV=2	Q9NUQ8		2
	Kinesin-like protein KIF18B OS=Homo sapiens GN=KIF18B PE=1 SV=3	Q86Y91		2
	DC-STAMP domain-containing protein 2 OS=Homo sapiens GN=DCST2 PE=2 SV=2	Q5T1A1		2
	G-protein coupled receptor 56 OS=Homo sapiens GN=GPR56 PE=1 SV=2	Q9Y653		2
	Acyl-coenzyme A thioesterase THEM4 OS=Homo sapiens GN=THEM4 PE=1 SV=1	Q5T1C6		2
	Ankyrin repeat and BTB/POZ domain-containing protein BTBD11 OS=Homo sapiens GN=BTBD11 PE=2 SV=3	A6QL63	1	2
	Astrotactin-1 OS=Homo sapiens GN=ASTN1 PE=1 SV=3	O14525		2
	GREB1-like protein OS=Homo sapiens GN=GREB1L PE=2 SV=2	Q9C091	1	2
	Glutaminyl-peptide cyclotransferase-like protein OS=Homo sapiens GN=QPCTL PE=1 SV=2	Q9NXS2	1	2
	Glutamine-rich protein 2 OS=Homo sapiens GN=QRICH2 PE=2 SV=1	Q9H0J4	3	2
	Cullin-5 OS=Homo sapiens GN=CUL5 PE=1 SV=4	Q93034	2	2
	Homeobox protein notochord OS=Homo sapiens GN=NOTO PE=2 SV=2	A8MTQ0	5	2
	ADP-ribosylation factor-like protein 6-interacting protein 4 OS=Homo sapiens GN=ARL6IP4 PE=1 SV=1	Q66PJ3	1	2
	HCLS1-binding protein 3 OS=Homo sapiens GN=HS1BP3 PE=1 SV=1	Q53T59	1	2
	DIS3-like exonuclease 1 OS=Homo sapiens GN=DIS3L PE=1 SV=2	Q8TF46		2
	Cullin-4B OS=Homo sapiens GN=CUL4B PE=1 SV=4	Q13620	1	2
	Kinesin-like protein KIF2A OS=Homo sapiens GN=KIF2A PE=1 SV=3	O00139		2
	Ig heavy chain V-I region EU OS=Homo sapiens PE=1 SV=1	P01742	4	2
	Dynein heavy chain 14, axonemal OS=Homo sapiens GN=DNAH14 PE=2 SV=3	Q0VDD8	2	2
	Adenomatous polyposis coli protein OS=Homo sapiens GN=APC PE=1 SV=2	P25054	1	2
	G-protein coupled receptor 98 OS=Homo sapiens GN=GPR98 PE=1 SV=2	Q8WXG9		2
	Glypican-4 OS=Homo sapiens GN=GPC4 PE=1 SV=4	O75487	1	2
	Induced myeloid leukemia cell differentiation protein Mcl-1 OS=Homo sapiens GN=MCL1 PE=1 SV=3	Q07820		2
	E3 UFM1-protein ligase 1 OS=Homo sapiens GN=UFL1 PE=1 SV=2	O94874	5	2
	Angiomotin-like protein 1 OS=Homo sapiens GN=AMOTL1 PE=1 SV=1	Q8IY63		2
	Inositol monophosphatase 2 OS=Homo sapiens GN=IMPA2 PE=1 SV=1	O14732		2
	Deoxyuridine 5'-triphosphate nucleotidohydrolase, mitochondrial OS=Homo sapiens GN=DUT PE=1 SV=4	P33316	4	2
	Beta-1,3-N-acetylglucosaminyltransferase lunatic fringe OS=Homo sapiens GN=LFNG PE=1 SV=2	Q8NES3	2	2
	Cystic fibrosis transmembrane conductance regulator OS=Homo sapiens GN=CFTR PE=1 SV=3	P13569	1	2
	Glypican-1 OS=Homo sapiens GN=GPC1 PE=1 SV=2	P35052		2
	Cyclin-dependent kinase 12 OS=Homo sapiens GN=CDK12 PE=1 SV=2	Q9NYV4	1	2
	Kelch-like protein 20 OS=Homo sapiens GN=KLHL20 PE=1 SV=4	Q9Y2M5		2
	Cystathionine beta-synthase OS=Homo sapiens GN=CBS PE=1 SV=2	P35520		2
	Inactive ubiquitin carboxyl-terminal hydrolase 54 OS=Homo sapiens GN=USP54 PE=1 SV=4	Q70EL1	1	2
	Disks large homolog 2 OS=Homo sapiens GN=DLG2 PE=1 SV=3	Q15700	1	2
	Golgi integral membrane protein 4 OS=Homo sapiens GN=GOLIM4 PE=1 SV=1	O00461		2
	Guanine nucleotide-binding protein G(s) subunit alpha isoforms XLas OS=Homo sapiens GN=GNAS PE=1 SV=2	Q5JWF2		2
	Hypoxia up-regulated protein 1 OS=Homo sapiens GN=HYOU1 PE=1 SV=1	Q9Y4L1	3	2
	Homeobox protein HMX1 OS=Homo sapiens GN=HMX1 PE=2 SV=2	Q9NP08		2
	Adenylate cyclase type 4 OS=Homo sapiens GN=ADCY4 PE=1 SV=1	Q8NFM4		2
	Ataxin-7-like protein 1 OS=Homo sapiens GN=ATXN7L1 PE=2 SV=3	Q9ULK2	1	2
	Alpha-protein kinase 3 OS=Homo sapiens GN=ALPK3 PE=2 SV=2	Q96L96		2
	Angiotensin-converting enzyme, soluble form OS=Homo sapiens GN=ACE PE=4 SV=1	J3QKZ3	3	2
	Inhibitor of growth protein 1 OS=Homo sapiens GN=ING1 PE=1 SV=2	Q9UK53	1	2
	Hydroxyacyl-coenzyme A dehydrogenase, mitochondrial OS=Homo sapiens GN=HADH PE=1 SV=3	Q16836		2
	E3 ubiquitin-protein ligase UBR4 OS=Homo sapiens GN=UBR4 PE=1 SV=1	Q5T4S7	2	2
	Cysteine and histidine-rich protein 1 OS=Homo sapiens GN=CYHR1 PE=4 SV=1	E9PJD7	3	2
	Basigin OS=Homo sapiens GN=BSG PE=1 SV=2	P35613	1	2
	Inosine-5'-monophosphate dehydrogenase OS=Homo sapiens GN=IMPDH1 PE=3 SV=1	A4D0Z6		2
	Homeobox protein Hox-D11 OS=Homo sapiens GN=HOXD11 PE=2 SV=3	P31277		2
	Dentin sialophosphoprotein OS=Homo sapiens GN=DSPP PE=1 SV=2	Q9NZW4		2
	Homeobox protein Hox-D9 OS=Homo sapiens GN=HOXD9 PE=2 SV=5	P28356	3	2
	E3 ubiquitin-protein ligase UHRF1 OS=Homo sapiens GN=UHRF1 PE=1 SV=1	Q96T88		2
	E3 ubiquitin-protein ligase TRIM41 OS=Homo sapiens GN=TRIM41 PE=1 SV=3	Q8WV44		2
	KAT8 regulatory NSL complex subunit 1 OS=Homo sapiens GN=KANSL1 PE=1 SV=2	Q7Z3B3		2
	A-kinase anchor protein 4 OS=Homo sapiens GN=AKAP4 PE=1 SV=1	Q5JQC9	3	2
	E3 ubiquitin-protein ligase TRIP12 OS=Homo sapiens GN=TRIP12 PE=1 SV=1	Q14669	3	2
	Actin-related protein 3B OS=Homo sapiens GN=ACTR3B PE=1 SV=1	Q9P1U1	1	2
	Autoimmune regulator OS=Homo sapiens GN=AIRE PE=1 SV=1	O43918	3	2
	Isoleucine--tRNA ligase, mitochondrial OS=Homo sapiens GN=IARS2 PE=1 SV=2	Q9NSE4		2
	Hydrocephalus-inducing protein homolog OS=Homo sapiens GN=HYDIN PE=1 SV=3	Q4G0P3	2	2
	Adenylate kinase isoenzyme 1 OS=Homo sapiens GN=AK1 PE=1 SV=3	P00568		2
	Hyccin OS=Homo sapiens GN=FAM126A PE=4 SV=1	B8ZZJ1	1	2
	Guanine nucleotide-binding protein G(i) subunit alpha-2 OS=Homo sapiens GN=GNAI2 PE=1 SV=3	P04899		2
	Activating transcription factor 7-interacting protein 2 OS=Homo sapiens GN=ATF7IP2 PE=1 SV=2	Q5U623	1	2
	Cysteine and histidine-rich domain-containing protein 1 OS=Homo sapiens GN=CHORDC1 PE=1 SV=2	Q9UHD1	2	2
	Homeobox protein cut-like 2 OS=Homo sapiens GN=CUX2 PE=1 SV=4	O14529	1	2
	Guanine nucleotide-binding protein subunit alpha-11 OS=Homo sapiens GN=GNA11 PE=1 SV=2	P29992		2
	Golgin subfamily A member 6-like protein 2 OS=Homo sapiens GN=GOLGA6L2 PE=4 SV=1	H3BMJ4	1	2
	Growth/differentiation factor 5 OS=Homo sapiens GN=GDF5 PE=1 SV=3	P43026		2
	Interphotoreceptor matrix proteoglycan 2 OS=Homo sapiens GN=IMPG2 PE=1 SV=3	Q9BZV3	1	2
	Cyclin-dependent kinase 19 OS=Homo sapiens GN=CDK19 PE=1 SV=1	Q9BWU1		2
	E3 ubiquitin-protein ligase SHPRH OS=Homo sapiens GN=SHPRH PE=1 SV=2	Q149N8		2
	ATP synthase subunit beta, mitochondrial OS=Homo sapiens GN=ATP5B PE=1 SV=3	P06576	1	2
	HCG1645011, isoform CRA_b OS=Homo sapiens GN=hCG_1645011 PE=4 SV=1	C9JZ25	1	2
	Immunoglobulin lambda-like polypeptide 1 OS=Homo sapiens GN=IGLL1 PE=1 SV=1	P15814		2
	Beta-1,3-galactosyl-O-glycosyl-glycoprotein beta-1,6-N-acetylglucosaminyltransferase 7 OS=Homo sapiens GN=GCNT7 PE=2 SV=2	Q6ZNI0	2	2
	Cyclin-dependent kinase 1 OS=Homo sapiens GN=CDK1 PE=1 SV=3	P06493		2
	Huntingtin-interacting protein 1 OS=Homo sapiens GN=HIP1 PE=1 SV=5	O00291		2
	Diacylglycerol kinase zeta OS=Homo sapiens GN=DGKZ PE=1 SV=3	Q13574		2
	Cytoplasmic dynein 1 intermediate chain 2 OS=Homo sapiens GN=DYNC1I2 PE=1 SV=3	Q13409	4	2
	Kinesin heavy chain isoform 5C OS=Homo sapiens GN=KIF5C PE=1 SV=1	O60282	1	2
	Dynein intermediate chain 2, axonemal OS=Homo sapiens GN=DNAI2 PE=1 SV=2	Q9GZS0	3	2
	Dynactin subunit 2 OS=Homo sapiens GN=DCTN2 PE=1 SV=4	Q13561	1	2
	ADP-ribosylation factor 5 OS=Homo sapiens GN=ARF5 PE=1 SV=2	P84085	2	2
	ATPase WRNIP1 OS=Homo sapiens GN=WRNIP1 PE=1 SV=2	Q96S55	1	2
	Cytoplasmic dynein 1 light intermediate chain 1 OS=Homo sapiens GN=DYNC1LI1 PE=1 SV=3	Q9Y6G9		2
	Interleukin-27 receptor subunit alpha OS=Homo sapiens GN=IL27RA PE=2 SV=2	Q6UWB1		2
	Actin-like protein 9 OS=Homo sapiens GN=ACTL9 PE=2 SV=3	Q8TC94		2
	Intraflagellar transport protein 140 homolog OS=Homo sapiens GN=IFT140 PE=1 SV=1	Q96RY7		2
	E3 ubiquitin-protein ligase MYLIP OS=Homo sapiens GN=MYLIP PE=1 SV=2	Q8WY64	3	2
	E3 ubiquitin-protein ligase TRIM32 OS=Homo sapiens GN=TRIM32 PE=1 SV=2	Q13049		2
	BBX protein OS=Homo sapiens GN=BBX PE=2 SV=1	A2RRM7		2
	Desmocollin-1 OS=Homo sapiens GN=DSC1 PE=1 SV=2	Q08554	3	2
	Kelch-like protein 4 OS=Homo sapiens GN=KLHL4 PE=2 SV=2	Q9C0H6		2
	Activator of 90 kDa heat shock protein ATPase homolog 1 OS=Homo sapiens GN=AHSA1 PE=1 SV=1	O95433	3	2
	Importin-7 OS=Homo sapiens GN=IPO7 PE=1 SV=1	O95373	1	2
	Aminoacyl tRNA synthase complex-interacting multifunctional protein 1 OS=Homo sapiens GN=AIMP1 PE=1 SV=2	Q12904		2
	Adenosine monophosphate-protein transferase FICD OS=Homo sapiens GN=FICD PE=1 SV=2	Q9BVA6		2
	Cytochrome P450 4F8 OS=Homo sapiens GN=CYP4F8 PE=1 SV=1	P98187		2
	Beta-1-syntrophin OS=Homo sapiens GN=SNTB1 PE=1 SV=3	Q13884		2
	Inactive phospholipase C-like protein 2 OS=Homo sapiens GN=PLCL2 PE=1 SV=2	Q9UPR0	1	2
	Anaphase-promoting complex subunit 4 OS=Homo sapiens GN=ANAPC4 PE=1 SV=2	Q9UJX5	1	2
	Basal cell adhesion molecule OS=Homo sapiens GN=BCAM PE=1 SV=2	P50895	2	2
	A-kinase anchor protein 8 OS=Homo sapiens GN=AKAP8 PE=1 SV=1	O43823	1	2
	Keratinocyte proline-rich protein OS=Homo sapiens GN=KPRP PE=1 SV=1	Q5T749	1	2
	Cyclin-dependent kinase 9 OS=Homo sapiens GN=CDK9 PE=1 SV=3	P50750	1	2
	Dystonin (Fragment) OS=Homo sapiens GN=DST PE=2 SV=1	Q5T0V7		2
	Amyloid beta A4 precursor protein-binding family A member 1 OS=Homo sapiens GN=APBA1 PE=1 SV=3	Q02410	2	2
	Glycerol-3-phosphate acyltransferase 4 OS=Homo sapiens GN=AGPAT6 PE=1 SV=1	Q86UL3	4	2
	HEAT repeat-containing protein 8 OS=Homo sapiens GN=HEATR8 PE=2 SV=4	Q68CQ1		2
	E3 ubiquitin-protein ligase HUWE1 OS=Homo sapiens GN=HUWE1 PE=1 SV=3	Q7Z6Z7	1	2
	Mitochondrial dicarboxylate carrier OS=Homo sapiens GN=SLC25A10 PE=2 SV=1	B4DLN1		2
	Mitochondrial inner membrane protein OS=Homo sapiens GN=IMMT PE=4 SV=2	B9A067		2
	Mitochondrial import receptor subunit TOM70 OS=Homo sapiens GN=TOMM70A PE=1 SV=1	O94826	2	2
	cGMP-inhibited 3',5'-cyclic phosphodiesterase A OS=Homo sapiens GN=PDE3A PE=1 SV=3	Q14432		2
	C2 domain-containing protein 3 OS=Homo sapiens GN=C2CD3 PE=1 SV=4	Q4AC94	3	2
	Mitochondrial GTPase 1 OS=Homo sapiens GN=MTG1 PE=1 SV=2	Q9BT17		2
	C2 domain-containing protein 2 OS=Homo sapiens GN=C2CD2 PE=1 SV=2	Q9Y426		2
	Eukaryotic translation initiation factor 3 subunit C OS=Homo sapiens GN=EIF3C PE=1 SV=1	Q99613	2	2
	Eukaryotic translation initiation factor 5 OS=Homo sapiens GN=EIF5 PE=1 SV=2	P55010		2
	AP-1 complex subunit beta-1 OS=Homo sapiens GN=AP1B1 PE=1 SV=2	Q10567	4	2
	Filamin-binding LIM protein 1 (Fragment) OS=Homo sapiens GN=FBLIM1 PE=4 SV=1	E7EWE8		2
	Mitochondrial chaperone BCS1 OS=Homo sapiens GN=BCS1L PE=1 SV=1	Q9Y276	2	2
	Mitochondrial carrier homolog 1 (Fragment) OS=Homo sapiens GN=MTCH1 PE=3 SV=1	H0Y8C3	1	2
	Arf-GAP with SH3 domain, ANK repeat and PH domain-containing protein 2 OS=Homo sapiens GN=ASAP2 PE=1 SV=3	O43150		2
	Alpha-1-syntrophin OS=Homo sapiens GN=SNTA1 PE=1 SV=1	Q13424		2
	Misshapen-like kinase 1 OS=Homo sapiens GN=MINK1 PE=1 SV=2	Q8N4C8		2
	Arginase-1 OS=Homo sapiens GN=ARG1 PE=1 SV=2	P05089	3	2
	Eukaryotic initiation factor 4A-I OS=Homo sapiens GN=EIF4A1 PE=1 SV=1	P60842	4	2
	High affinity cAMP-specific and IBMX-insensitive 3',5'-cyclic phosphodiesterase 8A OS=Homo sapiens GN=PDE8A PE=1 SV=2	O60658	1	2
	Mitochondrial dynamic protein MID51 OS=Homo sapiens GN=SMCR7L PE=1 SV=1	Q9NQG6		2
	Mitotic spindle assembly checkpoint protein MAD1 OS=Homo sapiens GN=MAD1L1 PE=1 SV=2	Q9Y6D9	4	2
	40S ribosomal protein S23 OS=Homo sapiens GN=RPS23 PE=1 SV=3	P62266	1	2
	MOSC domain-containing protein 1, mitochondrial OS=Homo sapiens GN=MARC1 PE=1 SV=1	Q5VT66		2
	Eukaryotic translation initiation factor 4E type 1B OS=Homo sapiens GN=EIF4E1B PE=2 SV=3	A6NMX2		2
	Eukaryotic translation initiation factor 4B OS=Homo sapiens GN=EIF4B PE=1 SV=2	P23588	1	2
	Eukaryotic translation initiation factor 4 gamma 3 OS=Homo sapiens GN=EIF4G3 PE=1 SV=2	O43432		2
	Monocarboxylate transporter 1 OS=Homo sapiens GN=SLC16A1 PE=1 SV=3	P53985	2	2
	Centrosomal protein of 104 kDa OS=Homo sapiens GN=CEP104 PE=1 SV=1	O60308		2
	AP-2 complex subunit mu OS=Homo sapiens GN=AP2M1 PE=1 SV=2	Q96CW1		2
	Mitochondrial inner membrane protein OXA1L OS=Homo sapiens GN=OXA1L PE=1 SV=3	Q15070	1	2
	Eukaryotic translation initiation factor 4 gamma 1 OS=Homo sapiens GN=EIF4G1 PE=1 SV=4	Q04637	2	2
	FK506-binding protein 15 OS=Homo sapiens GN=FKBP15 PE=1 SV=2	Q5T1M5		2
	Mitogen-activated protein kinase kinase kinase kinase 5 OS=Homo sapiens GN=MAP4K5 PE=1 SV=1	Q9Y4K4	1	2
	Centrosome-associated protein 350 OS=Homo sapiens GN=CEP350 PE=1 SV=1	Q5VT06	2	2
	Mitogen-activated protein kinase 13 OS=Homo sapiens GN=MAPK13 PE=1 SV=1	O15264		2
	39S ribosomal protein L18, mitochondrial OS=Homo sapiens GN=MRPL18 PE=1 SV=1	Q9H0U6		2
	Cadherin EGF LAG seven-pass G-type receptor 2 OS=Homo sapiens GN=CELSR2 PE=2 SV=1	Q9HCU4	4	2
	Cerberus OS=Homo sapiens GN=CER1 PE=1 SV=1	O95813		2
	Cadherin EGF LAG seven-pass G-type receptor 1 OS=Homo sapiens GN=CELSR1 PE=1 SV=1	Q9NYQ6	3	2
	Microtubule-associated protein RP/EB family member 3 OS=Homo sapiens GN=MAPRE3 PE=1 SV=1	Q9UPY8		2
	AP-2 complex subunit beta OS=Homo sapiens GN=AP2B1 PE=1 SV=1	P63010		2
	Clathrin heavy chain 2 OS=Homo sapiens GN=CLTCL1 PE=1 SV=2	P53675	2	2
	Anoctamin-8 OS=Homo sapiens GN=ANO8 PE=2 SV=3	Q9HCE9	2	2
	Formin-2 OS=Homo sapiens GN=FMN2 PE=1 SV=4	Q9NZ56	1	2
	DnaJ homolog subfamily A member 3, mitochondrial OS=Homo sapiens GN=DNAJA3 PE=1 SV=2	Q96EY1	2	2
	Formin-like protein 1 OS=Homo sapiens GN=FMNL1 PE=1 SV=3	O95466	1	2
	C-Jun-amino-terminal kinase-interacting protein 4 OS=Homo sapiens GN=SPAG9 PE=1 SV=4	O60271		2
	3-oxoacyl-[acyl-carrier-protein] synthase, mitochondrial OS=Homo sapiens GN=OXSM PE=1 SV=1	Q9NWU1	1	2
	Argininosuccinate synthase (Fragment) OS=Homo sapiens GN=ASS1 PE=2 SV=1	Q5T6L7	2	2
	40S ribosomal protein S11 OS=Homo sapiens GN=RPS11 PE=1 SV=3	P62280	2	2
	3-ketoacyl-CoA thiolase, peroxisomal OS=Homo sapiens GN=ACAA1 PE=1 SV=2	P09110		2
	Clathrin coat assembly protein AP180 OS=Homo sapiens GN=SNAP91 PE=1 SV=2	O60641		2
	BTB/POZ domain-containing protein KCTD11 OS=Homo sapiens GN=KCTD11 PE=1 SV=1	Q693B1	1	2
	Metabotropic glutamate receptor 3 OS=Homo sapiens GN=GRM3 PE=1 SV=2	Q14832		2
	60S ribosomal protein L18a OS=Homo sapiens GN=RPL18A PE=1 SV=2	Q02543	1	2
	Clathrin interactor 1 OS=Homo sapiens GN=CLINT1 PE=1 SV=1	Q14677	1	2
	KN motif and ankyrin repeat domain-containing protein 2 OS=Homo sapiens GN=KANK2 PE=1 SV=1	Q63ZY3		2
	Hemicentin-2 OS=Homo sapiens GN=HMCN2 PE=2 SV=2	Q8NDA2		2
	Brother of CDO OS=Homo sapiens GN=BOC PE=1 SV=1	Q9BWV1		2
	Membrane-associated phosphatidylinositol transfer protein 3 OS=Homo sapiens GN=PITPNM3 PE=1 SV=2	Q9BZ71	2	2
	Membrane-associated phosphatidylinositol transfer protein 2 OS=Homo sapiens GN=PITPNM2 PE=1 SV=1	Q9BZ72	1	2
	Four and a half LIM domains protein 3 OS=Homo sapiens GN=FHL3 PE=1 SV=4	Q13643	4	2
	3-hydroxyisobutyrate dehydrogenase, mitochondrial OS=Homo sapiens GN=HIBADH PE=1 SV=2	P31937		2
	Arf-GAP with GTPase, ANK repeat and PH domain-containing protein 10 OS=Homo sapiens GN=AGAP10 PE=2 SV=3	Q5T2P9	1	2
	Microtubule-associated protein 4 OS=Homo sapiens GN=MAP4 PE=1 SV=3	P27816	5	2
	Microtubule-associated protein 2 OS=Homo sapiens GN=MAP2 PE=1 SV=4	P11137		2
	Heparan sulfate glucosamine 3-O-sulfotransferase 6 OS=Homo sapiens GN=HS3ST6 PE=1 SV=2	Q96QI5		2
	Chromatin target of PRMT1 protein OS=Homo sapiens GN=CHTOP PE=1 SV=2	Q9Y3Y2		2
	Microprocessor complex subunit DGCR8 OS=Homo sapiens GN=DGCR8 PE=1 SV=1	Q8WYQ5	5	2
	Forkhead box protein L2 OS=Homo sapiens GN=FOXL2 PE=1 SV=1	P58012	1	2
	MHC class II regulatory factor RFX1 OS=Homo sapiens GN=RFX1 PE=1 SV=2	P22670		2
	Methionine synthase OS=Homo sapiens GN=MTR PE=1 SV=2	Q99707	2	2
	DnaJ homolog subfamily A member 4 OS=Homo sapiens GN=DNAJA4 PE=1 SV=1	Q8WW22		2
	39S ribosomal protein L47, mitochondrial OS=Homo sapiens GN=MRPL47 PE=1 SV=2	Q9HD33	3	2
	Alpha-1,2-mannosyltransferase ALG9 OS=Homo sapiens GN=ALG9 PE=1 SV=2	Q9H6U8		2
	Annexin A6 OS=Homo sapiens GN=ANXA6 PE=1 SV=3	P08133	1	2
	Chromosome 9 open reading frame 84 OS=Homo sapiens GN=C9orf84 PE=4 SV=1	A2A2V3	4	2
	Chromosome transmission fidelity protein 18 homolog OS=Homo sapiens GN=CHTF18 PE=1 SV=1	Q8WVB6	1	2
	Methylcytosine dioxygenase TET1 OS=Homo sapiens GN=TET1 PE=1 SV=2	Q8NFU7		2
	Methyl-CpG-binding protein 2 OS=Homo sapiens GN=MECP2 PE=1 SV=1	P51608		2
	Methyl-CpG-binding domain protein 6 OS=Homo sapiens GN=MBD6 PE=2 SV=2	Q96DN6		2
	Methyl-CpG-binding domain protein 4 OS=Homo sapiens GN=MBD4 PE=1 SV=1	O95243	1	2
	Chromodomain-helicase-DNA-binding protein 7 OS=Homo sapiens GN=CHD7 PE=1 SV=3	Q9P2D1	1	2
	2,4-dienoyl-CoA reductase, mitochondrial OS=Homo sapiens GN=DECR1 PE=1 SV=1	Q16698	4	2
	F-box only protein 38 OS=Homo sapiens GN=FBXO38 PE=1 SV=3	Q6PIJ6	2	2
	NACHT, LRR and PYD domains-containing protein 11 OS=Homo sapiens GN=NLRP11 PE=2 SV=2	P59045		2
	Apoptosis-stimulating of p53 protein 1 OS=Homo sapiens GN=PPP1R13B PE=1 SV=3	Q96KQ4		2
	N-acetyltransferase 10 OS=Homo sapiens GN=NAT10 PE=1 SV=2	Q9H0A0	2	2
	Carboxypeptidase D OS=Homo sapiens GN=CPD PE=1 SV=2	O75976	5	2
	F-box/LRR-repeat protein 19 OS=Homo sapiens GN=FBXL19 PE=1 SV=3	Q6PCT2		2
	N-acetylglutamate synthase, mitochondrial OS=Homo sapiens GN=NAGS PE=1 SV=1	Q8N159		2
	Fibronectin type III domain-containing protein 1 OS=Homo sapiens GN=FNDC1 PE=1 SV=4	Q4ZHG4		2
	FACT complex subunit SPT16 OS=Homo sapiens GN=SUPT16H PE=1 SV=1	Q9Y5B9		2
	Hepatocyte nuclear factor 3-alpha OS=Homo sapiens GN=FOXA1 PE=1 SV=2	P55317	1	2
	F-box/SPRY domain-containing protein 1 OS=Homo sapiens GN=FBXO45 PE=1 SV=1	P0C2W1	1	2
	25-hydroxyvitamin D-1 alpha hydroxylase, mitochondrial OS=Homo sapiens GN=CYP27B1 PE=1 SV=1	O15528	1	2
	ATP-dependent RNA helicase SUPV3L1, mitochondrial OS=Homo sapiens GN=SUPV3L1 PE=1 SV=1	Q8IYB8		2
	Myotubularin-related protein 7 OS=Homo sapiens GN=MTMR7 PE=1 SV=3	Q9Y216	3	2
	Casein kinase II subunit alpha' OS=Homo sapiens GN=CSNK2A2 PE=1 SV=1	P19784	2	2
	Myotubularin-related protein 5 OS=Homo sapiens GN=SBF1 PE=1 SV=3	O95248		2
	Myotubularin-related protein 1 OS=Homo sapiens GN=MTMR1 PE=1 SV=4	Q13613	1	2
	Calcium-dependent secretion activator 2 OS=Homo sapiens GN=CADPS2 PE=1 SV=2	Q86UW7	3	2
	N-acetyl-D-glucosamine kinase OS=Homo sapiens GN=NAGK PE=1 SV=4	Q9UJ70	2	2
	cAMP-specific 3',5'-cyclic phosphodiesterase 4A OS=Homo sapiens GN=PDE4A PE=1 SV=3	P27815	2	2
	Calpain-1 catalytic subunit OS=Homo sapiens GN=CAPN1 PE=1 SV=1	P07384	1	2
	Calpain-13 OS=Homo sapiens GN=CAPN13 PE=1 SV=2	Q6MZZ7	3	2
	Calpain-15 OS=Homo sapiens GN=SOLH PE=1 SV=1	O75808	1	2
	Fascin-2 OS=Homo sapiens GN=FSCN2 PE=4 SV=2	A8MRA6		2
	NEDD4-binding protein 3 OS=Homo sapiens GN=N4BP3 PE=1 SV=3	O15049		2
	Calpain-7 OS=Homo sapiens GN=CAPN7 PE=1 SV=1	Q9Y6W3	1	2
	Apolipoprotein(a) OS=Homo sapiens GN=LPA PE=1 SV=1	P08519	1	2
	Nck-associated protein 5 OS=Homo sapiens GN=NCKAP5 PE=2 SV=2	O14513	2	2
	NACHT, LRR and PYD domains-containing protein 9 OS=Homo sapiens GN=NLRP9 PE=2 SV=1	Q7RTR0		2
	HERV-K_11q22.1 provirus ancestral Pol protein OS=Homo sapiens PE=3 SV=1	P63136	1	2
	F-box only protein 32 OS=Homo sapiens GN=FBXO32 PE=1 SV=1	Q969P5		2
	Fanconi anemia-associated protein of 100 kDa OS=Homo sapiens GN=FAAP100 PE=1 SV=3	Q0VG06	1	2
	Dolichyl-diphosphooligosaccharide--protein glycosyltransferase subunit 1 OS=Homo sapiens GN=RPN1 PE=1 SV=1	P04843	1	2
	Fanconi anemia group I protein OS=Homo sapiens GN=FANCI PE=1 SV=4	Q9NVI1		2
	HERV-K_3q12.3 provirus ancestral Gag polyprotein OS=Homo sapiens GN=ERVK-5 PE=1 SV=3	Q9HDB9		2
	CAP-Gly domain-containing linker protein 4 OS=Homo sapiens GN=CLIP4 PE=1 SV=1	Q8N3C7	1	2
	ATP-dependent RNA helicase DHX29 OS=Homo sapiens GN=DHX29 PE=1 SV=2	Q7Z478	2	2
	Caprin-2 OS=Homo sapiens GN=CAPRIN2 PE=1 SV=1	Q6IMN6	2	2
	26S protease regulatory subunit 8 (Fragment) OS=Homo sapiens GN=PSMC5 PE=4 SV=1	J3QRR3		2
	182 kDa tankyrase-1-binding protein OS=Homo sapiens GN=TNKS1BP1 PE=1 SV=4	Q9C0C2	2	2
	Multimerin-1 OS=Homo sapiens GN=MMRN1 PE=1 SV=3	Q13201		2
	Myosin-binding protein H-like OS=Homo sapiens GN=MYBPHL PE=2 SV=2	A2RUH7	1	2
	Exosome component 10 OS=Homo sapiens GN=EXOSC10 PE=1 SV=2	Q01780		2
	CCR4-NOT transcription complex subunit 2 OS=Homo sapiens GN=CNOT2 PE=1 SV=1	Q9NZN8		2
	Exosome complex component RRP43 OS=Homo sapiens GN=EXOSC8 PE=1 SV=1	Q96B26	1	2
	MutS protein homolog 5 OS=Homo sapiens GN=MSH5 PE=1 SV=1	O43196		2
	Fibrillin-1 OS=Homo sapiens GN=FBN1 PE=1 SV=3	P35555		2
	Cdc42-interacting protein 4 OS=Homo sapiens GN=TRIP10 PE=1 SV=3	Q15642	1	2
	28S ribosomal protein S2, mitochondrial OS=Homo sapiens GN=MRPS2 PE=1 SV=1	Q9Y399	2	2
	CCAAT/enhancer-binding protein delta OS=Homo sapiens GN=CEBPD PE=1 SV=2	P49716	1	2
	Exosome complex component MTR3 OS=Homo sapiens GN=EXOSC6 PE=1 SV=1	Q5RKV6		2
	Exportin-2 OS=Homo sapiens GN=CSE1L PE=1 SV=3	P55060	5	2
	Exophilin-5 OS=Homo sapiens GN=EXPH5 PE=1 SV=3	Q8NEV8	1	2
	Mucin-5AC (Fragments) OS=Homo sapiens GN=MUC5AC PE=1 SV=3	P98088	1	2
	Exocyst complex component 8 OS=Homo sapiens GN=EXOC8 PE=1 SV=2	Q8IYI6	1	2
	28S ribosomal protein S28, mitochondrial OS=Homo sapiens GN=MRPS28 PE=1 SV=1	Q9Y2Q9	3	2
	Exocyst complex component 2 OS=Homo sapiens GN=EXOC2 PE=1 SV=1	Q96KP1		2
	mTERF domain-containing protein 3, mitochondrial OS=Homo sapiens GN=MTERFD3 PE=1 SV=2	Q49AM1		2
	AP-3 complex subunit delta-1 OS=Homo sapiens GN=AP3D1 PE=4 SV=1	G5E988	4	2
	mRNA cap guanine-N7 methyltransferase OS=Homo sapiens GN=RNMT PE=1 SV=1	O43148		2
	28S ribosomal protein S22, mitochondrial OS=Homo sapiens GN=MRPS22 PE=1 SV=1	P82650	2	2
	Myomesin-2 OS=Homo sapiens GN=MYOM2 PE=1 SV=2	P54296	1	2
	Claudin domain-containing protein 1 (Fragment) OS=Homo sapiens GN=CLDND1 PE=4 SV=1	H0Y8T9	2	2
	26S protease regulatory subunit 8 OS=Homo sapiens GN=PSMC5 PE=1 SV=1	P62195	5	2
	FCH domain only protein 2 OS=Homo sapiens GN=FCHO2 PE=1 SV=2	Q0JRZ9	1	2
	Caspase-14 OS=Homo sapiens GN=CASP14 PE=1 SV=2	P31944	3	2
	Fer-1-like protein 5 OS=Homo sapiens GN=FER1L5 PE=2 SV=2	A0AVI2		2
	Caspase-6 OS=Homo sapiens GN=CASP6 PE=1 SV=2	P55212	1	2
	FERM and PDZ domain-containing protein 1 OS=Homo sapiens GN=FRMPD1 PE=1 SV=1	Q5SYB0		2
	26S proteasome non-ATPase regulatory subunit 13 OS=Homo sapiens GN=PSMD13 PE=1 SV=2	Q9UNM6	1	2
	ATP-sensitive inward rectifier potassium channel 12 OS=Homo sapiens GN=KCNJ12 PE=1 SV=2	Q14500		2
	FERM and PDZ domain-containing protein 3 OS=Homo sapiens GN=FRMPD3 PE=2 SV=2	Q5JV73	1	2
	26S protease regulatory subunit 7 OS=Homo sapiens GN=PSMC2 PE=1 SV=3	P35998	7	2
	Myomesin-1 OS=Homo sapiens GN=MYOM1 PE=1 SV=2	P52179	1	2
	Myoferlin OS=Homo sapiens GN=MYOF PE=1 SV=1	Q9NZM1		2
	26S proteasome non-ATPase regulatory subunit 3 OS=Homo sapiens GN=PSMD3 PE=1 SV=2	O43242	2	2
	MyoD family inhibitor domain-containing protein OS=Homo sapiens GN=MDFIC PE=1 SV=2	Q9P1T7		2
	Cathepsin S OS=Homo sapiens GN=CTSS PE=1 SV=3	P25774		2
	Calcium-binding mitochondrial carrier protein SCaMC-3 OS=Homo sapiens GN=SLC25A23 PE=1 SV=2	Q9BV35		2
	FERM domain-containing protein 4A OS=Homo sapiens GN=FRMD4A PE=1 SV=3	Q9P2Q2		2
	Exportin-6 OS=Homo sapiens GN=XPO6 PE=1 SV=1	Q96QU8		2
	Heterogeneous nuclear ribonucleoprotein D0 OS=Homo sapiens GN=HNRNPD PE=2 SV=1	B4DTC3		2
	BMP-2-inducible protein kinase OS=Homo sapiens GN=BMP2K PE=1 SV=2	Q9NSY1		2
	Histone-lysine N-methyltransferase MLL2 OS=Homo sapiens GN=MLL2 PE=1 SV=2	O14686	1	2
	AT-rich interactive domain-containing protein 1B OS=Homo sapiens GN=ARID1B PE=1 SV=2	Q8NFD5	2	2
	Histone-lysine N-methyltransferase SETDB1 OS=Homo sapiens GN=SETDB1 PE=1 SV=1	Q15047	2	2
	Bone morphogenetic protein 2 OS=Homo sapiens GN=BMP2 PE=1 SV=1	P12643		2
	Collagen alpha-1(XXIII) chain OS=Homo sapiens GN=COL23A1 PE=2 SV=1	Q86Y22	2	2
	Collagen alpha-1(XXIV) chain OS=Homo sapiens GN=COL24A1 PE=2 SV=2	Q17RW2	3	2
	Collagen alpha-1(XXV) chain OS=Homo sapiens GN=COL25A1 PE=1 SV=2	Q9BXS0	1	2
	Leucine-rich repeat-containing protein 8E OS=Homo sapiens GN=LRRC8E PE=2 SV=2	Q6NSJ5		2
	Collagen alpha-1(VI) chain OS=Homo sapiens GN=COL6A1 PE=1 SV=3	P12109		2
	DNA topoisomerase 1 OS=Homo sapiens GN=TOP1 PE=1 SV=2	P11387		2
	Collagen alpha-1(IX) chain OS=Homo sapiens GN=COL9A1 PE=1 SV=3	P20849		2
	Collagen alpha-3(IV) chain OS=Homo sapiens GN=COL4A3 PE=1 SV=3	Q01955	1	2
	Gem-associated protein 5 OS=Homo sapiens GN=GEMIN5 PE=1 SV=3	Q8TEQ6	3	2
	Collagen alpha-4(IV) chain OS=Homo sapiens GN=COL4A4 PE=1 SV=3	P53420	1	2
	Collagen alpha-5(IV) chain OS=Homo sapiens GN=COL4A5 PE=1 SV=2	P29400	6	2
	Ankyrin repeat domain-containing protein 13B OS=Homo sapiens GN=ANKRD13B PE=2 SV=4	Q86YJ7		2
	HLA class I histocompatibility antigen, A-1 alpha chain OS=Homo sapiens GN=HLA-A PE=1 SV=1	P30443	3	2
	80 kDa MCM3-associated protein OS=Homo sapiens GN=MCM3AP PE=1 SV=2	O60318		2
	Leucine-rich repeat-containing protein 17 OS=Homo sapiens GN=LRRC17 PE=2 SV=1	Q8N6Y2		2
	6-phosphofructokinase type C OS=Homo sapiens GN=PFKP PE=1 SV=2	Q01813	3	2
	Histone-lysine N-methyltransferase PRDM9 OS=Homo sapiens GN=PRDM9 PE=2 SV=2	Q9NQV7		2
	Coiled-coil domain-containing protein 81 OS=Homo sapiens GN=CCDC81 PE=2 SV=2	Q6ZN84		2
	Coiled-coil domain-containing protein 82 OS=Homo sapiens GN=CCDC82 PE=1 SV=2	Q8N4S0		2
	Membrane-associated guanylate kinase, WW and PDZ domain-containing protein 3 OS=Homo sapiens GN=MAGI3 PE=1 SV=2	Q5TCQ9		2
	Coiled-coil domain-containing protein 91 OS=Homo sapiens GN=CCDC91 PE=1 SV=2	Q7Z6B0		2
	Brain and acute leukemia cytoplasmic protein OS=Homo sapiens GN=BAALC PE=2 SV=3	Q8WXS3		2
	Leucine-rich repeat neuronal protein 3 OS=Homo sapiens GN=LRRN3 PE=2 SV=1	Q9H3W5		2
	60S ribosomal protein L18 OS=Homo sapiens GN=RPL18 PE=1 SV=2	Q07020	2	2
	Disintegrin and metalloproteinase domain-containing protein 33 OS=Homo sapiens GN=ADAM33 PE=1 SV=2	Q9BZ11	1	2
	60S ribosomal protein L35 OS=Homo sapiens GN=RPL35 PE=1 SV=2	P42766	2	2
	Ankyrin repeat domain-containing protein 26 OS=Homo sapiens GN=ANKRD26 PE=1 SV=3	Q9UPS8	2	2
	Ankyrin repeat domain-containing protein 11 OS=Homo sapiens GN=ANKRD11 PE=1 SV=3	Q6UB99	1	2
	Histone-lysine N-methyltransferase SETD1A OS=Homo sapiens GN=SETD1A PE=1 SV=3	O15047		2
	60S ribosomal protein L23 OS=Homo sapiens GN=RPL23 PE=1 SV=1	P62829		2
	Liprin-alpha-1 (Fragment) OS=Homo sapiens GN=PPFIA1 PE=4 SV=1	H0YDZ8	4	2
	Lipoxygenase homology domain-containing protein 1 OS=Homo sapiens GN=LOXHD1 PE=4 SV=2	H7BZ41		2
	Gastrin OS=Homo sapiens GN=GAST PE=1 SV=1	P01350		2
	60S ribosomal protein L26 OS=Homo sapiens GN=RPL26 PE=1 SV=1	P61254	2	2
	Lipolysis-stimulated lipoprotein receptor OS=Homo sapiens GN=LSR PE=1 SV=4	Q86X29		2
	60S ribosomal protein L27a OS=Homo sapiens GN=RPL27A PE=1 SV=2	P46776	1	2
	Histone-lysine N-methyltransferase MLL4 OS=Homo sapiens GN=WBP7 PE=1 SV=1	Q9UMN6	1	2
	Beta-secretase 1 OS=Homo sapiens GN=BACE1 PE=1 SV=2	P56817		2
	Abhydrolase domain-containing protein 2 (Fragment) OS=Homo sapiens GN=ABHD2 PE=4 SV=1	H3BN19	2	2
	L-aminoadipate-semialdehyde dehydrogenase-phosphopantetheinyl transferase OS=Homo sapiens GN=AASDHPPT PE=1 SV=2	Q9NRN7	3	2
	Electrogenic sodium bicarbonate cotransporter 4 OS=Homo sapiens GN=SLC4A5 PE=2 SV=2	Q9BY07	1	2
	Laminin subunit beta-1 OS=Homo sapiens GN=LAMB1 PE=1 SV=2	P07942	3	2
	Dual serine/threonine and tyrosine protein kinase OS=Homo sapiens GN=DSTYK PE=4 SV=1	C9J9G6	3	2
	ELAV-like protein 1 OS=Homo sapiens GN=ELAVL1 PE=1 SV=2	Q15717		2
	EH domain-containing protein 4 OS=Homo sapiens GN=EHD4 PE=1 SV=1	Q9H223		2
	Ankyrin repeat and SAM domain-containing protein 4B OS=Homo sapiens GN=ANKS4B PE=2 SV=2	Q8N8V4		2
	A disintegrin and metalloproteinase with thrombospondin motifs 12 OS=Homo sapiens GN=ADAMTS12 PE=1 SV=2	P58397		2
	EH domain-binding protein 1-like protein 1 OS=Homo sapiens GN=EHBP1L1 PE=1 SV=2	Q8N3D4	3	2
	Large neutral amino acids transporter small subunit 1 OS=Homo sapiens GN=SLC7A5 PE=1 SV=2	Q01650		2
	Ladinin-1 OS=Homo sapiens GN=LAD1 PE=1 SV=2	O00515	1	2
	Coronin-7 OS=Homo sapiens GN=CORO7 PE=1 SV=2	P57737		2
	Glutamate receptor 1 OS=Homo sapiens GN=GRIA1 PE=1 SV=2	P42261		2
	Egl nine homolog 1 OS=Homo sapiens GN=EGLN1 PE=1 SV=1	Q9GZT9		2
	EF-hand domain-containing protein KIAA0494 OS=Homo sapiens GN=KIAA0494 PE=1 SV=1	O75071		2
	Ankyrin repeat and MYND domain-containing protein 2 OS=Homo sapiens GN=ANKMY2 PE=1 SV=1	Q8IV38	1	2
	Beta-defensin 4A OS=Homo sapiens GN=DEFB4A PE=1 SV=1	O15263		2
	Cryptochrome-1 OS=Homo sapiens GN=CRY1 PE=1 SV=1	Q16526	1	2
	Glutamate [NMDA] receptor subunit zeta-1 OS=Homo sapiens GN=GRIN1 PE=1 SV=1	Q05586		2
	Ankyrin repeat and SOCS box protein 18 (Fragment) OS=Homo sapiens GN=ASB18 PE=4 SV=1	C9JFL4	1	2
	Low-density lipoprotein receptor-related protein 2 OS=Homo sapiens GN=LRP2 PE=1 SV=3	P98164	1	2
	Elongator complex protein 4 OS=Homo sapiens GN=ELP4 PE=1 SV=2	Q96EB1	3	2
	Complement C3 OS=Homo sapiens GN=C3 PE=1 SV=2	P01024		2
	Complement component 1 Q subcomponent-binding protein, mitochondrial OS=Homo sapiens GN=C1QBP PE=1 SV=1	Q07021		2
	Leucine-rich repeat flightless-interacting protein 1 OS=Homo sapiens GN=LRRFIP1 PE=4 SV=1	E9PGZ2	1	2
	Complement component C8 gamma chain OS=Homo sapiens GN=C8G PE=1 SV=3	P07360	1	2
	Complex I intermediate-associated protein 30, mitochondrial OS=Homo sapiens GN=NDUFAF1 PE=1 SV=2	Q9Y375		2
	Leucine zipper protein 1 OS=Homo sapiens GN=LUZP1 PE=1 SV=2	Q86V48	1	2
	COP9 signalosome complex subunit 2 OS=Homo sapiens GN=COPS2 PE=1 SV=1	P61201		2
	Glioma tumor suppressor candidate region gene 2 protein OS=Homo sapiens GN=GLTSCR2 PE=1 SV=2	Q9NZM5		2
	La-related protein 4 OS=Homo sapiens GN=LARP4 PE=1 SV=3	Q71RC2		2
	Leiomodin-3 OS=Homo sapiens GN=LMOD3 PE=2 SV=1	Q0VAK6		2
	HLA class I histocompatibility antigen, B-58 alpha chain OS=Homo sapiens GN=HLA-B PE=2 SV=1	P10319		2
	Conserved oligomeric Golgi complex subunit 7 OS=Homo sapiens GN=COG7 PE=1 SV=1	P83436	1	2
	Latent-transforming growth factor beta-binding protein 2 OS=Homo sapiens GN=LTBP2 PE=1 SV=3	Q14767	1	2
	Constitutive coactivator of PPAR-gamma-like protein 1 OS=Homo sapiens GN=FAM120A PE=1 SV=2	Q9NZB2	1	2
	Glucosamine-6-phosphate isomerase 2 OS=Homo sapiens GN=GNPDA2 PE=1 SV=1	Q8TDQ7		2
	Large neutral amino acids transporter small subunit 2 OS=Homo sapiens GN=SLC7A8 PE=1 SV=1	Q9UHI5	1	2
	DNA replication ATP-dependent helicase/nuclease DNA2 OS=Homo sapiens GN=DNA2 PE=1 SV=3	P51530		2
	General transcription factor 3C polypeptide 1 OS=Homo sapiens GN=GTF3C1 PE=1 SV=4	Q12789	2	2
	Leucine rich adaptor protein 1 OS=Homo sapiens GN=LURAP1 PE=1 SV=1	Q96LR2		2
	Ankyrin repeat domain-containing protein SOWAHB OS=Homo sapiens GN=SOWAHB PE=2 SV=1	A6NEL2		2
	Epidermal growth factor receptor substrate 15 OS=Homo sapiens GN=EPS15 PE=1 SV=2	P42566		2
	Fumarate hydratase, mitochondrial OS=Homo sapiens GN=FH PE=1 SV=3	P07954		2
	Atrial natriuretic peptide receptor 3 OS=Homo sapiens GN=NPR3 PE=1 SV=2	P17342		2
	Matrilin-4 OS=Homo sapiens GN=MATN4 PE=1 SV=3	O95460		2
	Coatomer subunit beta' OS=Homo sapiens GN=COPB2 PE=1 SV=2	P35606	1	2
	Coatomer subunit delta OS=Homo sapiens GN=ARCN1 PE=1 SV=1	P48444	2	2
	Mastermind-like protein 2 OS=Homo sapiens GN=MAML2 PE=1 SV=2	Q8IZL2		2
	Helicase SRCAP OS=Homo sapiens GN=SRCAP PE=1 SV=3	Q6ZRS2	1	2
	Ephrin-B3 OS=Homo sapiens GN=EFNB3 PE=1 SV=1	Q15768		2
	Mediator of RNA polymerase II transcription subunit 13 OS=Homo sapiens GN=MED13 PE=1 SV=3	Q9UHV7	1	2
	Bromo adjacent homology domain-containing 1 protein OS=Homo sapiens GN=BAHD1 PE=1 SV=2	Q8TBE0		2
	G patch domain-containing protein 1 OS=Homo sapiens GN=GPATCH1 PE=1 SV=1	Q9BRR8		2
	DNA-directed RNA polymerase II subunit RPB2 OS=Homo sapiens GN=POLR2B PE=1 SV=1	P30876	8	2
	G protein-regulated inducer of neurite outgrowth 3 OS=Homo sapiens GN=GPRIN3 PE=2 SV=2	Q6ZVF9	1	2
	Histone-lysine N-methyltransferase MLL OS=Homo sapiens GN=MLL PE=1 SV=5	Q03164	5	2
	DNA-directed RNA polymerase I subunit RPA2 OS=Homo sapiens GN=POLR1B PE=1 SV=2	Q9H9Y6	2	2
	G2/mitotic-specific cyclin-B1 OS=Homo sapiens GN=CCNB1 PE=1 SV=1	P14635	3	2
	MAGUK p55 subfamily member 6 OS=Homo sapiens GN=MPP6 PE=1 SV=2	Q9NZW5		2
	FYVE and coiled-coil domain-containing protein 1 OS=Homo sapiens GN=FYCO1 PE=1 SV=3	Q9BQS8	1	2
	DNA-directed RNA polymerase, mitochondrial OS=Homo sapiens GN=POLRMT PE=1 SV=2	O00411	1	2
	Membrane-associated guanylate kinase, WW and PDZ domain-containing protein 2 OS=Homo sapiens GN=MAGI2 PE=1 SV=3	Q86UL8		2
	40S ribosomal protein S24 OS=Homo sapiens GN=RPS24 PE=1 SV=1	P62847		2
	Fragile X mental retardation syndrome-related protein 1 OS=Homo sapiens GN=FXR1 PE=1 SV=3	P51114		2
	Cleavage and polyadenylation specificity factor subunit 6 OS=Homo sapiens GN=CPSF6 PE=1 SV=2	Q16630	6	2
	Melanoma-associated antigen D4 OS=Homo sapiens GN=MAGED4 PE=1 SV=3	Q96JG8		2
	Melanoma-associated antigen C1 OS=Homo sapiens GN=MAGEC1 PE=1 SV=3	O60732		2
	FRAS1-related extracellular matrix protein 2 OS=Homo sapiens GN=FREM2 PE=1 SV=2	Q5SZK8	2	2
	Melanoma-associated antigen B2 OS=Homo sapiens GN=MAGEB2 PE=1 SV=3	O15479		2
	Max-interacting protein 1 OS=Homo sapiens GN=MXI1 PE=1 SV=2	P50539		2
	Melanoma antigen recognized by T-cells 1 OS=Homo sapiens GN=MLANA PE=1 SV=1	Q16655	1	2
	Coagulation factor V OS=Homo sapiens GN=F5 PE=1 SV=4	P12259		2
	Frizzled-10 OS=Homo sapiens GN=FZD10 PE=4 SV=1	F5H450	1	2
	Meiotic recombination protein SPO11 OS=Homo sapiens GN=SPO11 PE=2 SV=1	Q9Y5K1		2
	CLIP-associating protein 2 OS=Homo sapiens GN=CLASP2 PE=1 SV=2	O75122		2
	Histone deacetylase 4 OS=Homo sapiens GN=HDAC4 PE=1 SV=3	P56524		2
	Ankyrin-2 OS=Homo sapiens GN=ANK2 PE=1 SV=4	Q01484	2	2
	Mediator of RNA polymerase II transcription subunit 14 OS=Homo sapiens GN=MED14 PE=1 SV=2	O60244		2
	Epididymis-specific alpha-mannosidase OS=Homo sapiens GN=MAN2B2 PE=1 SV=4	Q9Y2E5		2
	BRISC and BRCA1-A complex member 1 OS=Homo sapiens GN=BABAM1 PE=1 SV=1	Q9NWV8	1	2
	Melanoma inhibitory activity protein 3 OS=Homo sapiens GN=MIA3 PE=1 SV=1	Q5JRA6	1	2
	60 kDa SS-A/Ro ribonucleoprotein OS=Homo sapiens GN=TROVE2 PE=1 SV=2	P10155		2
	Ankyrin repeat domain-containing protein 36A OS=Homo sapiens GN=ANKRD36 PE=2 SV=3	A6QL64	2	2
	Enhancer of polycomb homolog 1 OS=Homo sapiens GN=EPC1 PE=1 SV=1	Q9H2F5	2	2
	Galactocerebrosidase OS=Homo sapiens GN=GALC PE=1 SV=2	P54803	1	2
	Enhancer of mRNA-decapping protein 4 OS=Homo sapiens GN=EDC4 PE=1 SV=1	Q6P2E9	1	2
	Ephrin type-A receptor 2 OS=Homo sapiens GN=EPHA2 PE=1 SV=2	P29317	1	2
	Histone H2B type 1-A OS=Homo sapiens GN=HIST1H2BA PE=1 SV=3	Q96A08	1	2
	BRCA1-A complex subunit RAP80 OS=Homo sapiens GN=UIMC1 PE=1 SV=2	Q96RL1		2
	Coiled-coil domain-containing protein 168 OS=Homo sapiens GN=CCDC168 PE=2 SV=2	Q8NDH2	1	2
	Lysine-specific demethylase 3B OS=Homo sapiens GN=KDM3B PE=1 SV=2	Q7LBC6	2	2
	Gamma-adducin OS=Homo sapiens GN=ADD3 PE=1 SV=1	Q9UEY8		2
	Coiled-coil domain-containing protein 57 OS=Homo sapiens GN=CCDC57 PE=2 SV=2	Q2TAC2	1	2
	Heat shock protein HSP 90-alpha OS=Homo sapiens GN=HSP90AA1 PE=1 SV=5	P07900	5	2
	Heat shock protein beta-8 OS=Homo sapiens GN=HSPB8 PE=1 SV=1	Q9UJY1		2
	AT-rich interactive domain-containing protein 1A OS=Homo sapiens GN=ARID1A PE=1 SV=3	O14497	2	2
	Gamma-tubulin complex component 2 OS=Homo sapiens GN=TUBGCP2 PE=1 SV=2	Q9BSJ2	4	2
	Coiled-coil domain-containing protein 71L OS=Homo sapiens GN=CCDC71L PE=2 SV=2	Q8N9Z2		2
	Coiled-coil domain-containing protein 74A OS=Homo sapiens GN=CCDC74A PE=2 SV=1	Q96AQ1	7	2
	60S ribosomal protein L10 OS=Homo sapiens GN=RPL10 PE=1 SV=4	P27635		2
	Coiled-coil domain-containing protein 47 OS=Homo sapiens GN=CCDC47 PE=1 SV=1	Q96A33		2
	Coiled-coil domain-containing protein 144B OS=Homo sapiens GN=CCDC144B PE=2 SV=1	Q3MJ40	1	2
	Galectin-3-binding protein OS=Homo sapiens GN=LGALS3BP PE=1 SV=1	Q08380	3	2
	Lysyl oxidase homolog 4 OS=Homo sapiens GN=LOXL4 PE=1 SV=1	Q96JB6	1	2
	Histone H2A type 1-A OS=Homo sapiens GN=HIST1H2AA PE=1 SV=3	Q96QV6		2
	Coiled-coil domain-containing protein 144A OS=Homo sapiens GN=CCDC144A PE=1 SV=1	A2RUR9	1	2
	Breast carcinoma-amplified sequence 4 OS=Homo sapiens GN=BCAS4 PE=2 SV=1	Q8TDM0		2
	Breast carcinoma-amplified sequence 3 OS=Homo sapiens GN=BCAS3 PE=1 SV=3	Q9H6U6	1	2
	Macrophage receptor MARCO OS=Homo sapiens GN=MARCO PE=1 SV=1	Q9UEW3	3	2
	Galactose-3-O-sulfotransferase 3 OS=Homo sapiens GN=GAL3ST3 PE=1 SV=1	Q96A11	1	2
	BRCA1-associated RING domain protein 1 (Fragment) OS=Homo sapiens GN=BARD1 PE=4 SV=1	C9IYG1	1	2
	Protein shisa-2 homolog OS=Homo sapiens GN=SHISA2 PE=1 SV=1	Q6UWI4		2
	Protein Wnt-2b OS=Homo sapiens GN=WNT2B PE=1 SV=2	Q93097	2	2
	Transmembrane channel-like protein 2 OS=Homo sapiens GN=TMC2 PE=2 SV=3	Q8TDI7	1	2
	Transmembrane channel-like protein 3 OS=Homo sapiens GN=TMC3 PE=1 SV=3	Q7Z5M5		2
	Protocadherin alpha-8 OS=Homo sapiens GN=PCDHA8 PE=2 SV=1	Q9Y5H6		2
	Transducin-like enhancer protein 3 OS=Homo sapiens GN=TLE3 PE=1 SV=2	Q04726	1	2
	Protein SCO2 homolog, mitochondrial OS=Homo sapiens GN=SCO2 PE=1 SV=3	O43819		2
	Transcriptional regulator ATRX OS=Homo sapiens GN=ATRX PE=1 SV=5	P46100	2	2
	Transforming protein RhoA OS=Homo sapiens GN=RHOA PE=1 SV=1	P61586	2	2
	Transcriptional activator protein Pur-alpha OS=Homo sapiens GN=PURA PE=1 SV=2	Q00577		2
	Transcription factor Sp6 OS=Homo sapiens GN=SP6 PE=1 SV=1	Q3SY56		2
	Protein Wnt-9a OS=Homo sapiens GN=WNT9A PE=2 SV=2	O14904		2
	Transmembrane channel-like protein 6 OS=Homo sapiens GN=TMC6 PE=1 SV=2	Q7Z403		2
	Protein transport protein Sec16A OS=Homo sapiens GN=SEC16A PE=4 SV=1	J3KNL6	1	2
	Transient receptor potential cation channel subfamily V member 5 OS=Homo sapiens GN=TRPV5 PE=1 SV=2	Q9NQA5		2
	Nuclear autoantigen Sp-100 OS=Homo sapiens GN=SP100 PE=1 SV=3	P23497		2
	Translation initiation factor eIF-2B subunit epsilon OS=Homo sapiens GN=EIF2B5 PE=1 SV=3	Q13144	3	2
	Protocadherin Fat 2 OS=Homo sapiens GN=FAT2 PE=1 SV=2	Q9NYQ8	1	2
	Nuclear pore complex protein Nup155 OS=Homo sapiens GN=NUP155 PE=1 SV=1	O75694	4	2
	Protein SSXT OS=Homo sapiens GN=SS18 PE=1 SV=3	Q15532	3	2
	Protein sidekick-2 OS=Homo sapiens GN=SDK2 PE=1 SV=3	Q58EX2	1	2
	Nuclear cap-binding protein subunit 1 OS=Homo sapiens GN=NCBP1 PE=1 SV=1	Q09161	1	2
	Protocadherin Fat 3 OS=Homo sapiens GN=FAT3 PE=2 SV=2	Q8TDW7	3	2
	Protein-glutamine gamma-glutamyltransferase Z OS=Homo sapiens GN=TGM7 PE=2 SV=1	Q96PF1		2
	Transcription initiation factor TFIID subunit 1-like OS=Homo sapiens GN=TAF1L PE=1 SV=1	Q8IZX4		2
	Protein very KIND OS=Homo sapiens GN=KNDC1 PE=2 SV=2	Q76NI1	1	2
	Nuclear pore complex protein Nup133 OS=Homo sapiens GN=NUP133 PE=1 SV=2	Q8WUM0	1	2
	Protein-glutamine gamma-glutamyltransferase K OS=Homo sapiens GN=TGM1 PE=1 SV=4	P22735		2
	Transformation/transcription domain-associated protein OS=Homo sapiens GN=TRRAP PE=1 SV=3	Q9Y4A5	3	2
	Protein turtle homolog B OS=Homo sapiens GN=IGSF9B PE=2 SV=2	Q9UPX0	1	2
	Protein Shroom1 OS=Homo sapiens GN=SHROOM1 PE=1 SV=1	Q2M3G4		2
	Nuclear pore complex protein Nup153 OS=Homo sapiens GN=NUP153 PE=1 SV=2	P49790		2
	Transmembrane and TPR repeat-containing protein 2 OS=Homo sapiens GN=TMTC2 PE=2 SV=1	Q8N394		2
	Tropomyosin 3 OS=Homo sapiens GN=TPM3 PE=2 SV=1	Q5VU66	1	2
	Transcription intermediary factor 1-alpha OS=Homo sapiens GN=TRIM24 PE=1 SV=3	O15164		2
	Protein shisa-9 OS=Homo sapiens GN=SHISA9 PE=4 SV=1	H0YM01		2
	Protein TANC1 OS=Homo sapiens GN=TANC1 PE=1 SV=3	Q9C0D5	2	2
	Protein-tyrosine sulfotransferase 1 OS=Homo sapiens GN=TPST1 PE=2 SV=1	O60507		2
	Protein unc-13 homolog A OS=Homo sapiens GN=UNC13A PE=2 SV=4	Q9UPW8		2
	Protein FAM53A OS=Homo sapiens GN=FAM53A PE=2 SV=1	Q6NSI3		2
	Tumor protein p73 OS=Homo sapiens GN=TP73 PE=1 SV=1	O15350	1	2
	Tumor protein p53-inducible protein 13 OS=Homo sapiens GN=TP53I13 PE=2 SV=1	Q8NBR0		2
	Protein FAM13A OS=Homo sapiens GN=FAM13A PE=1 SV=2	O94988		2
	Tumor necrosis factor receptor superfamily member 8 OS=Homo sapiens GN=TNFRSF8 PE=1 SV=1	P28908		2
	Protein FAM187B OS=Homo sapiens GN=FAM187B PE=2 SV=2	Q17R55		2
	Protein FAM219B OS=Homo sapiens GN=FAM219B PE=1 SV=1	Q5XKK7		2
	Tudor domain-containing protein 6 OS=Homo sapiens GN=TDRD6 PE=2 SV=2	O60522	1	2
	Tudor domain-containing protein 3 OS=Homo sapiens GN=TDRD3 PE=1 SV=1	Q9H7E2		2
	Protein kinase C gamma type OS=Homo sapiens GN=PRKCG PE=1 SV=3	P05129	5	2
	Tubulin polyglutamylase TTLL7 OS=Homo sapiens GN=TTLL7 PE=2 SV=2	Q6ZT98		2
	Protein ENL OS=Homo sapiens GN=MLLT1 PE=1 SV=2	Q03111		2
	Tubulin polyglutamylase complex subunit 2 OS=Homo sapiens GN=TPGS2 PE=2 SV=2	Q68CL5		2
	Tubulin epsilon chain OS=Homo sapiens GN=TUBE1 PE=2 SV=1	Q9UJT0		2
	Nucleolar pre-ribosomal-associated protein 1 OS=Homo sapiens GN=URB1 PE=1 SV=4	O60287		2
	Tubulin beta chain OS=Homo sapiens GN=TUBB PE=1 SV=2	P07437	4	2
	Tubulin alpha chain-like 3 OS=Homo sapiens GN=TUBAL3 PE=1 SV=2	A6NHL2	1	2
	Protein FAM83C OS=Homo sapiens GN=FAM83C PE=1 SV=3	Q9BQN1	2	2
	Nuclear transcription factor Y subunit gamma OS=Homo sapiens GN=NFYC PE=1 SV=3	Q13952	1	2
	Zinc finger protein 280D OS=Homo sapiens GN=ZNF280D PE=1 SV=3	Q6N043	1	2
	Tudor domain-containing protein 12 OS=Homo sapiens GN=TDRD12 PE=2 SV=2	Q587J7		2
	U2 snRNP-associated SURP motif-containing protein (Fragment) OS=Homo sapiens GN=U2SURP PE=4 SV=1	H7C4P4	1	2
	Ubiquitin carboxyl-terminal hydrolase 24 OS=Homo sapiens GN=USP24 PE=1 SV=3	Q9UPU5	3	2
	Protein arginine N-methyltransferase 6 OS=Homo sapiens GN=PRMT6 PE=1 SV=1	Q96LA8	1	2
	Ubiquitin carboxyl-terminal hydrolase 10 OS=Homo sapiens GN=USP10 PE=1 SV=2	Q14694		2
	Zinc finger protein 142 OS=Homo sapiens GN=ZNF142 PE=1 SV=4	P52746		2
	Protein atonal homolog 8 OS=Homo sapiens GN=ATOH8 PE=2 SV=2	Q96SQ7		2
	Protein bassoon OS=Homo sapiens GN=BSN PE=1 SV=4	Q9UPA5	4	2
	U6 snRNA-associated Sm-like protein LSm5 OS=Homo sapiens GN=LSM5 PE=1 SV=3	Q9Y4Y9		2
	U5 small nuclear ribonucleoprotein 200 kDa helicase OS=Homo sapiens GN=SNRNP200 PE=1 SV=2	O75643	7	2
	Twinfilin-2 OS=Homo sapiens GN=TWF2 PE=1 SV=2	Q6IBS0		2
	Protein capicua homolog OS=Homo sapiens GN=CIC PE=4 SV=1	I3L2J0		2
	Twist-related protein 1 OS=Homo sapiens GN=TWIST1 PE=1 SV=1	Q15672	1	2
	Protein CCDC176 OS=Homo sapiens GN=CCDC176 PE=2 SV=1	B3KUM1	3	2
	U1 small nuclear ribonucleoprotein C OS=Homo sapiens GN=SNRPC PE=1 SV=1	P09234	1	2
	Protein CDV3 homolog OS=Homo sapiens GN=CDV3 PE=1 SV=1	Q9UKY7	1	2
	Tyrosine-protein phosphatase non-receptor type 4 OS=Homo sapiens GN=PTPN4 PE=1 SV=1	P29074		2
	Tyrosine-protein phosphatase non-receptor type 13 OS=Homo sapiens GN=PTPN13 PE=1 SV=2	Q12923	2	2
	Tyrosine-protein phosphatase non-receptor type 12 OS=Homo sapiens GN=PTPN12 PE=1 SV=3	Q05209	1	2
	Protein DDI1 homolog 2 OS=Homo sapiens GN=DDI2 PE=1 SV=1	Q5TDH0	1	2
	Protein disulfide-isomerase A3 OS=Homo sapiens GN=PDIA3 PE=1 SV=4	P30101	3	2
	Zinc finger protein 296 OS=Homo sapiens GN=ZNF296 PE=2 SV=1	Q8WUU4		2
	U4/U6 small nuclear ribonucleoprotein Prp4 OS=Homo sapiens GN=PRPF4 PE=1 SV=2	O43172	2	2
	Protein phosphatase Slingshot homolog 1 OS=Homo sapiens GN=SSH1 PE=1 SV=2	Q8WYL5		2
	Semaphorin-4D OS=Homo sapiens GN=SEMA4D PE=1 SV=1	Q92854	4	2
	Protein MMS22-like OS=Homo sapiens GN=MMS22L PE=1 SV=3	Q6ZRQ5		2
	Protein NLRC3 OS=Homo sapiens GN=NLRC3 PE=2 SV=2	Q7RTR2		2
	Protein O-mannosyl-transferase 1 OS=Homo sapiens GN=POMT1 PE=1 SV=3	Q9Y6A1		2
	Transmembrane protein 214 OS=Homo sapiens GN=TMEM214 PE=1 SV=2	Q6NUQ4	1	2
	Protein phosphatase 1 regulatory subunit 12C OS=Homo sapiens GN=PPP1R12C PE=1 SV=1	Q9BZL4		2
	Protein phosphatase 1 regulatory subunit 26 OS=Homo sapiens GN=PPP1R26 PE=1 SV=1	Q5T8A7	2	2
	Transmembrane protein 200B OS=Homo sapiens GN=TMEM200B PE=2 SV=1	Q69YZ2	2	2
	Transmembrane protein FAM155A OS=Homo sapiens GN=FAM155A PE=2 SV=1	B1AL88	1	2
	Zinc finger protein 404 OS=Homo sapiens GN=ZNF404 PE=2 SV=1	Q494X3	3	2
	Transportin-1 OS=Homo sapiens GN=TNPO1 PE=1 SV=2	Q92973	1	2
	Protein POF1B OS=Homo sapiens GN=POF1B PE=1 SV=3	Q8WVV4		2
	Protein PRRC2B OS=Homo sapiens GN=PRRC2B PE=1 SV=2	Q5JSZ5	2	2
	Transmembrane protein 109 OS=Homo sapiens GN=TMEM109 PE=1 SV=1	Q9BVC6	1	2
	Transmembrane protein 102 OS=Homo sapiens GN=TMEM102 PE=1 SV=1	Q8N9M5		2
	Transmembrane protease serine 7 OS=Homo sapiens GN=TMPRSS7 PE=2 SV=3	Q7RTY8		2
	Nuclear pore complex protein Nup214 OS=Homo sapiens GN=NUP214 PE=1 SV=2	P35658	1	2
	Protein S100-A11 OS=Homo sapiens GN=S100A11 PE=1 SV=2	P31949		2
	Protein S100-A9 OS=Homo sapiens GN=S100A9 PE=1 SV=1	P06702		2
	Transmembrane emp24 domain-containing protein 3 OS=Homo sapiens GN=TMED3 PE=1 SV=1	Q9Y3Q3	1	2
	Transmembrane protein 170A OS=Homo sapiens GN=TMEM170A PE=2 SV=1	Q8WVE7		2
	Protein KIAA0284 OS=Homo sapiens GN=KIAA0284 PE=1 SV=4	Q9Y4F5	1	2
	Protein SCO1 homolog, mitochondrial OS=Homo sapiens GN=SCO1 PE=1 SV=1	O75880		2
	tRNA wybutosine-synthesizing protein 2 homolog OS=Homo sapiens GN=TRMT12 PE=1 SV=1	Q53H54		2
	Nuclear receptor coactivator 5 OS=Homo sapiens GN=NCOA5 PE=1 SV=2	Q9HCD5	2	2
	tRNA guanosine-2'-O-methyltransferase TRM13 homolog OS=Homo sapiens GN=TRMT13 PE=1 SV=2	Q9NUP7		2
	Protein GREB1 OS=Homo sapiens GN=GREB1 PE=4 SV=1	F8W6E5		2
	tRNA (guanine(26)-N(2))-dimethyltransferase OS=Homo sapiens GN=TRMT1 PE=1 SV=1	Q9NXH9	1	2
	Zinc finger protein 318 OS=Homo sapiens GN=ZNF318 PE=1 SV=2	Q5VUA4	3	2
	Tripeptidyl-peptidase 2 OS=Homo sapiens GN=TPP2 PE=1 SV=4	P29144	4	2
	Transmembrane protein ENSP00000340100 OS=Homo sapiens PE=4 SV=2	A6NFA0		2
	Protein jagged-2 OS=Homo sapiens GN=JAG2 PE=1 SV=3	Q9Y219	1	2
	Protein FAM89A OS=Homo sapiens GN=FAM89A PE=2 SV=1	Q96GI7	1	2
	Protein kinase C theta type OS=Homo sapiens GN=PRKCQ PE=1 SV=3	Q04759	1	2
	Protein kinase C-binding protein NELL2 OS=Homo sapiens GN=NELL2 PE=1 SV=1	Q99435		2
	Protein KRBA1 (Fragment) OS=Homo sapiens GN=KRBA1 PE=4 SV=1	H7C501		2
	Protein lin-7 homolog C OS=Homo sapiens GN=LIN7C PE=1 SV=1	Q9NUP9	2	2
	Trinucleotide repeat-containing gene 18 protein OS=Homo sapiens GN=TNRC18 PE=1 SV=3	O15417	1	2
	Protein LSM14 homolog A OS=Homo sapiens GN=LSM14A PE=1 SV=3	Q8ND56		2
	Protein lyl-1 OS=Homo sapiens GN=LYL1 PE=2 SV=3	P12980		2
	Treslin OS=Homo sapiens GN=TICRR PE=1 SV=2	Q7Z2Z1	1	2
	Zinc finger protein 36, C3H1 type-like 1 OS=Homo sapiens GN=ZFP36L1 PE=1 SV=1	Q07352	2	2
	Protein jagged-1 OS=Homo sapiens GN=JAG1 PE=1 SV=3	P78504		2
	RNA binding protein, autoantigenic (HnRNP-associated with lethal yellow homolog (Mouse)) (Fragment) OS=Homo sapiens GN=RALY PE=2 SV=1	Q5QPM0		2
	Ribosomal protein S6 kinase alpha-1 OS=Homo sapiens GN=RPS6KA1 PE=1 SV=2	Q15418		2
	Ribosomal protein S6 kinase-like 1 OS=Homo sapiens GN=RPS6KL1 PE=2 SV=1	Q9Y6S9		2
	Spermatid perinuclear RNA-binding protein OS=Homo sapiens GN=STRBP PE=1 SV=1	Q96SI9		2
	Zinc finger protein 837 OS=Homo sapiens GN=ZNF837 PE=2 SV=2	Q96EG3		2
	RING finger and CCCH-type zinc finger domain-containing protein 2 OS=Homo sapiens GN=RC3H2 PE=1 SV=2	Q9HBD1	1	2
	RING finger and CCCH-type zinc finger domain-containing protein 2 OS=Homo sapiens GN=RC3H2 PE=4 SV=2	A6NHN2		2
	RING finger protein 121 (Fragment) OS=Homo sapiens GN=RNF121 PE=4 SV=1	H0YEH6		2
	Neurogranin OS=Homo sapiens GN=NRGN PE=1 SV=1	Q92686	2	2
	Sorting nexin-6 OS=Homo sapiens GN=SNX6 PE=1 SV=1	Q9UNH7	1	2
	Putative uncharacterized protein C8orf73 OS=Homo sapiens GN=C8orf73 PE=2 SV=2	A6NGR9	1	2
	RNA binding protein, autoantigenic (HnRNP-associated with lethal yellow homolog (Mouse)) (Fragment) OS=Homo sapiens GN=RALY PE=2 SV=1	Q5QPL9	1	2
	Ribonuclease inhibitor OS=Homo sapiens GN=RNH1 PE=1 SV=2	P13489	1	2
	RNA polymerase II elongation factor ELL2 OS=Homo sapiens GN=ELL2 PE=1 SV=2	O00472	1	2
	RNA polymerase II subunit A C-terminal domain phosphatase OS=Homo sapiens GN=CTDP1 PE=1 SV=3	Q9Y5B0		2
	Zinc finger protein castor homolog 1 OS=Homo sapiens GN=CASZ1 PE=2 SV=4	Q86V15		2
	Solute carrier organic anion transporter family member 3A1 OS=Homo sapiens GN=SLCO3A1 PE=1 SV=3	Q9UIG8	2	2
	RNA-binding motif protein, Y chromosome, family 1 member A1 OS=Homo sapiens GN=RBMY1A1 PE=1 SV=1	P0DJD3		2
	Solute carrier family 41 member 3 OS=Homo sapiens GN=SLC41A3 PE=2 SV=2	Q96GZ6	1	2
	Zinc finger protein Gfi-1 OS=Homo sapiens GN=GFI1 PE=1 SV=2	Q99684		2
	Solute carrier family 22 member 11 OS=Homo sapiens GN=SLC22A11 PE=1 SV=1	Q9NSA0	2	2
	Rod cGMP-specific 3',5'-cyclic phosphodiesterase subunit beta OS=Homo sapiens GN=PDE6B PE=1 SV=2	P35913	2	2
	Rotatin OS=Homo sapiens GN=RTTN PE=1 SV=3	Q86VV8	3	2
	Sorting nexin-18 OS=Homo sapiens GN=SNX18 PE=1 SV=2	Q96RF0		2
	Rho guanine nucleotide exchange factor 12 OS=Homo sapiens GN=ARHGEF12 PE=1 SV=1	Q9NZN5	2	2
	Structure-specific endonuclease subunit SLX4 OS=Homo sapiens GN=SLX4 PE=1 SV=3	Q8IY92		2
	Retinal dehydrogenase 2 OS=Homo sapiens GN=ALDH1A2 PE=1 SV=3	O94788	1	2
	Structural maintenance of chromosomes flexible hinge domain-containing protein 1 OS=Homo sapiens GN=SMCHD1 PE=1 SV=2	A6NHR9	3	2
	Neurosecretory protein VGF OS=Homo sapiens GN=VGF PE=1 SV=2	O15240	2	2
	Stress-associated endoplasmic reticulum protein 2 OS=Homo sapiens GN=SERP2 PE=2 SV=1	Q8N6R1		2
	Retinol dehydrogenase 11 OS=Homo sapiens GN=RDH11 PE=1 SV=2	Q8TC12		2
	Retrotransposon gag domain-containing protein 1 OS=Homo sapiens GN=RGAG1 PE=1 SV=1	Q8NET4	5	2
	Zinc finger protein 775 OS=Homo sapiens GN=ZNF775 PE=1 SV=2	Q96BV0		2
	Retrotransposon-like protein 1 OS=Homo sapiens GN=RTL1 PE=2 SV=3	A6NKG5		2
	Rho GTPase-activating protein 19 OS=Homo sapiens GN=ARHGAP19 PE=1 SV=1	Q14CB8	2	2
	Spermatogenesis-associated protein 5 OS=Homo sapiens GN=SPATA5 PE=1 SV=3	Q8NB90	3	2
	Neuron-specific calcium-binding protein hippocalcin OS=Homo sapiens GN=HPCA PE=1 SV=2	P84074		2
	Ribonuclease P protein subunit p40 OS=Homo sapiens GN=RPP40 PE=1 SV=3	O75818		2
	Rho guanine nucleotide exchange factor 18 OS=Homo sapiens GN=ARHGEF18 PE=1 SV=3	Q6ZSZ5	2	2
	Neuronal tyrosine-phosphorylated phosphoinositide-3-kinase adapter 1 OS=Homo sapiens GN=NYAP1 PE=1 SV=1	Q6ZVC0		2
	Rho guanine nucleotide exchange factor 4 OS=Homo sapiens GN=ARHGEF4 PE=4 SV=1	E7EV07	4	2
	Splicing factor, arginine/serine-rich 19 OS=Homo sapiens GN=SCAF1 PE=1 SV=3	Q9H7N4	2	2
	Neuronal pentraxin-1 OS=Homo sapiens GN=NPTX1 PE=2 SV=2	Q15818		2
	Zinc finger protein 793 OS=Homo sapiens GN=ZNF793 PE=2 SV=1	Q6ZN11		2
	Zinc finger protein 804B OS=Homo sapiens GN=ZNF804B PE=1 SV=2	A4D1E1		2
	Sphingosine-1-phosphate lyase 1 OS=Homo sapiens GN=SGPL1 PE=1 SV=3	O95470		2
	Sphingomyelin phosphodiesterase OS=Homo sapiens GN=SMPD1 PE=1 SV=4	P17405		2
	rRNA/tRNA 2'-O-methyltransferase fibrillarin-like protein 1 OS=Homo sapiens GN=FBLL1 PE=3 SV=1	A6NHQ2		2
	Sterile alpha motif domain-containing protein 9 OS=Homo sapiens GN=SAMD9 PE=1 SV=1	Q5K651	1	2
	Serine/threonine-protein kinase PRP4 homolog OS=Homo sapiens GN=PRPF4B PE=1 SV=3	Q13523		2
	Roundabout homolog 1 OS=Homo sapiens GN=ROBO1 PE=1 SV=1	Q9Y6N7		2
	Signal recognition particle 72 kDa protein OS=Homo sapiens GN=SRP72 PE=1 SV=3	O76094		2
	Serine/arginine-rich splicing factor 2 OS=Homo sapiens GN=SRSF2 PE=1 SV=4	Q01130	1	2
	Signal peptide, CUB and EGF-like domain-containing protein 1 OS=Homo sapiens GN=SCUBE1 PE=1 SV=3	Q8IWY4		2
	Serine/arginine-rich splicing factor 7 OS=Homo sapiens GN=SRSF7 PE=1 SV=1	Q16629	2	2
	Sideroflexin-2 OS=Homo sapiens GN=SFXN2 PE=1 SV=2	Q96NB2		2
	Serine/threonine-protein kinase A-Raf OS=Homo sapiens GN=ARAF PE=1 SV=2	P10398		2
	Serine/threonine-protein kinase BRSK1 OS=Homo sapiens GN=BRSK1 PE=1 SV=2	Q8TDC3		2
	Zinc transporter ZIP10 OS=Homo sapiens GN=SLC39A10 PE=1 SV=2	Q9ULF5	2	2
	Serine/threonine-protein kinase LATS2 OS=Homo sapiens GN=LATS2 PE=1 SV=2	Q9NRM7		2
	Neudesin OS=Homo sapiens GN=NENF PE=1 SV=1	Q9UMX5		2
	SH3-containing GRB2-like protein 3-interacting protein 1 OS=Homo sapiens GN=SGIP1 PE=1 SV=2	Q9BQI5		2
	SKI family transcriptional corepressor 1 OS=Homo sapiens GN=SKOR1 PE=1 SV=1	P84550	1	2
	SH3 and multiple ankyrin repeat domains protein 1 OS=Homo sapiens GN=SHANK1 PE=1 SV=2	Q9Y566		2
	Serine/threonine-protein kinase RIO1 OS=Homo sapiens GN=RIOK1 PE=1 SV=2	Q9BRS2		2
	Serine/threonine-protein kinase RIO3 OS=Homo sapiens GN=RIOK3 PE=1 SV=2	O14730		2
	Serine/threonine-protein kinase ULK4 OS=Homo sapiens GN=ULK4 PE=2 SV=2	Q96C45		2
	Serum paraoxonase/arylesterase 2 OS=Homo sapiens GN=PON2 PE=1 SV=3	Q15165		2
	Zinc-alpha-2-glycoprotein OS=Homo sapiens GN=AZGP1 PE=1 SV=2	P25311	1	2
	Serine/threonine-protein phosphatase 4 catalytic subunit OS=Homo sapiens GN=PPP4C PE=1 SV=1	P60510		2
	Serologically defined colon cancer antigen 3 OS=Homo sapiens GN=SDCCAG3 PE=1 SV=3	Q96C92		2
	Serine/threonine-protein phosphatase 6 regulatory ankyrin repeat subunit A OS=Homo sapiens GN=ANKRD28 PE=2 SV=1	B4DIW9	2	2
	Serine-protein kinase ATM OS=Homo sapiens GN=ATM PE=1 SV=3	Q13315	5	2
	Shadow of prion protein OS=Homo sapiens GN=SPRN PE=2 SV=1	Q5BIV9		2
	Schlafen family member 5 OS=Homo sapiens GN=SLFN5 PE=1 SV=1	Q08AF3	1	2
	Zinc finger protein 714 OS=Homo sapiens GN=ZNF714 PE=2 SV=2	Q96N38		2
	RRP12-like protein OS=Homo sapiens GN=RRP12 PE=1 SV=2	Q5JTH9		2
	Run domain Beclin-1 interacting and cystein-rich containing protein OS=Homo sapiens GN=KIAA0226 PE=1 SV=4	Q92622		2
	Neurexin-2-alpha OS=Homo sapiens GN=NRXN2 PE=2 SV=1	Q9P2S2	1	2
	Neurensin-2 OS=Homo sapiens GN=NRSN2 PE=2 SV=1	Q9GZP1		2
	Sodium/hydrogen exchanger 9B1 OS=Homo sapiens GN=SLC9B1 PE=2 SV=2	Q4ZJI4	2	2
	SAFB-like transcription modulator OS=Homo sapiens GN=SLTM PE=1 SV=2	Q9NWH9		2
	Sodium/hydrogen exchanger 10 (Fragment) OS=Homo sapiens GN=SLC9C1 PE=4 SV=1	C9J3M6		2
	Sal-like protein 3 OS=Homo sapiens GN=SALL3 PE=2 SV=2	Q9BXA9		2
	Sarcoplasmic/endoplasmic reticulum calcium ATPase 1 OS=Homo sapiens GN=ATP2A1 PE=1 SV=1	O14983	1	2
	Serine/Arginine-related protein 53 OS=Homo sapiens GN=RSRC1 PE=1 SV=1	Q96IZ7	3	2
	Zinc finger protein ZXDC OS=Homo sapiens GN=ZXDC PE=1 SV=2	Q2QGD7	1	2
	Neurexin-2-beta OS=Homo sapiens GN=NRXN2 PE=2 SV=1	P58401		2
	Sodium bicarbonate cotransporter 3 OS=Homo sapiens GN=SLC4A7 PE=1 SV=2	Q9Y6M7		2
	Sodium- and chloride-dependent GABA transporter 3 OS=Homo sapiens GN=SLC6A11 PE=2 SV=1	P48066	1	2
	Scm-like with four MBT domains protein 1 OS=Homo sapiens GN=SFMBT1 PE=1 SV=2	Q9UHJ3		2
	Sec1 family domain-containing protein 1 OS=Homo sapiens GN=SCFD1 PE=1 SV=4	Q8WVM8	2	2
	SNARE-associated protein Snapin OS=Homo sapiens GN=SNAPIN PE=1 SV=1	O95295	1	2
	Smoothelin OS=Homo sapiens GN=SMTN PE=1 SV=7	P53814	1	2
	Semaphorin-7A OS=Homo sapiens GN=SEMA7A PE=1 SV=1	O75326	1	2
	SLIT and NTRK-like protein 3 OS=Homo sapiens GN=SLITRK3 PE=2 SV=2	O94933	1	2
	Zinc finger RNA-binding protein OS=Homo sapiens GN=ZFR PE=1 SV=2	Q96KR1	4	2
	Zinc finger SWIM domain-containing protein 6 OS=Homo sapiens GN=ZSWIM6 PE=2 SV=2	Q9HCJ5	5	2
	Sarcoplasmic/endoplasmic reticulum calcium ATPase 2 OS=Homo sapiens GN=ATP2A2 PE=1 SV=1	P16615	1	2
	Putative uncharacterized protein C12orf63 OS=Homo sapiens GN=C12orf63 PE=2 SV=2	Q6ZTY8		2
	Zinc finger protein 608 OS=Homo sapiens GN=ZNF608 PE=1 SV=4	Q9ULD9	3	2
	Threonine--tRNA ligase, cytoplasmic OS=Homo sapiens GN=TARS PE=1 SV=3	P26639		2
	Putative pre-mRNA-splicing factor ATP-dependent RNA helicase DHX15 OS=Homo sapiens GN=DHX15 PE=1 SV=2	O43143	5	2
	THO complex subunit 4 OS=Homo sapiens GN=ALYREF PE=1 SV=3	Q86V81	3	2
	Thioredoxin domain-containing protein 5 OS=Homo sapiens GN=TXNDC5 PE=1 SV=2	Q8NBS9	2	2
	Putative ribosomal RNA methyltransferase NOP2 OS=Homo sapiens GN=NOP2 PE=1 SV=2	P46087	3	2
	Putative RNA exonuclease NEF-sp OS=Homo sapiens GN=44M2.3 PE=2 SV=1	Q96IC2		2
	Thimet oligopeptidase OS=Homo sapiens GN=THOP1 PE=1 SV=2	P52888		2
	Putative RNA-binding protein 15B OS=Homo sapiens GN=RBM15B PE=1 SV=3	Q8NDT2		2
	THAP domain-containing protein 9 OS=Homo sapiens GN=THAP9 PE=2 SV=2	Q9H5L6	1	2
	Thy-1 membrane glycoprotein OS=Homo sapiens GN=THY1 PE=1 SV=2	P04216		2
	TGF-beta-activated kinase 1 and MAP3K7-binding protein 3 OS=Homo sapiens GN=TAB3 PE=1 SV=2	Q8N5C8		2
	Thymidine phosphorylase OS=Homo sapiens GN=TYMP PE=1 SV=2	P19971		2
	Putative uncharacterized protein C16orf96 OS=Homo sapiens GN=C16orf96 PE=5 SV=3	A6NNT2	5	2
	Tetratricopeptide repeat protein 39A OS=Homo sapiens GN=TTC39A PE=2 SV=1	Q5SRH9		2
	Nucleoside diphosphate kinase A OS=Homo sapiens GN=NME1 PE=1 SV=1	P15531		2
	Putative uncharacterized protein C9orf106 OS=Homo sapiens GN=C9orf106 PE=2 SV=1	Q8NAJ2		2
	Protein shisa-7 OS=Homo sapiens GN=SHISA7 PE=2 SV=3	A6NL88	3	2
	Putative uncharacterized protein ENSP00000380674 OS=Homo sapiens PE=5 SV=2	A8MTW9		2
	Putative uncharacterized protein FLJ36797 OS=Homo sapiens PE=5 SV=1	Q8N9P0	1	2
	Putative uncharacterized protein SERTAD4-AS1 OS=Homo sapiens GN=SERTAD4-AS1 PE=5 SV=2	Q5TG53	1	2
	Putative unconventional myosin-XVB OS=Homo sapiens GN=MYO15B PE=5 SV=2	Q96JP2	1	2
	Neurotrimin OS=Homo sapiens GN=NTM PE=1 SV=1	Q9P121		2
	THAP domain-containing protein 2 OS=Homo sapiens GN=THAP2 PE=1 SV=1	Q9H0W7		2
	Putative FAM120A opposite strand protein OS=Homo sapiens GN=FAM120AOS PE=5 SV=1	Q5T036		2
	Transcription factor 20 OS=Homo sapiens GN=TCF20 PE=1 SV=3	Q9UGU0		2
	Transcription factor 12 OS=Homo sapiens GN=TCF12 PE=1 SV=1	Q99081	1	2
	Purkinje cell protein 4 OS=Homo sapiens GN=PCP4 PE=1 SV=3	P48539	1	2
	Putative 40S ribosomal protein S10-like OS=Homo sapiens GN=RPS10P5 PE=5 SV=1	Q9NQ39	2	2
	Putative 40S ribosomal protein S26-like 1 OS=Homo sapiens GN=RPS26P11 PE=5 SV=1	Q5JNZ5	2	2
	Transcription cofactor HES-6 OS=Homo sapiens GN=HES6 PE=1 SV=1	Q96HZ4		2
	Transcription cofactor HES-6 (Fragment) OS=Homo sapiens GN=HES6 PE=4 SV=1	H7C020		2
	Trafficking protein particle complex subunit 9 OS=Homo sapiens GN=TRAPPC9 PE=1 SV=2	Q96Q05		2
	Trafficking kinesin-binding protein 2 OS=Homo sapiens GN=TRAK2 PE=1 SV=2	O60296	1	2
	Zinc finger protein 512 OS=Homo sapiens GN=ZNF512 PE=1 SV=2	Q96ME7	2	2
	Putative Polycomb group protein ASXL3 OS=Homo sapiens GN=ASXL3 PE=2 SV=3	Q9C0F0	2	2
	Putative eukaryotic translation initiation factor 2 subunit 3-like protein OS=Homo sapiens GN=EIF2S3L PE=5 SV=2	Q2VIR3		2
	Telomerase-binding protein EST1A OS=Homo sapiens GN=SMG6 PE=1 SV=2	Q86US8		2
	Zinc finger protein 518A OS=Homo sapiens GN=ZNF518A PE=1 SV=2	Q6AHZ1		2
	Putative heat shock protein HSP 90-beta 4 OS=Homo sapiens GN=HSP90AB4P PE=5 SV=1	Q58FF6		2
	Putative helicase MOV-10 OS=Homo sapiens GN=MOV10 PE=1 SV=2	Q9HCE1		2
	Putative histone-lysine N-methyltransferase PRDM6 OS=Homo sapiens GN=PRDM6 PE=2 SV=2	Q9NQX0		2
	TLC domain-containing protein 1 OS=Homo sapiens GN=TLCD1 PE=2 SV=1	Q96CP7		2
	Notch 4 extracellular truncation OS=Homo sapiens GN=NOTCH4 PE=2 SV=1	B4DFM3		2
	Putative IQ motif and ankyrin repeat domain-containing protein LOC642574 OS=Homo sapiens PE=5 SV=2	A8MXQ7		2
	Putative L-aspartate dehydrogenase OS=Homo sapiens GN=ASPDH PE=2 SV=2	A6ND91		2
	Putative methyltransferase NSUN5C OS=Homo sapiens GN=NSUN5P2 PE=5 SV=2	Q63ZY6		2
	Thyroid hormone receptor interacting protein 6 isoform 2 OS=Homo sapiens GN=TRIP6i2 PE=4 SV=1	F2ZC07		2
	Torsin-4A OS=Homo sapiens GN=TOR4A PE=1 SV=2	Q9NXH8		2
	Synapsin-3 OS=Homo sapiens GN=SYN3 PE=1 SV=2	O14994		2
	Tensin-1 OS=Homo sapiens GN=TNS1 PE=1 SV=2	Q9HBL0	1	2
	Syncoilin OS=Homo sapiens GN=SYNC PE=2 SV=3	Q9H7C4		2
	Synaptotagmin-9 OS=Homo sapiens GN=SYT9 PE=2 SV=1	Q86SS6		2
	Synaptotagmin-8 OS=Homo sapiens GN=SYT8 PE=2 SV=4	Q8NBV8		2
	Ras-related protein Rap-1A OS=Homo sapiens GN=RAP1A PE=1 SV=1	P62834		2
	Ras-related protein R-Ras2 OS=Homo sapiens GN=RRAS2 PE=1 SV=1	P62070		2
	Ras-specific guanine nucleotide-releasing factor 1 OS=Homo sapiens GN=RASGRF1 PE=1 SV=1	Q13972		2
	Ras-specific guanine nucleotide-releasing factor 2 OS=Homo sapiens GN=RASGRF2 PE=1 SV=2	O14827	1	2
	Synaptopodin OS=Homo sapiens GN=SYNPO PE=1 SV=2	Q8N3V7		2
	Receptor-interacting serine/threonine-protein kinase 1 OS=Homo sapiens GN=RIPK1 PE=1 SV=3	Q13546	2	2
	Ras-related protein Rab-21 OS=Homo sapiens GN=RAB21 PE=1 SV=3	Q9UL25	1	2
	Synaptic vesicle membrane protein VAT-1 homolog-like OS=Homo sapiens GN=VAT1L PE=1 SV=2	Q9HCJ6		2
	NF-X1-type zinc finger protein NFXL1 OS=Homo sapiens GN=NFXL1 PE=1 SV=2	Q6ZNB6	1	2
	Receptor-type tyrosine-protein phosphatase gamma OS=Homo sapiens GN=PTPRG PE=1 SV=4	P23470		2
	Receptor-type tyrosine-protein phosphatase zeta OS=Homo sapiens GN=PTPRZ1 PE=1 SV=4	P23471		2
	Reelin OS=Homo sapiens GN=RELN PE=1 SV=3	P78509	1	2
	Regulator of chromosome condensation OS=Homo sapiens GN=RCC1 PE=1 SV=1	P18754	1	2
	Zinc finger protein 703 OS=Homo sapiens GN=ZNF703 PE=1 SV=1	Q9H7S9	2	2
	Relaxin receptor 2 OS=Homo sapiens GN=RXFP2 PE=1 SV=1	Q8WXD0	2	2
	Relaxin-3 receptor 1 OS=Homo sapiens GN=RXFP3 PE=1 SV=1	Q9NSD7		2
	SUMO-activating enzyme subunit 1 OS=Homo sapiens GN=SAE1 PE=1 SV=1	Q9UBE0	1	2
	Replication factor C subunit 2 OS=Homo sapiens GN=RFC2 PE=1 SV=3	P35250		2
	Proto-oncogene vav OS=Homo sapiens GN=VAV1 PE=1 SV=4	P15498		2
	Receptor-type tyrosine-protein phosphatase beta OS=Homo sapiens GN=PTPRB PE=1 SV=3	P23467		2
	Niban-like protein 2 OS=Homo sapiens GN=FAM129C PE=1 SV=2	Q86XR2		2
	Nitric oxide synthase, endothelial OS=Homo sapiens GN=NOS3 PE=1 SV=3	P29474	2	2
	Pyruvate kinase isozymes R/L OS=Homo sapiens GN=PKLR PE=1 SV=2	P30613	1	2
	Quinone oxidoreductase OS=Homo sapiens GN=CRYZ PE=1 SV=1	Q08257		2
	Ninein-like protein OS=Homo sapiens GN=NINL PE=1 SV=2	Q9Y2I6	1	2
	Nicastrin OS=Homo sapiens GN=NCSTN PE=1 SV=2	Q92542		2
	Rab effector MyRIP OS=Homo sapiens GN=MYRIP PE=1 SV=2	Q8NFW9	1	2
	Nibrin OS=Homo sapiens GN=NBN PE=1 SV=1	O60934		2
	Rab11 family-interacting protein 1 OS=Homo sapiens GN=RAB11FIP1 PE=1 SV=2	Q6WKZ4	1	2
	Rabphilin-3A OS=Homo sapiens GN=RPH3A PE=1 SV=1	Q9Y2J0	5	2
	RAC-alpha serine/threonine-protein kinase OS=Homo sapiens GN=AKT1 PE=1 SV=2	P31749		2
	Ras-related protein Rab-8A OS=Homo sapiens GN=RAB8A PE=1 SV=1	P61006		2
	TBC1 domain family member 4 OS=Homo sapiens GN=TBC1D4 PE=1 SV=2	O60343	2	2
	Succinyl-CoA ligase [ADP/GDP-forming] subunit alpha, mitochondrial OS=Homo sapiens GN=SUCLG1 PE=1 SV=4	P53597	1	2
	Ran GTPase-activating protein 1 OS=Homo sapiens GN=RANGAP1 PE=1 SV=1	P46060		2
	TBC1 domain family member 13 OS=Homo sapiens GN=TBC1D13 PE=1 SV=3	Q9NVG8	1	2
	Rap guanine nucleotide exchange factor 3 OS=Homo sapiens GN=RAPGEF3 PE=1 SV=6	O95398		2
	Taste receptor type 2 member 19 OS=Homo sapiens GN=TAS2R19 PE=1 SV=1	P59542	3	2
	Zinc finger protein 687 OS=Homo sapiens GN=ZNF687 PE=1 SV=1	Q8N1G0		2
	Ras-associating and dilute domain-containing protein OS=Homo sapiens GN=RADIL PE=1 SV=5	Q96JH8		2
	Syntaxin-binding protein 4 OS=Homo sapiens GN=STXBP4 PE=1 SV=2	Q6ZWJ1		2
	Ras-related protein Rab-14 OS=Homo sapiens GN=RAB14 PE=1 SV=4	P61106	1	2
	Syntaxin-5 OS=Homo sapiens GN=STX5 PE=1 SV=2	Q13190	2	2
	NHL repeat-containing protein 2 OS=Homo sapiens GN=NHLRC2 PE=1 SV=1	Q8NBF2		2
	Radical S-adenosyl methionine domain-containing protein 1, mitochondrial OS=Homo sapiens GN=RSAD1 PE=2 SV=2	Q9HA92		2
	Probable ATP-dependent RNA helicase DDX52 OS=Homo sapiens GN=DDX52 PE=1 SV=3	Q9Y2R4		2
	Zinc finger homeobox protein 4 OS=Homo sapiens GN=ZFHX4 PE=1 SV=1	Q86UP3	2	2
	Zeta-sarcoglycan OS=Homo sapiens GN=SGCZ PE=2 SV=1	Q96LD1		2
	Voltage-dependent L-type calcium channel subunit alpha-1D OS=Homo sapiens GN=CACNA1D PE=1 SV=2	Q01668		2
	Peroxisomal carnitine O-octanoyltransferase OS=Homo sapiens GN=CROT PE=1 SV=2	Q9UKG9		2
	Peroxisomal membrane protein 11A OS=Homo sapiens GN=PEX11A PE=1 SV=1	O75192		2
	Peroxisomal membrane protein PEX13 OS=Homo sapiens GN=PEX13 PE=1 SV=2	Q92968	4	2
	Voltage-dependent anion-selective channel protein 3 OS=Homo sapiens GN=VDAC3 PE=1 SV=1	Q9Y277		2
	Zinc finger and BTB domain-containing protein 12 OS=Homo sapiens GN=ZBTB12 PE=1 SV=1	Q9Y330		2
	Voltage-dependent anion-selective channel protein 1 OS=Homo sapiens GN=VDAC1 PE=1 SV=2	P21796	2	2
	Probable crossover junction endonuclease EME2 OS=Homo sapiens GN=EME2 PE=1 SV=2	A4GXA9		2
	Zinc finger homeobox protein 2 OS=Homo sapiens GN=ZFHX2 PE=2 SV=3	Q9C0A1	1	2
	WD repeat-containing protein 3 OS=Homo sapiens GN=WDR3 PE=1 SV=1	Q9UNX4		2
	Probable bifunctional methylenetetrahydrofolate dehydrogenase/cyclohydrolase 2 OS=Homo sapiens GN=MTHFD2L PE=2 SV=3	Q9H903		2
	Uncharacterized protein C17orf59 OS=Homo sapiens GN=C17orf59 PE=1 SV=2	Q96GS4	2	2
	Probable ATP-dependent RNA helicase DDX46 OS=Homo sapiens GN=DDX46 PE=1 SV=2	Q7L014		2
	Uncharacterized protein C2orf16 OS=Homo sapiens GN=C2orf16 PE=1 SV=3	Q68DN1		2
	Visual system homeobox 1 OS=Homo sapiens GN=VSX1 PE=1 SV=2	Q9NZR4		2
	Probable ATP-dependent RNA helicase DDX10 OS=Homo sapiens GN=DDX10 PE=1 SV=2	Q13206		2
	Pleckstrin homology-like domain family B member 2 OS=Homo sapiens GN=PHLDB2 PE=1 SV=2	Q86SQ0	2	2
	PEX5-related protein OS=Homo sapiens GN=PEX5L PE=1 SV=2	Q8IYB4		2
	Uncharacterized protein C3orf17 OS=Homo sapiens GN=C3orf17 PE=1 SV=3	Q6NW34		2
	Vesicular acetylcholine transporter OS=Homo sapiens GN=SLC18A3 PE=1 SV=2	Q16572		2
	PRKC apoptosis WT1 regulator protein OS=Homo sapiens GN=PAWR PE=1 SV=1	Q96IZ0		2
	Prestin OS=Homo sapiens GN=SLC26A5 PE=2 SV=1	P58743		2
	Pre-rRNA-processing protein TSR1 homolog OS=Homo sapiens GN=TSR1 PE=1 SV=1	Q2NL82	1	2
	Ornithine aminotransferase, mitochondrial OS=Homo sapiens GN=OAT PE=1 SV=1	P04181	1	2
	Uncharacterized protein C1orf170 OS=Homo sapiens GN=C1orf170 PE=2 SV=3	Q5SV97		2
	Probable palmitoyltransferase ZDHHC11 OS=Homo sapiens GN=ZDHHC11 PE=2 SV=1	Q9H8X9		2
	Profilin OS=Homo sapiens GN=PFN2 PE=3 SV=1	C9J2N0	1	2
	Procollagen-lysine,2-oxoglutarate 5-dioxygenase 2 OS=Homo sapiens GN=PLOD2 PE=1 SV=2	O00469	4	2
	OTU domain-containing protein 7A OS=Homo sapiens GN=OTUD7A PE=1 SV=1	Q8TE49	1	2
	WD repeat and HMG-box DNA-binding protein 1 OS=Homo sapiens GN=WDHD1 PE=1 SV=1	O75717	2	2
	Probable ubiquitin carboxyl-terminal hydrolase FAF-X OS=Homo sapiens GN=USP9X PE=1 SV=3	Q93008	2	2
	PCNA-interacting partner OS=Homo sapiens GN=PARPBP PE=1 SV=3	Q9NWS1	1	2
	Probable tRNA (uracil-O(2)-)-methyltransferase OS=Homo sapiens GN=TRMT44 PE=2 SV=2	Q8IYL2		2
	WASH complex subunit strumpellin OS=Homo sapiens GN=KIAA0196 PE=1 SV=1	Q12768		2
	WASH complex subunit FAM21C OS=Homo sapiens GN=FAM21C PE=1 SV=3	Q9Y4E1		2
	WASH complex subunit 7 OS=Homo sapiens GN=KIAA1033 PE=1 SV=2	Q2M389	2	2
	Probable RNA-binding protein 19 OS=Homo sapiens GN=RBM19 PE=1 SV=3	Q9Y4C8		2
	Probable ribonuclease ZC3H12D OS=Homo sapiens GN=ZC3H12D PE=2 SV=3	A2A288	2	2
	Uncharacterized protein C17orf89 OS=Homo sapiens GN=C17orf89 PE=1 SV=1	A1L188		2
	WAS/WASL-interacting protein family member 1 OS=Homo sapiens GN=WIPF1 PE=1 SV=3	O43516	1	2
	Probable exonuclease mut-7 homolog, isoform 5 OS=Homo sapiens GN=EXD3 PE=4 SV=1	E9PN82		2
	V-set and transmembrane domain-containing protein 5 OS=Homo sapiens GN=VSTM5 PE=4 SV=1	A8MXK1		2
	Uncharacterized protein C12orf43 OS=Homo sapiens GN=C12orf43 PE=1 SV=2	Q96C57	1	2
	Peptidyl-prolyl cis-trans isomerase FKBP10 OS=Homo sapiens GN=FKBP10 PE=1 SV=1	Q96AY3	1	2
	V-set and immunoglobulin domain-containing protein 10 OS=Homo sapiens GN=VSIG10 PE=2 SV=1	Q8N0Z9		2
	Probable helicase senataxin OS=Homo sapiens GN=SETX PE=1 SV=4	Q7Z333		2
	VPS10 domain-containing receptor SorCS2 OS=Homo sapiens GN=SORCS2 PE=1 SV=3	Q96PQ0	1	2
	Peptidyl-tRNA hydrolase ICT1, mitochondrial OS=Homo sapiens GN=ICT1 PE=1 SV=1	Q14197	4	2
	Zinc finger imprinted 2 OS=Homo sapiens GN=ZIM2 PE=2 SV=1	Q9NZV7	2	2
	Uncharacterized protein C15orf32 OS=Homo sapiens GN=C15orf32 PE=2 SV=2	Q32M92		2
	von Willebrand factor A domain-containing protein 5A OS=Homo sapiens GN=VWA5A PE=2 SV=2	O00534	1	2
	von Willebrand factor A domain-containing protein 1 OS=Homo sapiens GN=VWA1 PE=2 SV=1	Q6PCB0		2
	Pre-mRNA-splicing factor SYF1 OS=Homo sapiens GN=XAB2 PE=1 SV=2	Q9HCS7	1	2
	Uncharacterized protein C10orf95 OS=Homo sapiens GN=C10orf95 PE=2 SV=1	Q9H7T3	1	2
	Placenta-expressed transcript 1 protein OS=Homo sapiens GN=PLET1 PE=2 SV=2	Q6UQ28		2
	Vesicle transport through interaction with t-SNAREs homolog 1B OS=Homo sapiens GN=VTI1B PE=4 SV=1	G3V5I2	1	2
	Usherin OS=Homo sapiens GN=USH2A PE=1 SV=3	O75445	4	2
	Polypyrimidine tract-binding protein 1 OS=Homo sapiens GN=PTBP1 PE=1 SV=1	P26599	2	2
	Polycystin-2 OS=Homo sapiens GN=PKD2 PE=1 SV=3	Q13563		2
	Phospholipid hydroperoxide glutathione peroxidase, mitochondrial OS=Homo sapiens GN=GPX4 PE=1 SV=3	P36969	1	2
	Polycomb protein EED OS=Homo sapiens GN=EED PE=1 SV=2	O75530	1	2
	Polyadenylate-binding protein 4-like OS=Homo sapiens GN=PABPC4L PE=2 SV=1	P0CB38		2
	Polyadenylate-binding protein 2 OS=Homo sapiens GN=PABPN1 PE=1 SV=3	Q86U42	1	2
	Zinc finger CCCH domain-containing protein 4 OS=Homo sapiens GN=ZC3H4 PE=1 SV=3	Q9UPT8	2	2
	Pituitary homeobox 1 (Fragment) OS=Homo sapiens GN=PITX1 PE=3 SV=1	H0YJC8	3	2
	Poly(A) RNA polymerase, mitochondrial OS=Homo sapiens GN=MTPAP PE=1 SV=1	Q9NVV4		2
	Zinc finger and SCAN domain-containing protein 21 OS=Homo sapiens GN=ZSCAN21 PE=2 SV=2	Q9Y5A6		2
	Polyribonucleotide 5'-hydroxyl-kinase Clp1 OS=Homo sapiens GN=CLP1 PE=1 SV=1	Q92989		2
	Uncharacterized protein OS=Homo sapiens PE=4 SV=1	F5GXD2		2
	Zinc finger and SCAN domain-containing protein 10 OS=Homo sapiens GN=ZSCAN10 PE=2 SV=1	Q96SZ4		2
	Plakophilin-2 OS=Homo sapiens GN=PKP2 PE=1 SV=2	Q99959		2
	UPF0458 protein C7orf42 (Fragment) OS=Homo sapiens GN=C7orf42 PE=4 SV=1	C9J3C8	3	2
	Uncharacterized protein OS=Homo sapiens PE=4 SV=1	F8VTT9		2
	Plasma membrane calcium-transporting ATPase 3 OS=Homo sapiens GN=ATP2B3 PE=1 SV=3	Q16720		2
	Poly [ADP-ribose] polymerase 2 OS=Homo sapiens GN=PARP2 PE=1 SV=2	Q9UGN5	4	2
	UPF0378 protein KIAA0100 OS=Homo sapiens GN=KIAA0100 PE=1 SV=3	Q14667	1	2
	Unconventional prefoldin RPB5 interactor 1 OS=Homo sapiens GN=URI1 PE=1 SV=3	O94763	1	2
	Proteasome subunit beta type-2 OS=Homo sapiens GN=PSMB2 PE=1 SV=1	P49721	2	2
	Zinc finger BED domain-containing protein 1 OS=Homo sapiens GN=ZBED1 PE=1 SV=1	O96006		2
	Pleckstrin homology domain-containing family G member 1 OS=Homo sapiens GN=PLEKHG1 PE=1 SV=2	Q9ULL1		2
	Unconventional myosin-Ib OS=Homo sapiens GN=MYO1B PE=2 SV=3	O43795	1	2
	Plexin-A4 OS=Homo sapiens GN=PLXNA4 PE=1 SV=4	Q9HCM2		2
	Poly [ADP-ribose] polymerase 8 OS=Homo sapiens GN=PARP8 PE=1 SV=1	Q8N3A8		2
	Vacuolar protein sorting-associated protein 8 homolog OS=Homo sapiens GN=VPS8 PE=1 SV=3	Q8N3P4	1	2
	Peroxisome biogenesis factor 1 OS=Homo sapiens GN=PEX1 PE=1 SV=1	O43933		2
	Phakinin OS=Homo sapiens GN=BFSP2 PE=1 SV=1	Q13515	4	2
	Very low-density lipoprotein receptor OS=Homo sapiens GN=VLDLR PE=1 SV=1	P98155		2
	Pre-mRNA cleavage complex 2 protein Pcf11 OS=Homo sapiens GN=PCF11 PE=1 SV=3	O94913	2	2
	Uncharacterized protein C7orf43 OS=Homo sapiens GN=C7orf43 PE=1 SV=2	Q8WVR3		2
	pre-mRNA 3' end processing protein WDR33 OS=Homo sapiens GN=WDR33 PE=1 SV=2	Q9C0J8	1	2
	Zinc finger CCHC domain-containing protein 2 OS=Homo sapiens GN=ZCCHC2 PE=1 SV=6	Q9C0B9	1	2
	Pregnancy-specific beta-1-glycoprotein 3 OS=Homo sapiens GN=PSG3 PE=2 SV=2	Q16557		2
	Zinc finger and BTB domain-containing protein 4 OS=Homo sapiens GN=ZBTB4 PE=1 SV=3	Q9P1Z0	2	2
	Uncharacterized protein C9orf131 OS=Homo sapiens GN=C9orf131 PE=2 SV=3	Q5VYM1		2
	Vasodilator-stimulated phosphoprotein OS=Homo sapiens GN=VASP PE=1 SV=3	P50552	4	2
	Vasoactive intestinal polypeptide receptor 2 OS=Homo sapiens GN=VIPR2 PE=3 SV=1	C9JCP7		2
	Uncharacterized protein KIAA1551 OS=Homo sapiens GN=KIAA1551 PE=1 SV=3	Q9HCM1		2
	Valine--tRNA ligase OS=Homo sapiens GN=VARS PE=1 SV=4	P26640	4	2
	PH domain leucine-rich repeat-containing protein phosphatase 1 OS=Homo sapiens GN=PHLPP1 PE=1 SV=3	O60346		2
	Uncharacterized protein C9orf50 OS=Homo sapiens GN=C9orf50 PE=2 SV=1	Q5SZB4		2
	Zinc finger CCCH-type antiviral protein 1-like OS=Homo sapiens GN=ZC3HAV1L PE=1 SV=2	Q96H79		2
	Uncharacterized protein DKFZp434B061 OS=Homo sapiens PE=2 SV=2	Q9UF83	1	2
	Phosphate-regulating neutral endopeptidase OS=Homo sapiens GN=PHEX PE=1 SV=1	P78562		2
	Potassium/sodium hyperpolarization-activated cyclic nucleotide-gated channel 1 OS=Homo sapiens GN=HCN1 PE=2 SV=3	O60741	1	2
	Uncharacterized protein FLJ45252 OS=Homo sapiens PE=1 SV=2	Q6ZSR9		2
	Potassium voltage-gated channel subfamily KQT member 5 OS=Homo sapiens GN=KCNQ5 PE=1 SV=3	Q9NR82	1	2
	Vacuolar protein sorting-associated protein 16 homolog OS=Homo sapiens GN=VPS16 PE=1 SV=2	Q9H269	3	2
	Vacuolar protein sorting-associated protein 13D OS=Homo sapiens GN=VPS13D PE=1 SV=1	Q5THJ4	4	2
	Phosphatidylinositol 4-kinase alpha OS=Homo sapiens GN=PI4KA PE=4 SV=1	J3KN10		2
	Uncharacterized protein KIAA0895-like OS=Homo sapiens GN=KIAA0895L PE=2 SV=1	Q68EN5		2
	Phosphatidylinositol 5-phosphate 4-kinase type-2 alpha OS=Homo sapiens GN=PIP4K2A PE=1 SV=2	P48426	1	2
	Uncharacterized protein C9orf171 OS=Homo sapiens GN=C9orf171 PE=2 SV=1	Q6ZQR2		2
	Zinc finger MYM-type protein 6 OS=Homo sapiens GN=ZMYM6 PE=1 SV=2	O95789	1	2
	Proline-, glutamic acid- and leucine-rich protein 1 OS=Homo sapiens GN=PELP1 PE=1 SV=2	Q8IZL8	1	2
	Proliferation-associated protein 2G4 OS=Homo sapiens GN=PA2G4 PE=1 SV=3	Q9UQ80	1	2
	Palladin OS=Homo sapiens GN=PALLD PE=1 SV=3	Q8WX93	4	2
	Ubiquitin carboxyl-terminal hydrolase 7 OS=Homo sapiens GN=USP7 PE=1 SV=2	Q93009	2	2
	Zinc finger MYM-type protein 5 OS=Homo sapiens GN=ZMYM5 PE=1 SV=4	Q9UJ78	1	2
	Wee1-like protein kinase 2 OS=Homo sapiens GN=WEE2 PE=2 SV=2	P0C1S8	1	2
	WD repeat-containing protein 67 OS=Homo sapiens GN=WDR67 PE=2 SV=2	Q96DN5	1	2
	WD repeat-containing protein 52 OS=Homo sapiens GN=WDR52 PE=1 SV=1	Q96MT7	1	2
	PAB-dependent poly(A)-specific ribonuclease subunit 3 OS=Homo sapiens GN=PAN3 PE=1 SV=3	Q58A45		2
	Partner of Y14 and mago OS=Homo sapiens GN=WIBG PE=4 SV=1	F8VXH2		2
	Oxysterol-binding protein-related protein 8 OS=Homo sapiens GN=OSBPL8 PE=1 SV=3	Q9BZF1	2	2
	Proprotein convertase subtilisin/kexin type 4 OS=Homo sapiens GN=PCSK4 PE=2 SV=2	Q6UW60	1	2
	Proprotein convertase subtilisin/kexin type 7 OS=Homo sapiens GN=PCSK7 PE=1 SV=2	Q16549	1	2
	Ubiquitin-60S ribosomal protein L40 OS=Homo sapiens GN=UBA52 PE=1 SV=2	P62987	2	2
	Progesterone-induced-blocking factor 1 OS=Homo sapiens GN=PIBF1 PE=2 SV=2	Q8WXW3	3	2
	UHRF1-binding protein 1 OS=Homo sapiens GN=UHRF1BP1 PE=1 SV=1	Q6BDS2		2
	P2X purinoceptor 2 OS=Homo sapiens GN=P2RX2 PE=2 SV=1	Q9UBL9	1	2
	Palmitoyltransferase ZDHHC5 OS=Homo sapiens GN=ZDHHC5 PE=1 SV=2	Q9C0B5		2
	Proteasome subunit alpha type-2 OS=Homo sapiens GN=PSMA2 PE=1 SV=2	P25787	3	2
	Ovostatin homolog 1 OS=Homo sapiens GN=OVOS1 PE=2 SV=2	Q6IE37	1	2
	Proteasome subunit alpha type-1 OS=Homo sapiens GN=PSMA1 PE=1 SV=1	P25786	3	2
	Partitioning defective 3 homolog OS=Homo sapiens GN=PARD3 PE=1 SV=2	Q8TEW0	2	2
	Zinc finger protein 106 homolog OS=Homo sapiens GN=ZFP106 PE=1 SV=1	Q9H2Y7	1	2
	WD repeat-containing protein 62 OS=Homo sapiens GN=WDR62 PE=1 SV=4	O43379		2
	Ufm1-specific protease 2 OS=Homo sapiens GN=UFSP2 PE=2 SV=3	Q9NUQ7		2
	Proteasome inhibitor PI31 subunit OS=Homo sapiens GN=PSMF1 PE=1 SV=2	Q92530		2
	p53-induced protein with a death domain OS=Homo sapiens GN=PIDD PE=1 SV=2	Q9HB75		2
	Prostacyclin synthase OS=Homo sapiens GN=PTGIS PE=1 SV=1	Q16647		2
